# Supplementary material for: Difluorodiazoethane as a masked acetylene equivalent in formal [3 + 2] cycloadditions with ketones to access 2,3-functionalized furans
Source: Royal Society of Chemistry journal article supplement (doi:10.1039/d2qo01045c), 2022-01-01
Supplement: d2qo01045c1.pdf [file d2qo01045c1.pdf]

## *Supporting Information for*

### **Difluorodiazaoethane as a Masked Acetylene Equivalent in Formal [3+2] Cycloadditions with Ketones to Access 2,3-Functionalized Furans**

Xiaolong Zhang,<sup>b</sup> Xin Li,<sup>a</sup> Paramasivam Sivaguru,<sup>b</sup> Jiayi Wu,<sup>b</sup> Giuseppe Zanoni,<sup>b</sup> Jin-Na Song<sup>\*,a</sup> and  
Yongquan Ning<sup>\*b</sup>

a. School of Life Science, Jilin University, Changchun 130012, China.

b. Jilin Province Key Laboratory of Organic Functional Molecular Design & Synthesis, Department of  
Chemistry, Northeast Normal University, Changchun 130024, China.

c. Department of Chemistry, University of Pavia, Viale Taramelli 12, Pavia 27100, Italy.

Email: songjin2010@jlu.edu.cn; ningyq508@nenu.edu.cn.

## **Contents**

|                                                                                                           |           |
|-----------------------------------------------------------------------------------------------------------|-----------|
| <b>I.</b> General information.....                                                                        | <b>2</b>  |
| <b>II.</b> General procedures for the synthesis of difluoroacetaldehyde <i>N</i> -sulfonylhydrazones..... | <b>2</b>  |
| <b>III.</b> General procedures for synthesis of 2,3-Functionalized Furans.....                            | <b>2</b>  |
| <b>IV.</b> Characterization data of prepared compounds.....                                               | <b>3</b>  |
| <b>V.</b> X-ray single crystal data of <b>2a</b> and <b>13</b> .....                                      | <b>23</b> |
| <b>VI.</b> Copies of NMR spectra.....                                                                     | <b>25</b> |
| <b>VII.</b> Computational details.....                                                                    | <b>89</b> |

## I. General information.

All reagents were purchased from commercial sources and used without purification unless otherwise mentioned. The products were purified by column chromatography over silica gel (300-400). NMR spectra were recorded on a Bruker Advance 600 ( $^1\text{H}$ : 600 MHz,  $^{13}\text{C}$ : 150 MHz) and Bruker Advance 500 ( $^1\text{H}$ : 500 MHz,  $^{13}\text{C}$ : 125 MHz,  $^{19}\text{F}$ : 471 MHz) at ambient temperature. Data were reported as chemical shifts in ppm relative to TMS (0.00 ppm) for  $^1\text{H}$  and  $\text{CDCl}_3$  (77.0 ppm) for  $^{13}\text{C}$ . The following abbreviations were used to explain the multiplicities: s = singlet, d = doublet, t = triplet, q = quartet, m = multiplet, br = broad. Mass spectra were recorded on BRUKER AutoflexIII Smartbeam MS-spectrometer. High-resolution mass spectra (HRMS) were recorded on Bruker microTof by using ESI method.

## II. General procedures for the synthesis of difluoroacetaldehyde *N*-tosylhydrazone (DFHZ-Ts).

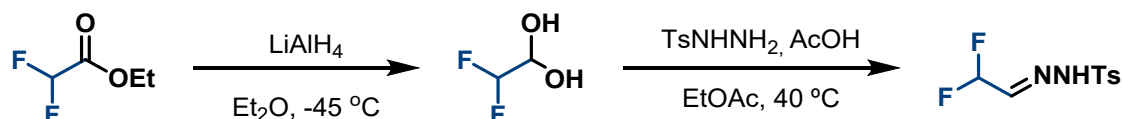

A 100 mL bottom flask was charged with  $\text{LiAlH}_4$  (750 mg, 20 mmol), evacuated and filled with argon for three times, followed by addition of dry  $\text{Et}_2\text{O}$  (40 mL) via syringe, under  $-45\text{ }^\circ\text{C}$ . Then ethyl difluoroacetate (9.3 g, 75 mmol) was added slowly, and the resulting mixture was allowed to stir overnight. The reaction was quenched by adding water and extracted three times with EA. The combined organic layer was dried with  $\text{Na}_2\text{SO}_4$ . Then 4-methylbenzenesulfonylhydrazide ( $\text{TsNHNH}_2$ ) (11.16 g, 60 mmol) and acetic acid (1 mL) were added and the mixture was stirred at  $40\text{ }^\circ\text{C}$  and monitored by TLC. After completion, the reaction mixture was concentrated under reduced pressure and the obtained crude solid was purified by column chromatography using PE/EA (5:1 to 4:1) as eluent to afford the product DFHZ-Ts as a white solid.

## III. General procedures for synthesis of 2,3-Functionalized Furans.

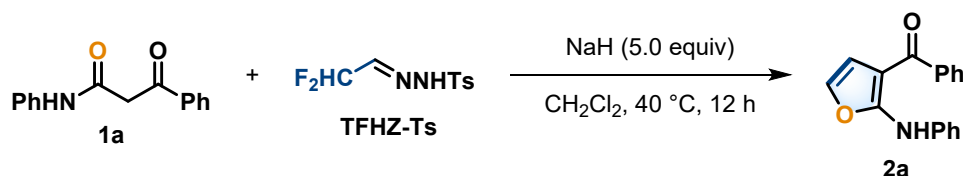

A Shrek reaction tube was charged with DFHZ-Ts (248 mg, 1.0 mmol), 3-Oxo-3-phenylpropionanilid

**1a** (119.5 mg, 0.5 mmol), NaH (60 % in oil, 100 mg, 2.5 mmol), evacuated and filled with argon for three times, followed by addition of dry CH<sub>2</sub>Cl<sub>2</sub> (5.0 mL) via syringe. The resulting mixture was allowed to stir at 40 °C until TLC showed complete consumption of **1a**. After the reaction was completed, the reaction mixture was evaporated under reduced pressure to leave a crude mixture, which was purified by column chromatography on silica gel to afford **2a** as a white solid (109 mg, 83% yield).

#### IV. Characterization data of prepared compounds.

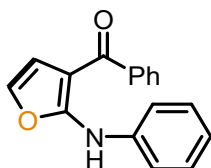

**Phenyl(2-(phenylamino)furan-3-yl)methanone (2a)**: White solid, mp: 64-65°C, <sup>1</sup>H NMR (600 MHz, CDCl<sub>3</sub>) δ 10.62 (s, 1H), 7.79 (d, *J* = 7.6 Hz, 2H), 7.52-7.50 (m, 1H), 7.50-7.44 (m, 4H), 7.36 (t, *J* = 7.2 Hz, 2H), 7.09 (t, *J* = 7.8 Hz, 1H), 6.92 (d, *J* = 2.4 Hz, 1H), 6.68 (d, *J* = 2.4 Hz, 1H). <sup>13</sup>C NMR (150 MHz, CDCl<sub>3</sub>) δ 188.6, 160.6, 139.8, 137.8, 132.8, 131.28, 129.4, 128.4, 128.1, 123.4, 118.7, 110.6, 99.1. IR (Film): 3493, 3057, 1622, 1592, 1247, 1146, 720 cm<sup>-1</sup>. HRMS (ESI) *m/z* calcd. for C<sub>17</sub>H<sub>13</sub>NNaO<sub>2</sub><sup>+</sup> [*M*+Na]<sup>+</sup>: 286.0838; Found: 286.0848.

---

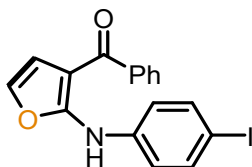

**2-((4-iodophenyl)amino)furan-3-yl(phenyl)methanone (2b)**. Yellow solid, mp: 80-81°C, <sup>1</sup>H NMR (600 MHz, CDCl<sub>3</sub>) δ 10.62 (s, 1H), 7.78 (d, *J* = 7.2 Hz, 2H), 7.64 (d, *J* = 8.4 Hz, 2H), 7.53 (t, *J* = 7.2 Hz, 1H), 7.48 (t, *J* = 7.2 Hz, 2H), 7.23 (d, *J* = 8.4 Hz, 2H), 6.94 (d, *J* = 2.4 Hz, 1H), 6.69 (d, *J* = 2.4 Hz, 1H). <sup>13</sup>C NMR (150 MHz, CDCl<sub>3</sub>) δ 188.8, 159.9, 139.6, 138.2, 137.6, 133.1, 131.3, 128.4, 128.0, 120.4, 110.6, 99.4, 86.0. IR (Film): 3404, 2958, 1607, 1509, 1248, 828, 698 cm<sup>-1</sup>. HRMS (ESI) *m/z* calcd. for C<sub>17</sub>H<sub>12</sub>INNaO<sub>2</sub><sup>+</sup> [*M*+Na]<sup>+</sup>: 411.9805; Found: 411.9811.

---

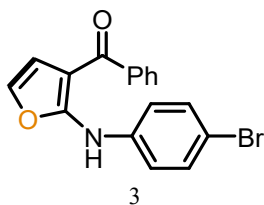

**(2-((4-bromophenyl)amino)furan-3-yl)(phenyl)methanone (2c).** Dark solid, mp: 77-78°C. **<sup>1</sup>H NMR** (600 MHz, CDCl<sub>3</sub>) δ 10.55 (s, 1H), 7.71 (d, *J* = 7.2 Hz, 2H), 7.46 (t, *J* = 7.2 Hz, 1H), 7.44-7.37 (m, 4H), 7.27 (d, *J* = 9.0 Hz, 2H), 6.87 (d, *J* = 2.4 Hz, 1H), 6.62 (d, *J* = 2.4 Hz, 1H). **<sup>13</sup>C NMR** (150 MHz, CDCl<sub>3</sub>) δ 187.8, 159.0, 138.6, 135.9, 132.0, 131.3, 130.3, 127.4, 127.0, 119.1, 114.8, 109.6, 98.4. **IR** (Film): 3358, 2925, 1587, 1563, 1376, 816, 696 cm<sup>-1</sup>. **HRMS** (ESI) *m/z* calcd. for C<sub>17</sub>H<sub>12</sub>BrNNaO<sub>2</sub><sup>+</sup> [M+Na]<sup>+</sup> : 363.9949; Found: 363.9942.

---

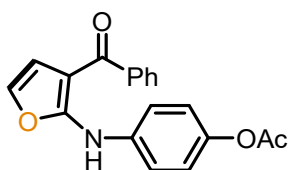

**4-((3-benzoylfuran-2-yl)amino)phenyl acetate (2d).** Yellow solid, mp: 84-85°C. **<sup>1</sup>H NMR** (600 MHz, CDCl<sub>3</sub>) δ 10.80 (s, 1H), 7.98 (d, *J* = 9.0 Hz, 2H), 7.80 (d, *J* = 7.2 Hz, 2H), 7.55 (t, *J* = 7.2 Hz, 1H), 7.53-7.47 (m, 4H), 7.02 (d, *J* = 2.4 Hz, 1H), 6.73 (d, *J* = 2.4 Hz, 1H), 2.58 (s, 3H). **<sup>13</sup>C NMR** (150 MHz, CDCl<sub>3</sub>) δ 196.6, 189.3, 159.3, 142.2, 139.43, 133.6, 131.8, 131.6, 130.3, 128.5, 128.1, 117.5, 110.7, 100.2, 26.4. **IR** (Film): 3383, 2927, 2203, 1607, 1172 cm<sup>-1</sup>. **HRMS** (ESI) *m/z* calcd. for C<sub>19</sub>H<sub>15</sub>NNaO<sub>4</sub><sup>+</sup> [M+Na]<sup>+</sup> : 344.0898; Found: 344.0901.

---

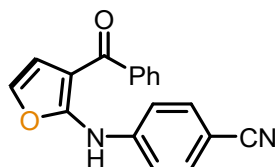

**4-((3-benzoylfuran-2-yl)amino)benzotrile (2e).** Yellow solid, mp: 99-100°C. **<sup>1</sup>H NMR** (500 MHz, CDCl<sub>3</sub>) δ 10.80 (s, 1H), 7.79 (d, *J* = 7.5 Hz, 2H), 7.63 (d, *J* = 8.0 Hz, 2H), 7.56 (t, *J* = 8.0 Hz, 1H), 7.46-7.54 (m, 4H), 7.03 (d, *J* = 2.5 Hz, 1H), 6.74 (d, *J* = 2.5 Hz, 1H). **<sup>13</sup>C NMR** (150 MHz, CDCl<sub>3</sub>) δ 189.5, 158.9, 141.8, 139.2, 133.8, 133.7, 131.7, 128.5, 128.1, 119.1, 118.1, 110.8, 105.6, 100.5. **IR** (Film): 3469, 2986, 1604, 1562, 737, 698 cm<sup>-1</sup>. **HRMS** (ESI) *m/z* calcd. for C<sub>18</sub>H<sub>12</sub>N<sub>2</sub>NaO<sub>2</sub><sup>+</sup> [M+Na]<sup>+</sup> : 311.0801; Found: 311.0799.

---

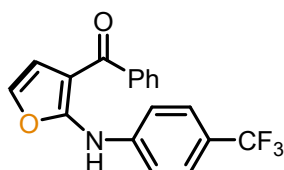

**Phenyl(2-((4-(trifluoromethyl)phenyl)amino)furan-3-yl)methanone (2f)**. Yellow solid, mp: 74-75°C. <sup>1</sup>H NMR (600 MHz, CDCl<sub>3</sub>) δ 10.75 (s, 1H), 7.79 (d, *J* = 7.2 Hz, 2H), 7.60 (d, *J* = 8.4 Hz, 2H), 7.56-7.51 (m, 3H), 7.49 (t, *J* = 7.2 Hz, 2H), 6.98 (d, *J* = 2.4 Hz, 1H), 6.71 (d, *J* = 2.4 Hz, 1H). <sup>13</sup>C NMR (150 MHz, CDCl<sub>3</sub>) δ 189.2, 159.5, 140.9, 139.5, 133.4, 131.5, 128.5, 128.1, 126.7 (q, *J* = 4.5 Hz), 124.8 (q, *J* = 33.0 Hz), 124.3 (q, *J* = 270.0 Hz), 117.9, 110.7, 100.0. IR (Film): 3415, 2958, 1756, 1662, 1376, 1049 cm<sup>-1</sup>. <sup>19</sup>F NMR (564 MHz, CDCl<sub>3</sub>) δ -63.29 (s). HRMS (ESI) *m/z* calcd. for C<sub>18</sub>H<sub>12</sub>F<sub>3</sub>NNaO<sub>2</sub><sup>+</sup> [M+Na]<sup>+</sup> : 354.0718; Found:354.0723.

---

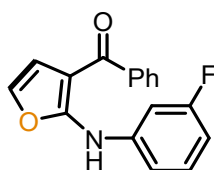

**2-((3-fluorophenyl)amino)furan-3-yl(phenyl)methanone (2g)**. Brown solid, mp: 43-44°C. <sup>1</sup>H NMR (600 MHz, CDCl<sub>3</sub>) δ 10.66 (s, 1H), 7.79 (d, *J* = 7.2 Hz, 2H), 7.54 (t, *J* = 7.2 Hz, 1H), 7.49 (t, *J* = 7.2 Hz, 2H), 7.28-7.34 (m, 2H), 7.15 (dd, *J* = 1.8 Hz, 7.8 Hz, 1H), 6.97 (d, *J* = 2.4 Hz, 1H), 6.78 (dt, *J* = 2.4 Hz, 8.4 Hz, 1H), 6.70 (d, *J* = 2.4 Hz, 1H). <sup>13</sup>C NMR (150 MHz, CDCl<sub>3</sub>) δ 189.0, 164.3, 162.6, 159.9, 139.6, 139.4 (d, *J* = 10.5 Hz), 133.2, 131.4, 130.5 (d, *J* = 10.5 Hz), 128.4, 128.1, 114.2, 110.6, 109.9 (d, *J* = 21.0 Hz), 105.7 (d, *J* = 25.5 Hz). <sup>19</sup>F NMR (564 MHz, CDCl<sub>3</sub>) δ -112.73--112.80 (m). IR (Film): 3415, 3029, 1625, 1473, 1185, 1048 cm<sup>-1</sup>. HRMS (ESI) *m/z* calcd. for C<sub>17</sub>H<sub>12</sub>FNNaO<sub>2</sub><sup>+</sup> [M+Na]<sup>+</sup>: 304.0708; Found: 304.0705.

---

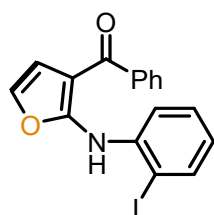

**2-((2-iodophenyl)amino)furan-3-yl(phenyl)methanone (2h)**. Yellow solid, mp: 72-73°C. <sup>1</sup>H NMR (600 MHz, CDCl<sub>3</sub>) δ 10.83 (s, 1H), 7.94 (d, *J* = 8.4 Hz, 1H), 7.87 (d, *J* = 7.8 Hz, 1H), 7.53 (t, *J* = 7.2 Hz, 1H), 7.48 (t, *J* = 7.2 Hz, 2H), 7.37 (t, *J* = 7.2 Hz, 2H), 6.96 (d, *J* = 1.8 Hz, 1H), 6.80 (t, *J* = 7.2 Hz, 1H), 6.71 (d, *J* = 1.8 Hz, 1H). <sup>13</sup>C NMR (150 MHz, CDCl<sub>3</sub>) δ 189.0, 159.5, 139.8, 139.6, 139.4, 133.0, 131.3, 129.2, 128.4, 128.2, 124.5, 118.6, 110.9, 100.1, 88.4. HRMS (ESI) *m/z* calcd. for C<sub>17</sub>H<sub>12</sub>INNaO<sub>2</sub><sup>+</sup> [M+Na]<sup>+</sup> : 411.9805; Found: 411.9807.

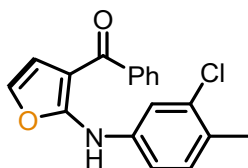

**(2-((3-chloro-4-methylphenyl)amino)furan-3-yl)(phenyl)methanone (2i).** Brown solid, mp: 87-88°C. <sup>1</sup>H NMR (600 MHz, CDCl<sub>3</sub>) δ 10.57 (s, 1H), 7.79 (d, *J* = 7.2 Hz, 2H), 7.56 (s, 1H), 7.53 (t, *J* = 7.2 Hz, 1H), 7.48 (t, *J* = 7.2 Hz, 2H), 7.22-7.16 (m, 1H), 6.94 (d, *J* = 2.4 Hz, 1H), 6.69 (d, *J* = 2.4 Hz, 1H), 2.35 (s, 3H). <sup>13</sup>C NMR (150 MHz, CDCl<sub>3</sub>) δ 188.8, 160.2, 139.7, 136.6, 134.9, 133.1, 131.4, 131.3, 130.8, 128.4, 128.1, 119.0, 117.1, 110.6, 99.2, 19.4. IR (Film): 3447, 3152, 3119, 2922, 1628, 1540 cm<sup>-1</sup>. HRMS (ESI) *m/z* calcd. for C<sub>18</sub>H<sub>14</sub>ClNNaO<sub>2</sub><sup>+</sup> [M+Na]<sup>+</sup> : 334.0611; Found: 334.0611.

---

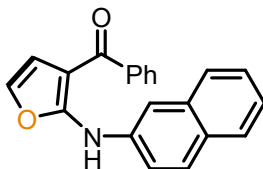

**(2-(naphthalen-2-ylamino)furan-3-yl)(phenyl)methanone (2j).** White solid, mp: 101-102°C. <sup>1</sup>H NMR (600 MHz, CDCl<sub>3</sub>) δ 10.74 (s, 1H), 7.93 (d, *J* = 1.8 Hz, 1H), 7.77-7.70 (m, 5H), 7.48-7.44 (m, 1H), 7.44-7.40 (m, 4H), 7.32 (t, *J* = 7.8 Hz, 1H), 6.93 (d, *J* = 2.4 Hz, 1H), 6.65 (d, *J* = 2.4 Hz, 1H). <sup>13</sup>C NMR (150 MHz, CDCl<sub>3</sub>) δ 188.7, 160.5, 139.8, 135.3, 134.2, 133.0, 131.2, 130.1, 129.3, 128.4, 128.1, 127.7, 127.3, 126.8, 124.7, 119.6, 114.3, 110.7, 99.5. IR (Film): 3853, 3162, 3055, 1621, 1588, 1543 cm<sup>-1</sup>. HRMS (ESI) *m/z* calcd. for C<sub>21</sub>H<sub>15</sub>NNaO<sub>2</sub><sup>+</sup> [M+Na]<sup>+</sup> : 336.1000; Found: 336.1001.

---

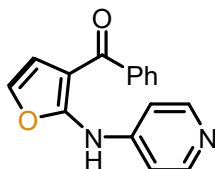

**Phenyl(2-(pyridin-4-ylamino)furan-3-yl)methanone (2k).** Yellow solid, mp: 69-70°C. <sup>1</sup>H NMR (600 MHz, CDCl<sub>3</sub>) δ 10.53 (s, 1H), 8.67 (d, *J* = 3.0 Hz, 1H), 8.26 (d, *J* = 4.8 Hz, 1H), 7.78-7.75 (m, 1H), 7.74-7.71 (m, 2H), 7.47 (t, *J* = 7.2 Hz, 1H), 7.42 (t, *J* = 7.8 Hz, 2H), 7.24-7.21 (m, 1H), 6.90 (d, *J* = 2.4 Hz, 1H), 6.65 (d, *J* = 2.4 Hz, 1H). <sup>13</sup>C NMR (150 MHz, CDCl<sub>3</sub>) δ 189.1, 159.9, 144.3, 140.5, 139.4, 134.8, 133.3, 131.5, 128.5, 128.1, 125.0, 123.8, 110.7, 99.8. IR (Film): 3568, 2920, 1632, 1458, 736, 698 cm<sup>-1</sup>. HRMS (ESI) *m/z* calcd. for C<sub>16</sub>H<sub>12</sub>N<sub>2</sub>NaO<sub>2</sub><sup>+</sup> [M+Na]<sup>+</sup> : 287.0793; Found: 287.0796.

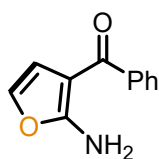

**(2-aminofuran-3-yl)(phenyl)methanone (2l).** Yellow solid, mp: 69-70°C. <sup>1</sup>H NMR (600 MHz, CDCl<sub>3</sub>) δ 7.76 (d, *J* = 7.2 Hz, 2H), 7.50 (t, *J* = 7.2 Hz, 1H), 7.46 (t, *J* = 7.2 Hz, 2H), 6.73 (d, *J* = 2.4 Hz, 1H), 6.55 (d, *J* = 2.4 Hz, 1H), 6.45 (s, 2H). <sup>13</sup>C NMR (150 MHz, CDCl<sub>3</sub>) δ 189.0, 164.1, 140.0, 132.1, 131.0, 128.3, 128.0, 110.7, 98.1. IR (Film): 3461, 2952, 1758, 1628, 1540, 1187 cm<sup>-1</sup>. HRMS (ESI) *m/z* calcd. for C<sub>11</sub>H<sub>9</sub>NO<sub>2</sub><sup>+</sup> [M+Na]<sup>+</sup>: 210.0531; Found: 210.0523.

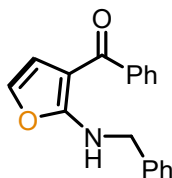

**(2-(benzylamino)furan-3-yl)(phenyl)methanone (2m).** Yellow solid, mp: 52-53°C. <sup>1</sup>H NMR (600 MHz, CDCl<sub>3</sub>) δ 8.64 (s, 1H), 7.74 (d, *J* = 7.8 Hz, 2H), 7.57-7.27 (m, 8H), 6.74 (d, *J* = 2.4 Hz, 1H), 6.58 (d, *J* = 2.4 Hz, 1H), 4.66 (d, *J* = 6.0 Hz, 2H). <sup>13</sup>C NMR (150 MHz, CDCl<sub>3</sub>) δ 187.8, 164.6, 140.3, 137.8, 132.2, 130.8, 128.8, 128.3, 128.0, 127.7, 127.4, 110.9, 97.3, 46.0. IR (Film): 3420, 3109, 2949, 1643, 752, 697 cm<sup>-1</sup>. HRMS (ESI) *m/z* calcd. for C<sub>18</sub>H<sub>15</sub>NNaO<sub>2</sub><sup>+</sup> [M+Na]<sup>+</sup>: 300.1000; Found: 300.1007.

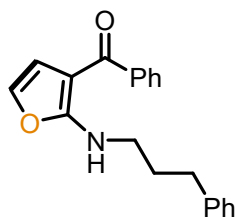

**Phenyl(2-((3-phenylpropyl)amino)furan-3-yl)methanone (2n).** Yellow solid, mp: 78-79°C. <sup>1</sup>H NMR (600 MHz, CDCl<sub>3</sub>) δ 8.39 (s, 1H), 7.76-7.72 (m, 2H), 7.49-7.42 (m, 3H), 7.30 (t, *J* = 7.8 Hz, 2H), 7.24-7.20 (m, 3H), 6.73 (d, *J* = 2.4 Hz, 1H), 6.56 (d, *J* = 2.4 Hz, 1H), 3.49 (q, *J* = 7.8 Hz, 2H), 2.75 (t, *J* = 7.8 Hz, 2H), 2.07-1.99 (m, 2H). <sup>13</sup>C NMR (150 MHz, CDCl<sub>3</sub>) δ 187.6, 165.0, 141.1, 140.4, 132.0, 130.6, 128.5, 128.4, 128.3, 127.9, 126.1, 110.8, 97.1, 41.4, 32.9, 31.6. IR (Film): 3502, 2998, 1740, 1667, 1241, 870 cm<sup>-1</sup>. HRMS (ESI) *m/z* calcd. for C<sub>20</sub>H<sub>19</sub>NNaO<sub>2</sub><sup>+</sup> [M+Na]<sup>+</sup>: 328.1314; Found: 328.1313.

---

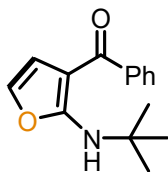

**(2-(tert-butylamino)furan-3-yl)(phenyl)methanone (2o).** Yellow oil,  $^1\text{H NMR}$  (600 MHz,  $\text{CDCl}_3$ )  $\delta$  8.63 (s, 1H), 7.65 (d,  $J = 7.2$  Hz, 2H), 7.41-7.33 (m, 3H), 6.67 (d,  $J = 2.4$  Hz, 1H), 6.47 (d,  $J = 2.4$  Hz, 1H), 1.41 (s, 9H).  $^{13}\text{C NMR}$  (150 MHz,  $\text{CDCl}_3$ )  $\delta$  187.3, 164.7, 140.5, 132.1, 130.5, 128.2, 127.9, 110.4, 97.6, 52.5, 29.8. **HRMS** (ESI)  $m/z$  calcd. for  $\text{C}_{15}\text{H}_{17}\text{NNaO}_2^+$   $[\text{M}+\text{Na}]^+$ : 266.1151; Found: 266.1157.

---

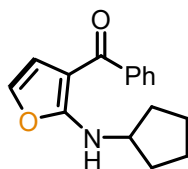

**(2-(cyclopentylamino)furan-3-yl)(phenyl)methanone (2p).** Yellow oil.  $^1\text{H NMR}$  (600 MHz,  $\text{CDCl}_3$ )  $\delta$  8.35 (d,  $J = 6.2$  Hz, 1H), 7.75-7.71 (m, 2H), 7.51-7.40 (m, 3H), 6.73 (d,  $J = 2.4$  Hz, 1H), 6.55 (d,  $J = 2.4$  Hz, 1H), 4.25-4.14 (m, 1H), 2.14-2.03 (m, 2H), 1.84-1.75 (m, 2H), 1.70-1.58 (m, 4H).  $^{13}\text{C NMR}$  (150 MHz,  $\text{CDCl}_3$ )  $\delta$  187.3, 164.6, 140.4, 132.1, 130.6, 128.2, 127.9, 110.7, 97.0, 53.8, 33.8, 23.7. **IR** (Film): 3362, 2930, 1724, 1598, 1137, 848, 737  $\text{cm}^{-1}$ . **HRMS** (ESI)  $m/z$  calcd. for  $\text{C}_{16}\text{H}_{17}\text{NNaO}_2^+$   $[\text{M}+\text{Na}]^+$ : 278.1156; Found: 278.1153.

---

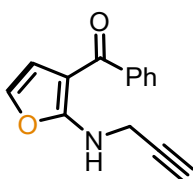

**Phenyl(2-(prop-2-yn-1-ylamino)furan-3-yl)methanone (2q).** Yellow oil.  $^1\text{H NMR}$  (600 MHz,  $\text{CDCl}_3$ )  $\delta$  8.22 (s, 1H), 7.67 (d,  $J = 7.2$  Hz, 2H), 7.42 (t,  $J = 7.2$  Hz, 1H), 7.38 (t,  $J = 7.2$  Hz, 2H), 6.74 (d,  $J = 2.4$  Hz, 1H), 6.52 (d,  $J = 2.4$  Hz, 1H), 4.20-4.17 (m, 2H), 2.23 (s, 1H).  $^{13}\text{C NMR}$  (150 MHz,  $\text{CDCl}_3$ )  $\delta$  187.2, 162.6, 139.0, 131.6, 129.9, 127.3, 126.9, 109.9, 96.7, 78.2, 71.0, 30.6. **IR** (Film): 3458, 3192, 2983, 1740, 1624, 1587, 739, 693  $\text{cm}^{-1}$ . **HRMS** (ESI)  $m/z$  calcd. for  $\text{C}_{14}\text{H}_{11}\text{NNaO}_2^+$   $[\text{M}+\text{Na}]^+$ : 248.0682; Found: 248.0667.

---



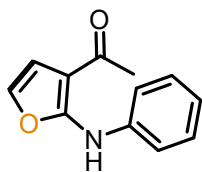

**1-(2-(phenylamino)furan-3-yl)ethan-1-one (2r).** Yellow oil.  $^1\text{H NMR}$  (600 MHz,  $\text{CDCl}_3$ )  $\delta$  10.04 (s, 1H), 7.39 (d,  $J = 7.8$  Hz, 2H), 7.33 (t,  $J = 7.8$  Hz, 2H), 7.06 (t,  $J = 7.2$  Hz, 1H), 6.88 (d,  $J = 2.4$  Hz, 1H), 6.56 (d,  $J = 2.4$  Hz, 1H), 2.35 (s, 3H).  $^{13}\text{C NMR}$  (150 MHz,  $\text{CDCl}_3$ )  $\delta$  192.5, 158.4, 138.0, 132.5, 129.3, 123.1, 118.4, 109.5, 100.1, 27.1. **IR** (Film): 3422, 3181, 2954, 1625, 1473, 1185, 1048  $\text{cm}^{-1}$ . **HRMS** (ESI)  $m/z$  calcd. for  $\text{C}_{12}\text{H}_{11}\text{NNaO}_2^+$   $[\text{M}+\text{Na}]^+$ : 224.0688; Found: 224.0794.

---

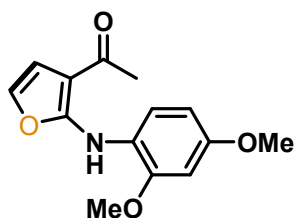

**1-(2-((2,4-dimethoxyphenyl)amino)furan-3-yl)ethan-1-one (2s).** Brown solid, mp: 72-73°C.  $^1\text{H NMR}$  (600 MHz,  $\text{CDCl}_3$ )  $\delta$  10.29 (s, 1H), 7.72 (d,  $J = 9.0$  Hz, 1H), 6.85 (d,  $J = 2.4$  Hz, 1H), 6.55 (d,  $J = 2.4$  Hz, 1H), 6.53 (d,  $J = 2.4$  Hz, 1H), 6.48 (dd,  $J = 2.4$  Hz,  $J = 8.4$  Hz, 2H), 3.93 (s, 3H), 3.81 (s, 3H), 2.34 (s, 3H).  $^{13}\text{C NMR}$  (150 MHz,  $\text{CDCl}_3$ )  $\delta$  191.7, 158.7, 156.0, 149.3, 132.1, 121.5, 117.9, 109.6, 103.9, 99.9, 99.0, 56.0, 55.6, 26.8. **IR** (Film): 3462, 3126, 3031, 2924, 1590, 1318, 737  $\text{cm}^{-1}$ . **HRMS** (ESI)  $m/z$  calcd. for  $\text{C}_{14}\text{H}_{15}\text{NNaO}_4^+$   $[\text{M}+\text{Na}]^+$ : 284.0893; Found: 284.0902.

---

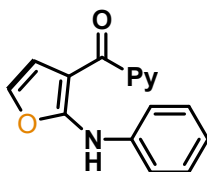

**(2-(phenylamino)furan-3-yl)(pyridin-2-yl)methanone (2t).** Yellow solid, mp: 86-87°C.  $^1\text{H NMR}$  (600 MHz,  $\text{CDCl}_3$ )  $\delta$  10.59 (s, 1H), 8.78 (d,  $J = 4.2$  Hz, 2H), 7.61-7.58 (m, 2H), 7.46 (d,  $J = 7.8$  Hz, 2H), 7.38 (t,  $J = 8.4$  Hz, 2H), 7.13 (t,  $J = 7.2$  Hz, 1H), 6.92 (d,  $J = 2.4$  Hz, 1H), 6.60 (d,  $J = 2.4$  Hz, 1H).  $^{13}\text{C NMR}$  (150 MHz,  $\text{CDCl}_3$ )  $\delta$  186.0, 161.0, 150.4, 146.4, 137.3, 133.5, 129.5, 124.0, 121.7, 119.0, 109.8, 99.0. **HRMS** (ESI)  $m/z$  calcd. for  $\text{C}_{16}\text{H}_{12}\text{N}_2\text{NaO}_2^+$   $[\text{M}+\text{Na}]^+$ : 287.0793; Found: 287.0796.

---

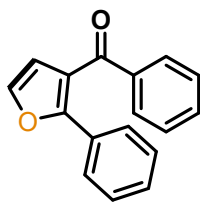

**Phenyl(2-phenylfuran-3-yl)methanone (4a).** Yellow oil.  $^1\text{H NMR}$  (600 MHz,  $\text{CDCl}_3$ )  $\delta$  7.83 (dd,  $J = 1.2$  Hz, 8.4 Hz, 2H), 7.67-7.71 (m, 2H), 7.48-7.52 (m, 2H), 7.37 (t,  $J = 8.4$  Hz, 2H), 7.27-7.32 (m, 2H), 7.29 (d,  $J = 1.8$  Hz, 1H), 6.70 (d,  $J = 1.8$  Hz, 1H).  $^{13}\text{C NMR}$  (150 MHz,  $\text{CDCl}_3$ )  $\delta$  191.8, 156.0, 141.3, 138.0, 132.8, 129.8, 129.8, 129.0, 128.3, 127.5, 120.9, 113.8. **IR** (Film): 2923, 1712, 1628, 1540, 1186  $\text{cm}^{-1}$ . **HRMS** (ESI)  $m/z$  calcd. for  $\text{C}_{17}\text{H}_{12}\text{NaO}_2^+$   $[\text{M}+\text{Na}]^+$ : 271.0738; Found: 271.0736.

---

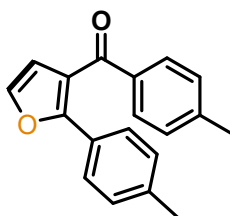

**4-tolyl(2-(p-tolyl)furan-3-yl)methanone (4b).** Yellow oil,  $^1\text{H NMR}$  (600 MHz,  $\text{CDCl}_3$ )  $\delta$  7.75 (d,  $J = 7.8$  Hz, 2H), 7.61 (d,  $J = 8.4$  Hz, 2H), 7.45 (d,  $J = 1.8$  Hz, 1H), 7.18 (d,  $J = 7.8$  Hz, 2H), 7.11 (d,  $J = 7.8$  Hz, 2H), 6.64 (d,  $J = 2.4$  Hz, 1H), 2.38 (s, 3H), 2.32 (s, 3H).  $^{13}\text{C NMR}$  (150 MHz,  $\text{CDCl}_3$ )  $\delta$  191.6, 155.9, 143.6, 140.8, 139.0, 135.6, 130.0, 129.1, 127.3, 120.4, 113.8, 21.7, 21.4. **IR** (Film): 2998, 1762, 1375, 1059, 735, 694  $\text{cm}^{-1}$ . **HRMS** (ESI)  $m/z$  calcd. for  $\text{C}_{19}\text{H}_{16}\text{NaO}_2^+$   $[\text{M}+\text{Na}]^+$ : 299.1043; Found: 299.1036.

---

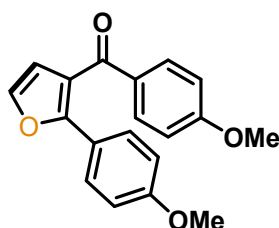

**(4-methoxyphenyl)(2-(4-methoxyphenyl)furan-3-yl)methanone (4c).** White solid, mp: 68-69°C.  $^1\text{H NMR}$  (600 MHz,  $\text{CDCl}_3$ )  $\delta$  7.85 (d,  $J = 8.4$  Hz, 2H), 7.67 (d,  $J = 1.8$  Hz, 8.4 Hz, 2H), 7.50 (t,  $J = 7.2$  Hz, 4H), 7.37 (t,  $J = 7.8$  Hz, 4H), 7.44 (d,  $J = 1.8$  Hz, 1H), 6.85 (dd,  $J = 9.0$  Hz, 19.8 Hz, 4H), 6.64 (d,  $J = 1.8$  Hz, 1H), 3.84 (s, 3H), 3.79 (s, 3H).  $^{13}\text{C NMR}$  (150 MHz,  $\text{CDCl}_3$ )  $\delta$  190.6, 163.4, 160.1, 155.5, 140.5, 132.1, 131.0, 128.9, 122.7, 113.8, 113.7, 113.6, 55.5, 55.3. **IR** (Film): 3447, 3152, 3119, 2922, 1628, 1540  $\text{cm}^{-1}$ . **HRMS** (ESI)  $m/z$  calcd. for  $\text{C}_{19}\text{H}_{16}\text{NaO}_4^+$   $[\text{M}+\text{Na}]^+$ : 331.0941; Found: 331.0947.

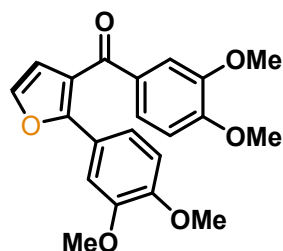

**(3,4-dimethoxyphenyl)(2-(3,4-dimethoxyphenyl)furan-3-yl)methanone (4d).** White solid, mp: 85-86°C. <sup>1</sup>H NMR (600 MHz, CDCl<sub>3</sub>) δ 7.43-7.46 (m, 3H), 7.29 (dd, *J* = 1.8 Hz, 8.4 Hz, 1H), 7.24 (d, *J* = 1.8 Hz, 1H), 6.81-6.76 (m, 2H), 6.67 (d, *J* = 1.8 Hz, 1H), 3.89 (s, 3H), 3.85 (s, 3H), 3.82 (s, 3H), 3.76 (s, 3H). <sup>13</sup>C NMR (150 MHz, CDCl<sub>3</sub>) δ 190.5, 155.1, 153.2, 149.7, 148.9, 148.6, 140.6, 131.0, 124.9, 122.9, 120.4, 120.0, 113.9, 111.8, 110.9, 110.8, 110.0, 56.1, 56.0, 55.9, 55.8. IR (Film): 2992, 1762, 1649, 1555, 1159 cm<sup>-1</sup>. HRMS (ESI) *m/z* calcd. for C<sub>19</sub>H<sub>16</sub>NaO<sub>4</sub><sup>+</sup> [M+Na]<sup>+</sup>: 331.0941; Found: 331.0947.

---

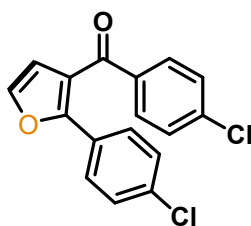

**(4-chlorophenyl)(2-(4-chlorophenyl)furan-3-yl)methanone (4e).** White solid, mp: 74-75°C. <sup>1</sup>H NMR (600 MHz, CDCl<sub>3</sub>) δ 7.69 (d, *J* = 8.4 Hz, 2H), 7.60 (d, *J* = 8.4 Hz, 2H), 7.41 (d, *J* = 1.8 Hz, 1H), 7.29 (d, *J* = 8.4 Hz, 2H), 7.21 (d, *J* = 8.4 Hz, 2H), 6.56 (d, *J* = 1.8 Hz, 1H). <sup>13</sup>C NMR (150 MHz, CDCl<sub>3</sub>) δ 190.2, 155.0, 141.5, 139.5, 136.3, 135.3, 131.1, 128.8, 128.7, 128.7, 128.1, 120.8, 113.8. IR (Film): 2937, 1711, 1660, 1598, 1427, 1265 cm<sup>-1</sup>. HRMS (ESI) *m/z* calcd. for C<sub>17</sub>H<sub>10</sub>Cl<sub>2</sub>NaO<sub>2</sub><sup>+</sup> [M+Na]<sup>+</sup>: 338.9968; Found: 338.9972.

---

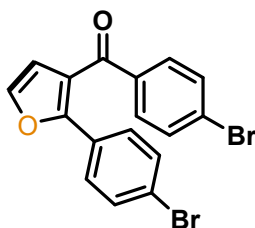

**(4-bromophenyl)(2-(4-bromophenyl)furan-3-yl)methanone (4f).** White solid, mp: 81-82°C. <sup>1</sup>H NMR (600 MHz, CDCl<sub>3</sub>) δ 7.63 (d, *J* = 8.4 Hz, 2H), 7.55 (d, *J* = 8.4 Hz, 2H), 7.49 (d, *J* = 8.4 Hz, 2H),

7.44 (d,  $J = 1.8$  Hz, 1H), 7.40 (d,  $J = 8.4$  Hz, 2H), 6.58 (d,  $J = 1.8$  Hz, 1H).  $^{13}\text{C}$  NMR (150 MHz,  $\text{CDCl}_3$ )  $\delta$  190.4, 155.1, 141.6, 136.7, 131.8, 128.9, 128.5, 128.2, 123.6, 120.8, 113.8. IR (Film): 2993, 1764, 1377, 1241  $\text{cm}^{-1}$ . HRMS (ESI)  $m/z$  calcd. for  $\text{C}_{17}\text{H}_{10}\text{Br}_2\text{NaO}_2^+$   $[\text{M}+\text{Na}]^+$ : 426.8945; Found: 426.8943.

---

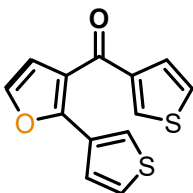

**Thiophen-3-yl(2-(thiophen-3-yl)furan-3-yl)methanone (4g)**. Brown oil.  $^1\text{H}$  NMR (600 MHz,  $\text{CDCl}_3$ )  $\delta$  8.17 (dd,  $J = 1.2$  Hz, 3.0 Hz, 1H), 7.96 (dd,  $J = 1.2$  Hz, 3.0 Hz, 1H), 7.59-7.53 (m, 1H), 7.43 (d,  $J = 1.8$  Hz, 1H), 7.35-7.32 (m, 1H), 7.31-7.29 (m, 1H), 6.76 (d,  $J = 2.4$  Hz, 1H).  $^{13}\text{C}$  NMR (150 MHz,  $\text{CDCl}_3$ )  $\delta$  184.3, 152.9, 142.8, 140.3, 133.4, 130.9, 128.0, 126.7, 126.2, 125.5, 125.5, 120.5, 113.2. IR (Film): 2983, 1651, 1432, 1226, 1100, 769  $\text{cm}^{-1}$ . HRMS (ESI)  $m/z$  calcd. for  $\text{C}_{13}\text{H}_8\text{NaO}_2\text{S}_2^+$   $[\text{M}+\text{Na}]^+$ : 282.9861; Found: 282.9864.

---

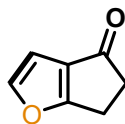

**5,6-dihydro-4H-cyclopenta[b]furan-4-one (4h)**. Colorless oil.  $^1\text{H}$  NMR (600 MHz,  $\text{CDCl}_3$ )  $\delta$  7.52 (d,  $J = 1.8$  Hz, 1H), 6.53 (d,  $J = 1.8$  Hz, 1H), 3.03-2.97 (m, 9.0 Hz, 4H).  $^{13}\text{C}$  NMR (150 MHz,  $\text{CDCl}_3$ )  $\delta$  195.3, 183.0, 149.6, 128.1, 105.3, 42.1, 22.2. IR (Film): 2952, 1763, 1676, 1377, 1055  $\text{cm}^{-1}$ . HRMS (ESI)  $m/z$  calcd. for  $\text{C}_7\text{H}_6\text{NaO}_2^+$   $[\text{M}+\text{Na}]^+$ : 145.0265; Found: 145.0271.

---

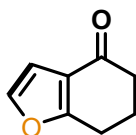

**6,7-dihydrobenzofuran-4(5H)-one (4i)**. colorless oil.  $^1\text{H}$  NMR (600 MHz,  $\text{CDCl}_3$ )  $\delta$  7.30 (d,  $J = 1.8$  Hz, 1H), 6.65 (d,  $J = 1.8$  Hz, 1H), 2.86 (t,  $J = 6.0$  Hz, 2H), 2.48 (t,  $J = 6.0$  Hz, 2H), 2.13-2.19 (m, 2H).  $^{13}\text{C}$  NMR (150 MHz,  $\text{CDCl}_3$ )  $\delta$  194.5, 167.1, 142.6, 121.1, 106.5, 37.7, 23.4, 22.6. IR (Film): 3122, 3028, 2899, 1678, 1448, 1119  $\text{cm}^{-1}$ . HRMS (ESI)  $m/z$  calcd. for  $\text{C}_8\text{H}_8\text{NaO}_2^+$   $[\text{M}+\text{Na}]^+$ : 159.0422; Found: 159.0421.

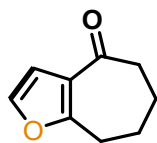

**5,6,7,8-tetrahydro-4H-cyclohepta[b]furan-4-one (4j).** Yellow oil.  $^1\text{H NMR}$  (600 MHz,  $\text{CDCl}_3$ )  $\delta$  7.23 (d,  $J = 1.8$  Hz, 1H), 6.71 (d,  $J = 1.8$  Hz, 1H), 2.95 (t,  $J = 6.6$  Hz, 2H), 2.67 (t,  $J = 6.0$  Hz, 2H), 1.99-1.91 (m, 2H), 1.89-1.83 (m, 2H).  $^{13}\text{C NMR}$  (150 MHz,  $\text{CDCl}_3$ )  $\delta$  196.6, 161.8, 141.1, 123.6, 110.4, 44.5, 29.6, 24.9, 22.9. **IR** (Film): 2984, 1764, 1659, 1598, 1269  $\text{cm}^{-1}$ . **HRMS** (ESI)  $m/z$  calcd. for  $\text{C}_9\text{H}_{10}\text{NaO}_2^+$   $[\text{M}+\text{Na}]^+$ : 173.0584; Found: 173.0577.

---

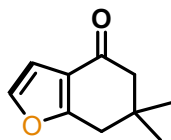

**6,6-dimethyl-6,7-dihydrobenzofuran-4(5H)-one (4k).** Colorless oil.  $^1\text{H NMR}$  (600 MHz,  $\text{CDCl}_3$ )  $\delta$  7.31 (d,  $J = 1.8$  Hz, 1H), 6.65 (d,  $J = 1.8$  Hz, 1H), 2.73 (s, 3H), 2.36 (s, 3H), 1.12 (s, 6H).  $^{13}\text{C NMR}$  (150 MHz,  $\text{CDCl}_3$ )  $\delta$  194.0, 166.3, 142.9, 119.9, 106.3, 52.1, 37.4, 35.3, 28.6. **IR** (Film): 2958, 1756, 1662, 1376, 1049  $\text{cm}^{-1}$ . **HRMS** (ESI)  $m/z$  calcd. for  $\text{C}_{10}\text{H}_{12}\text{NaO}_2^+$   $[\text{M}+\text{Na}]^+$ : 187.0740; Found: 187.0738.

---

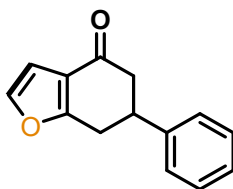

**6-phenyl-6,7-dihydrobenzofuran-4(5H)-one (4l).** Colorless oil.  $^1\text{H NMR}$  (600 MHz,  $\text{CDCl}_3$ )  $\delta$  7.24-7.30 (m, 2H), 7.18-7.22 (m, 3H), 6.71 (d,  $J = 1.8$  Hz, 1H), 3.60-3.50 (m, 1H), 3.22-3.15 (m, 1H), 3.09-3.01 (m, 1H), 2.79-2.74 (m, 2H).  $^{13}\text{C NMR}$  (150 MHz,  $\text{CDCl}_3$ )  $\delta$  193.0, 166.3, 143.1, 142.5, 128.9, 127.3, 126.8, 121.1, 106.5, 45.0, 41.4, 31.2. **IR** (Film): 2933, 1662, 1508, 1243, 736, 691  $\text{cm}^{-1}$ . **HRMS** (ESI)  $m/z$  calcd. for  $\text{C}_{14}\text{H}_{12}\text{NaO}_2^+$   $[\text{M}+\text{Na}]^+$ : 235.0745; Found: 235.0756.

---

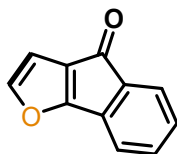

**4H-indeno[1,2-b]furan-4-one (4m).** White solid, mp: 63-64°C.  $^1\text{H NMR}$  (600 MHz,  $\text{CDCl}_3$ )  $\delta$  7.43 (d,  $J = 7.2$  Hz, 1H), 7.41 (d,  $J = 1.8$  Hz, 1H), 7.29 (t,  $J = 7.8$  Hz, 1H), 7.18 (t,  $J = 7.8$  Hz, 1H), 7.11 (d,  $J = 7.2$  Hz, 1H), 6.50 (d,  $J = 1.8$  Hz, 1H).  $^{13}\text{C NMR}$  (150 MHz,  $\text{CDCl}_3$ )  $\delta$  185.2, 175.4, 148.3, 138.4, 134.1, 133.0, 129.1, 123.8, 123.6, 117.2, 106.9. **IR** (Film): 2957, 1650, 1487, 1376, 1149  $\text{cm}^{-1}$ . **HRMS** (ESI)  $m/z$  calcd. for  $\text{C}_{11}\text{H}_6\text{NaO}_2^+$   $[\text{M}+\text{Na}]^+$ : 193.0263; Found: 193.0265.

---

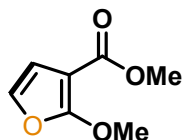

**Methyl 2-methoxyfuran-3-carboxylate (4n),** colorless oil.  $^1\text{H NMR}$  (600 MHz,  $\text{CDCl}_3$ )  $\delta$  6.84 (d,  $J = 2.4$  Hz, 1H), 6.61 (d,  $J = 1.8$  Hz, 1H), 4.11 (s, 3H), 3.80 (s, 3H).  $^{13}\text{C NMR}$  (150 MHz,  $\text{CDCl}_3$ )  $\delta$  163.5, 162.2, 132.2, 111.8, 91.0, 58.0, 51.3. **IR** (Film): 2933, 1651, 1482, 1444, 1262, 892, 728, 685  $\text{cm}^{-1}$ . **HRMS** (ESI)  $m/z$  calcd. for  $\text{C}_7\text{H}_8\text{NaO}_4^+$   $[\text{M}+\text{Na}]^+$ : 179.0320; Found: 179.0319.

---

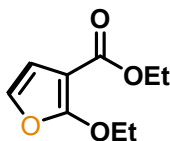

**Ethyl 2-ethoxyfuran-3-carboxylate (4o),** colorless oil.  $^1\text{H NMR}$  (600 MHz,  $\text{CDCl}_3$ )  $\delta$  6.81 (d,  $J = 1.8$  Hz, 1H), 6.58 (d,  $J = 1.8$  Hz, 1H), 4.42 (q,  $J = 7.2$  Hz, 2H), 4.25 (q,  $J = 7.2$  Hz, 2H), 1.43 (t,  $J = 7.2$  Hz, 3H), 1.31 (t,  $J = 7.2$  Hz, 3H).  $^{13}\text{C NMR}$  (150 MHz,  $\text{CDCl}_3$ )  $\delta$  163.1, 162.0, 132.1, 111.6, 92.3, 67.9, 59.8, 15.0, 14.4. **HRMS** (ESI)  $m/z$  calcd. for  $\text{C}_9\text{H}_{12}\text{NaO}_4^+$   $[\text{M}+\text{Na}]^+$ : 207.0633; Found: 207.0632.

---

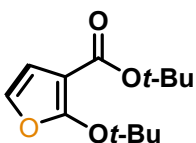

**Tert-butyl 2-(tert-butoxy)furan-3-carboxylate (4p),** Yellow oil.  $^1\text{H NMR}$  (600 MHz,  $\text{CDCl}_3$ )  $\delta$  6.85 (d,  $J = 2.4$  Hz, 1H), 6.55 (d,  $J = 2.4$  Hz, 1H), 1.53 (s, 9H), 1.46 (s, 9H).  $^{13}\text{C NMR}$  (150 MHz,  $\text{CDCl}_3$ )  $\delta$  161.7, 158.7, 132.2, 110.2, 99.1, 84.8, 79.1, 27.7, 27.4. **IR** (Film): 3031, 2927, 1651, 1502, 1257, 898, 810, 693  $\text{cm}^{-1}$ . **HRMS** (ESI)  $m/z$  calcd. for  $\text{C}_{13}\text{H}_{20}\text{NaO}_4^+$   $[\text{M}+\text{Na}]^+$ : 263.1265; Found: 263.1262.

---

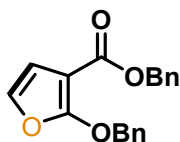

**Benzyl 2-(benzyloxy)furan-3-carboxylate (4q).** Yellow oil.  $^1\text{H NMR}$  (600 MHz,  $\text{CDCl}_3$ )  $\delta$  7.39-7.44 (m, 4H), 7.31-7.38 (s, 6H), 6.85 (d,  $J = 2.4$  Hz, 1H), 6.66 (d,  $J = 2.4$  Hz, 1H), 5.40 (s, 2H), 5.28 (s, 2H).  $^{13}\text{C NMR}$  (150 MHz,  $\text{CDCl}_3$ )  $\delta$  162.8, 161.8, 136.5, 135.2, 132.7, 128.64, 128.60, 128.5, 128.4, 127.99, 127.95, 111.7, 92.7, 73.2, 65.7. **IR** (Film): 3267, 2985, 1742, 1688, 1266, 1189  $\text{cm}^{-1}$ . **HRMS** (ESI)  $m/z$  calcd. for  $\text{C}_{19}\text{H}_{16}\text{NaO}_4^+$   $[\text{M}+\text{Na}]^+$  : 331.0942; Found: 331.0946.

---

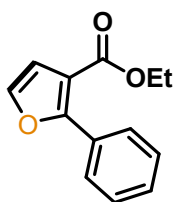

**Ethyl 2-phenylfuran-3-carboxylate (4r).** Yellow liquid.  $^1\text{H NMR}$  (600 MHz,  $\text{CDCl}_3$ )  $\delta$  7.98 (d,  $J = 7.8$  Hz, 2H), 7.38-7.47 (m, 3H), 7.43 (d,  $J = 1.8$  Hz, 1H), 6.86 (d,  $J = 1.8$  Hz, 1H), 4.31 (q,  $J = 7.2$  Hz, 2H), 1.34 (t,  $J = 7.2$  Hz, 2H).  $^{13}\text{C NMR}$  (150 MHz,  $\text{CDCl}_3$ )  $\delta$  162.6, 156.4, 140.2, 128.8, 128.3, 127.4, 127.0, 112.9, 112.0, 59.5, 13.2. **HRMS** (ESI)  $m/z$  calcd. for  $\text{C}_{13}\text{H}_{12}\text{NaO}_3^+$   $[\text{M}+\text{Na}]^+$  : 239.0684; Found: 239.0687.

---

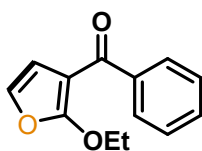

**(2-ethoxyfuran-3-yl)(phenyl)methanone (4r').** Yellow liquid.  $^1\text{H NMR}$  (600 MHz,  $\text{CDCl}_3$ )  $\delta$  7.75 (d,  $J = 8.4$  Hz, 2H), 7.51 (t,  $J = 7.2$  Hz, 1H), 7.42 (t,  $J = 7.2$  Hz, 2H), 6.89 (d,  $J = 2.4$  Hz, 1H), 6.69 (d,  $J = 2.4$  Hz, 1H), 5.40 (s, 2H), 5.28 (s, 2H).  $^{13}\text{C NMR}$  (150 MHz,  $\text{CDCl}_3$ )  $\delta$  189.1, 162.0, 139.3, 132.6, 131.6, 128.7, 127.9, 112.5, 100.4, 67.8, 14.8. **HRMS** (ESI)  $m/z$  calcd. for  $\text{C}_{13}\text{H}_{13}\text{O}_3^+$   $[\text{M}+\text{H}]^+$  : 217.0859; Found: 217.0869.

---

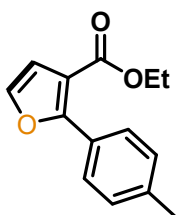

**Ethyl 2-(p-tolyl)furan-3-carboxylate (4s).** Yellow liquid.  $^1\text{H NMR}$  (600 MHz,  $\text{CDCl}_3$ )  $\delta$  7.78 (d,  $J = 8.4$  Hz, 2H), 7.29 (d,  $J = 1.2$  Hz, 1H), 7.14 (d,  $J = 7.8$  Hz, 2H), 6.73 (d,  $J = 1.2$  Hz, 1H), 4.20 (q,  $J = 7.2$  Hz, 2H), 2.29 (s, 3H), 1.23 (t,  $J = 7.2$  Hz, 3H).  $^{13}\text{C NMR}$  (150 MHz,  $\text{CDCl}_3$ )  $\delta$  162.6, 156.8, 139.8, 138.4, 127.7, 127.2, 126.0, 112.3, 111.8, 59.4, 20.4, 13.2. **IR** (Film): 2925, 1632, 1425, 1093, 725, 691  $\text{cm}^{-1}$ . **HRMS** (ESI)  $m/z$  calcd. for  $\text{C}_{14}\text{H}_{14}\text{NaO}_3^+$   $[\text{M}+\text{Na}]^+$  : 253.0841; Found:253.0841.

---

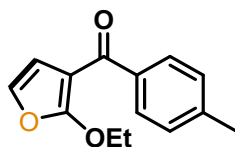

**(2-ethoxyfuran-3-yl)(p-tolyl)methanone (4s').** Yellow liquid.  $^1\text{H NMR}$  (600 MHz,  $\text{CDCl}_3$ )  $\delta$  7.69 (d,  $J = 7.8$  Hz, 2H), 7.23 (d,  $J = 7.8$  Hz, 1H), 6.89 (d,  $J = 2.4$  Hz, 1H), 6.68 (d,  $J = 2.4$  Hz, 1H), 4.38 (q,  $J = 7.2$  Hz, 2H), 2.41 (s, 3H), 1.35 (t,  $J = 7.2$  Hz, 3H).  $^{13}\text{C NMR}$  (150 MHz,  $\text{CDCl}_3$ )  $\delta$  163.6, 159.3, 157.1, 141.1, 131.0, 129.1, 120.8, 115.5, 114.1, 113.5, 113.1, 60.6, 55.4, 14.3. **HRMS** (ESI)  $m/z$  calcd. for  $\text{C}_{14}\text{H}_{14}\text{NaO}_3^+$   $[\text{M}+\text{Na}]^+$  : 253.0841; Found:253.0841.

---

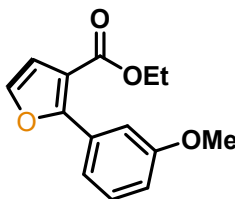

**Ethyl 2-(3-methoxyphenyl)furan-3-carboxylate (4t).** Yellow solid. mp: 50-52°C.  $^1\text{H NMR}$  (600 MHz,  $\text{CDCl}_3$ )  $\delta$  7.63 (s, 1H), 7.59 (d,  $J = 7.2$  Hz, 1H), 7.42 (d,  $J = 1.8$  Hz, 1H), 7.35 (t,  $J = 8.4$  Hz, 1H), 6.96 (dd,  $J = 2.4$  Hz, 8.4 Hz, 1H), 6.85 (d,  $J = 1.8$  Hz, 1H), 4.31 (q,  $J = 7.2$  Hz, 2H), 3.86 (s, 3H), 1.34 (t,  $J = 7.2$  Hz, 3H).  $^{13}\text{C NMR}$  (150 MHz,  $\text{CDCl}_3$ )  $\delta$  163.6, 159.3, 157.1, 141.1, 131.0, 129.1, 120.8, 115.5, 114.1, 113.5, 113.1, 60.6, 55.4, 14.3. **IR** (Film): 2925, 1651, 1476, 1443, 1093, 885, 725, 691  $\text{cm}^{-1}$ . **HRMS** (ESI)  $m/z$  calcd. for  $\text{C}_{14}\text{H}_{14}\text{NaO}_4^+$   $[\text{M}+\text{Na}]^+$  : 269.0784; Found: 269.0788.

---

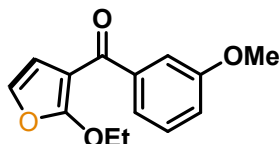

**(2-ethoxyfuran-3-yl)(3-methoxyphenyl)methanone (4t').** Yellow solid. mp: 56-58°C.  $^1\text{H NMR}$  (600 MHz,  $\text{CDCl}_3$ )  $\delta$  7.36-7.28 (m, 3H), 7.05 (qd,  $J = 2.4$  Hz, 7.8 Hz, 1H), 6.89 (d,  $J = 2.4$  Hz, 1H), 6.69 (d,  $J = 2.4$  Hz, 1H), 3.39 (q,  $J = 7.2$  Hz, 2H), 3.84 (s, 3H), 1.35 (t,  $J = 7.2$  Hz, 3H).  $^{13}\text{C NMR}$  (150 MHz,



CDCl<sub>3</sub>)  $\delta$  163.6, 159.3, 157.1, 141.1, 131.0, 129.1, 120.8, 115.5, 114.1, 113.5, 113.1, 60.6, 55.4, 14.3.

**HRMS** (ESI)  $m/z$  calcd. for C<sub>14</sub>H<sub>14</sub>NaO<sub>4</sub><sup>+</sup> [M+Na]<sup>+</sup> : 269.0784; Found: 269.0788.

---

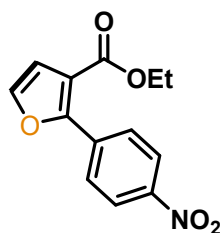

**Ethyl 2-(4-nitrophenyl)furan-3-carboxylate (4u)**. White solid, mp: 104-105°C. **<sup>1</sup>H NMR** (600 MHz, CDCl<sub>3</sub>)  $\delta$  8.26 (q,  $J$  = 9.0 Hz, 4H), 7.52 (d,  $J$  = 1.8 Hz, 1H), 6.89 (d,  $J$  = 2.4 Hz, 1H), 6.91 (d,  $J$  = 1.8 Hz, 1H), 4.34 (q,  $J$  = 7.2 Hz, 2H), 1.36 (t,  $J$  = 7.2 Hz, 3H). **<sup>13</sup>C NMR** (150 MHz, CDCl<sub>3</sub>)  $\delta$  163.1, 154.4, 147.7, 142.6, 135.5, 128.9, 123.4, 116.7, 113.8, 61.0, 14.2. **IR** (Film): 2983, 1708, 1430, 1225, 1100, 1031 cm<sup>-1</sup>. **HRMS** (ESI)  $m/z$  calcd. for C<sub>13</sub>H<sub>11</sub>NNaO<sub>5</sub><sup>+</sup> [M+Na]<sup>+</sup>: 284.0533; Found: 284.0539.

---

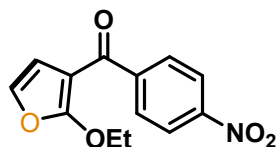

**(2-ethoxyfuran-3-yl)(4-nitrophenyl)methanone (4u')**. White solid, mp: 96-97°C. **<sup>1</sup>H NMR** (600 MHz, CDCl<sub>3</sub>)  $\delta$  8.27 (d,  $J$  = 9.0 Hz, 2H), 7.85 (d,  $J$  = 9.0 Hz, 2H), 6.93 (d,  $J$  = 2.4 Hz, 1H), 6.71 (d,  $J$  = 2.4 Hz, 1H), 4.39 (q,  $J$  = 7.2 Hz, 2H), 1.31 (t,  $J$  = 7.2 Hz, 3H). **<sup>13</sup>C NMR** (150 MHz, CDCl<sub>3</sub>)  $\delta$  186.8, 162.4, 149.3, 144.7, 133.4, 129.4, 123.2, 111.8, 99.9, 67.8, 14.8. **HRMS** (ESI)  $m/z$  calcd. for C<sub>13</sub>H<sub>11</sub>NNaO<sub>5</sub><sup>+</sup> [M+Na]<sup>+</sup>: 284.0533; Found: 284.0539.

---

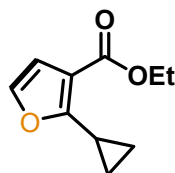

**Ethyl 2-cyclopropylfuran-3-carboxylate (4v)**. Colorless oil. **<sup>1</sup>H NMR** (600 MHz, CDCl<sub>3</sub>)  $\delta$  7.07 (d,  $J$  = 1.8 Hz, 1H), 6.60 (d,  $J$  = 1.8 Hz, 1H), 4.29 (q,  $J$  = 7.2 Hz, 2H), 2.72-2.80 (m, 1H), 1.34 (t,  $J$  = 7.2 Hz, 3H), 0.98-1.06 (m, 4H). **<sup>13</sup>C NMR** (150 MHz, CDCl<sub>3</sub>)  $\delta$  163.38, 162.12, 138.04, 112.05, 109.94, 59.01, 13.38, 8.17, 7.29. **IR** (Film): 3112, 2958, 1651, 1485, 1443, 1263, 1237, 887, 779, 691 cm<sup>-1</sup>. **HRMS** (ESI)  $m/z$  calcd. for C<sub>10</sub>H<sub>12</sub>NaO<sub>3</sub><sup>+</sup> [M+Na]<sup>+</sup> : 203.0684; Found: 203.0685.

---

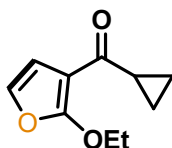

**Cyclopropyl(2-ethoxyfuran-3-yl)methanone (4v')**. Colorless oil  $^1\text{H NMR}$  (600 MHz,  $\text{CDCl}_3$ )  $\delta$  6.85 (d,  $J = 2.4$  Hz, 1H), 6.69 (d,  $J = 2.4$  Hz, 1H), 4.48 (q,  $J = 7.2$  Hz, 2H), 2.67-2.60 (m, 1H), 1.47 (t,  $J = 7.2$  Hz, 3H), 1.10-1.15 (m,  $J = 2$  Hz), 0.85-0.90 (m,  $J = 2$  Hz).  $^{13}\text{C NMR}$  (150 MHz,  $\text{CDCl}_3$ )  $\delta$  194.1, 162.0, 132.7, 110.8, 102.4, 67.5, 18.0, 15.0, 10.5. **HRMS** (ESI)  $m/z$  calcd. for  $\text{C}_{10}\text{H}_{12}\text{NaO}_3^+$   $[\text{M}+\text{Na}]^+$ : 203.0684; Found: 203.0685.

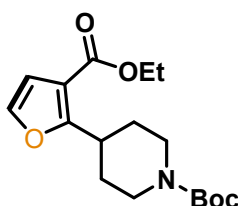

**Tert-butyl 4-(3-(ethoxycarbonyl)furan-2-yl)piperidine-1-carboxylate (4w)**. White solid, mp: 124-125°C.  $^1\text{H NMR}$  (600 MHz,  $\text{CDCl}_3$ )  $\delta$  7.21 (d,  $J = 1.8$  Hz, 1H), 6.59 (d,  $J = 1.8$  Hz, 1H), 4.24 (q,  $J = 7.2$  Hz, 2H), 4.15 (s, 1H), 3.56 (tt,  $J = 3.6$  Hz, 11.4 Hz, 1H), 2.79 (s, 2H), 1.67-1.82 (m, 4H), 1.43 (s, 9H), 1.30 (t,  $J = 7.2$  Hz, 3H).  $^{13}\text{C NMR}$  (150 MHz,  $\text{CDCl}_3$ )  $\delta$  164.5, 163.8, 154.7, 140.5, 112.4, 110.6, 79.4, 60.1, 44.1, 35.1, 29.7, 28.4, 14.3. **IR** (Film): 3028, 2925, 1668, 1500, 1478, 1045, 935, 808, 745, 682  $\text{cm}^{-1}$ . **HRMS** (ESI)  $m/z$  calcd. for  $\text{C}_{17}\text{H}_{25}\text{NNaO}_5^+$   $[\text{M}+\text{Na}]^+$ : 346.1628; Found: 346.1635.

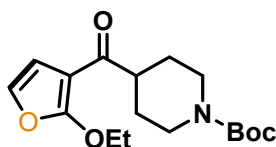

**Tert-butyl 4-(2-ethoxyfuran-3-carbonyl)piperidine-1-carboxylate (4w')**. White solid, mp: 117-118°C.  $^1\text{H NMR}$  (600 MHz,  $\text{CDCl}_3$ )  $\delta$  6.84 (d,  $J = 2.4$  Hz, 1H), 6.68 (d,  $J = 2.4$  Hz, 2H), 4.47 (q,  $J = 7.2$  Hz, 2H), 4.13 (s, 1H), 3.09 (tt,  $J = 3.6$  Hz, 11.4 Hz, 1H), 2.80 (s, 2H), 1.76 (s, 2H), 1.56-1.67 (m, 2H), 1.43 (s, 9H), 1.47 (t,  $J = 7.2$  Hz, 3H), 1.45 (s, 9H).  $^{13}\text{C NMR}$  (150 MHz,  $\text{CDCl}_3$ )  $\delta$  195.7, 161.2, 154.8, 133.1, 111.0, 100.4, 79.4, 67.4, 45.6, 43.2, 28.5, 15.0. **HRMS** (ESI)  $m/z$  calcd. for  $\text{C}_{17}\text{H}_{25}\text{NNaO}_5^+$   $[\text{M}+\text{Na}]^+$ : 346.1628; Found: 346.1635.

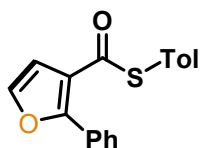

**S-(4-tolyl) 2-phenylfuran-3-carbothioate (4x).** Brown oil.  $^1\text{H NMR}$  (600 MHz,  $\text{CDCl}_3$ )  $\delta$  7.84 (d,  $J = 7.8$  Hz, 2H), 7.57 (t,  $J = 7.2$  Hz, 1H), 7.47 (t,  $J = 7.2$  Hz, 2H), 7.39 (d,  $J = 1.8$  Hz, 1H), 7.39 (d,  $J = 7.8$  Hz, 2H), 7.17 (d,  $J = 7.8$  Hz, 2H), 6.73 (d,  $J = 1.8$  Hz, 3H), 2.36 (s, 3H).  $^{13}\text{C NMR}$  (150 MHz,  $\text{CDCl}_3$ )  $\delta$  189.6, 154.0, 143.7, 138.9, 138.4, 133.0, 132.5, 130.0, 129.2, 128.4, 126.9, 124.0, 112.7, 21.3. **IR** (Film): 3031, 2989, 1754, 1672, 1377, 1241, 1055  $\text{cm}^{-1}$ . **HRMS** (ESI)  $m/z$  calcd. for  $\text{C}_{11}\text{H}_7\text{NaO}_2\text{S}^+$   $[\text{M}+\text{Na}]^+$ : 226.0064; Found: 226.0065.

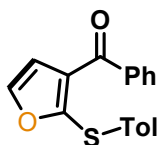

**Phenyl(2-(p-tolylthio)furan-3-yl)methanone (4x').** Brown oil.  $^1\text{H NMR}$  (600 MHz,  $\text{CDCl}_3$ )  $\delta$  7.85-7.94 (m, 2H), 7.41 (d,  $J = 1.8$  Hz, 1H), 7.27-7.34 (m, 5H), 7.18 (d,  $J = 7.2$  Hz, 2H), 6.95 (d,  $J = 1.8$  Hz, 1H), 2.32 (s, 3H).  $^{13}\text{C NMR}$  (150 MHz,  $\text{CDCl}_3$ )  $\delta$  185.0, 155.4, 141.5, 139.9, 135.0, 130.1, 129.8, 129.4, 128.2, 1234.0, 120.1, 111.9, 89.70, 21.4. **HRMS** (ESI)  $m/z$  calcd. for  $\text{C}_{11}\text{H}_7\text{NaO}_2\text{S}^+$   $[\text{M}+\text{Na}]^+$ : 226.0064; Found: 226.0065.

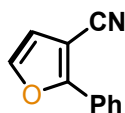

**2-phenylfuran-3-carbonitrile (4y).** Yellow solid, mp: 68-69°C.  $^1\text{H NMR}$  (600 MHz,  $\text{CDCl}_3$ )  $\delta$  7.99 (d,  $J = 7.2$  Hz, 2H), 7.41-7.51 (m, 3H), 7.47 (d,  $J = 1.8$  Hz, 1H), 6.68 (d,  $J = 1.8$  Hz, 1H), 2.53 (s, 3H).  $^{13}\text{C NMR}$  (150 MHz,  $\text{CDCl}_3$ )  $\delta$  158.9, 141.1, 129.1, 128.0, 127.0, 124.4, 113.9, 112.3, 90.6. **IR** (Film): 3196, 3033, 1642, 1599, 1220, 757, 686  $\text{cm}^{-1}$ . **HRMS** (ESI)  $m/z$  calcd. for  $\text{C}_{11}\text{H}_7\text{NNaO}^+$   $[\text{M}+\text{Na}]^+$ : 192.0424; Found: 192.0425.

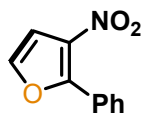

**3-nitro-2-phenylfuran (4z).** Brown solid, mp: 120-121°C,  $^1\text{H NMR}$  (600 MHz,  $\text{CDCl}_3$ )  $\delta$  7.87-7.93 (m, 2H), 7.47-7.53 (m, 3H), 7.43 (d,  $J = 1.8$  Hz, 1H), 7.07 (d,  $J = 1.8$  Hz, 1H).  $^{13}\text{C NMR}$  (150 MHz,  $\text{CDCl}_3$ )

$\delta$  153.1, 141.3, 130.9, 129.0, 128.4, 127.5, 109.1. **HRMS** (ESI)  $m/z$  calcd. for  $C_{10}H_7NNaO_3^+$   $[M+Na]^+$  : 212.0336; Found: 212.0334.

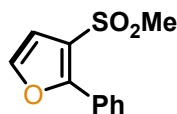

**3-(methylsulfonyl)-2-phenylfuran (4aa).** Yellow solid, mp: 112-113°C.  **$^1H$  NMR** (600 MHz,  $CDCl_3$ )  $\delta$  7.98 (d,  $J$  = 8.4 Hz, 2H), 7.55-7.52 (m, 4H), 6.90 (d,  $J$  = 2.4 Hz, 1H), 3.01 (s, 3H).  **$^{13}C$  NMR** (150 MHz,  $CDCl_3$ )  $\delta$  154.70, 141.5, 130.3, 128.8, 128.3, 123.4, 112.5, 43.9. **IR** (Film): 3071, 2998, 2942, 1582, 1478, 1408, 1160  $cm^{-1}$ . **HRMS** (ESI)  $m/z$  calcd. for  $C_{11}H_{10}NaO_3S^+$   $[M+Na]^+$  : 245.0248; Found: 245.0257.

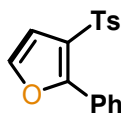

**2-phenyl-3-tosylfuran (4ab).** White solid, 120-121°C.  **$^1H$  NMR** (600 MHz,  $CDCl_3$ )  $\delta$  7.84-7.88 (m, 2H), 7.67 (d,  $J$  = 8.4 Hz, 2H), 7.43 (d,  $J$  = 2.4 Hz, 1H), 7.40-7.44 (m, 3H), 7.19 (d,  $J$  = 7.8 Hz, 2H), 6.84 (d,  $J$  = 2.4 Hz, 1H), 2.53 (s, 3H).  **$^{13}C$  NMR** (150 MHz,  $CDCl_3$ )  $\delta$  155.1, 144.2, 141.4, 139.0, 130.0, 129.6, 128.7, 128.3, 127.1, 124.2, 112.7, 21.6. **IR** (Film): 2998, 1428, 1235, 1100, 1031  $cm^{-1}$ . **HRMS** (ESI)  $m/z$  calcd. for  $C_{17}H_{14}NaO_3S^+$   $[M+Na]^+$  : 321.0556; Found: 321.0560.

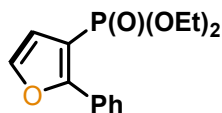

**Diethyl (2-phenylfuran-3-yl)phosphonate (4ac).** Yellow solid, mp: 97-98°C,  **$^1H$  NMR** (600 MHz,  $CDCl_3$ )  $\delta$  7.97 (d,  $J$  = 7.2 Hz, 2H), 7.50 (t,  $J$  = 1.8 Hz, 1H), 7.43 (t,  $J$  = 7.2 Hz, 2H), 7.38 (t,  $J$  = 7.2 Hz, 1H), 4.01-4.16 (m, 4H), 1.24 (t,  $J$  = 7.2 Hz, 6H).  **$^{13}C$  NMR** (150 MHz,  $CDCl_3$ )  $\delta$  158.4(d,  $J$  = 25.5 Hz), 141.5(d,  $J$  = 30.0 Hz), 129.6, 129.2, 128.4, 127.5, 115.6(d,  $J$  = 10.5 Hz), 107.4(d,  $J$  = 214.5 Hz), 62.2(d,  $J$  = 4.5 Hz), 16.2(d,  $J$  = 6.0 Hz). **HRMS** (ESI)  $m/z$  calcd. for  $C_{14}H_{17}NaO_4P^+$   $[M+Na]^+$  : 303.0757; Found: 303.0772.

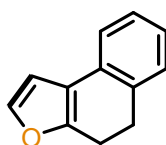

**4,5-dihydronaphtho[2,1-b]furan (4ad)**. White solid, mp: 44-45°C.  $^1\text{H NMR}$  (600 MHz,  $\text{CDCl}_3$ )  $\delta$  7.36 (d,  $J = 1.8$  Hz, 1H), 7.30 (d,  $J = 7.2$  Hz, 1H), 7.22 (t,  $J = 7.2$  Hz, 1H), 7.19 (d,  $J = 7.2$  Hz, 1H), 7.11 (t,  $J = 7.2$  Hz, 1H), 6.67 (d,  $J = 1.8$  Hz, 1H), 3.10 (t,  $J = 7.8$  Hz, 2H), 2.92 (t,  $J = 7.8$  Hz, 2H).  $^{13}\text{C NMR}$  (150 MHz,  $\text{CDCl}_3$ )  $\delta$  151.7, 140.8, 132.1, 130.2, 127.0, 125.7, 124.7, 121.1, 117.4, 105.2, 28.4, 20.9. **IR** (Film): 2918, 1678, 1447, 1376, 1241  $\text{cm}^{-1}$ . **HRMS** (ESI)  $m/z$  calcd. For  $\text{C}_{12}\text{H}_{10}\text{NaO}^+$   $[\text{M}+\text{Na}]^+$ : 193.0632; Found: 193.0633.

---

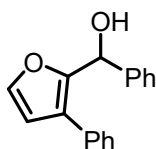

**phenyl(3-phenylfuran-2-yl)methanol (5)**. Colorless oil.  $^1\text{H NMR}$  (500 MHz,  $\text{CDCl}_3$ )  $\delta$  7.67-7.62 (m, 2H), 7.45-7.38 (m, 5H), 7.38-7.31 (m, 3H), 7.30-7.26 (m, 1H), 6.37 (d,  $J = 2.0$  Hz, 1H), 6.04 (d,  $J = 2.0$  Hz, 1H), 2.29-2.26 (m, 1H).  $^{13}\text{C NMR}$  (150 MHz,  $\text{CDCl}_3$ )  $\delta$  150.3, 142.9, 141.7, 130.6, 128.7, 128.5, 127.9, 127.6, 126.5, 126.3, 123.5, 111.4, 68.5. **IR** (Film): 3421, 3060, 3030, 1621, 1486, 769, 695  $\text{cm}^{-1}$ .

---

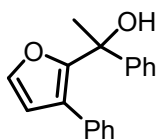

**1-phenyl-1-(3-phenylfuran-2-yl)ethan-1-ol (6)**. Colorless oil.  $^1\text{H NMR}$  (500 MHz,  $\text{CDCl}_3$ )  $\delta$  7.46-7.35 (m, 5H), 7.30-7.24 (m, 2H), 7.23-7.17 (m, 4H), 6.54 (d,  $J = 2.0$  Hz, 1H), 2.37 (s, 1H), 1.83 (s, 3H).  $^{13}\text{C NMR}$  (150 MHz,  $\text{CDCl}_3$ )  $\delta$  149.5, 148.0, 140.7, 131.5, 128.1, 128.0, 127.8, 126.3, 125.4, 112.4, 73.0, 32.7. **IR** (Film): 3447, 3058, 2979, 2359, 1484, 769, 698  $\text{cm}^{-1}$ .

---

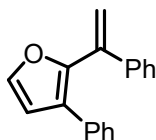

**3-phenyl-2-(1-phenylvinyl)furan (7)**. Colorless oil.  $^1\text{H NMR}$  (500 MHz,  $\text{CDCl}_3$ )  $\delta$  7.64-7.58 (m, 2H), 7.47-7.41 (m, 3H), 7.29-7.19 (m, 5H), 7.18-7.12 (m, 1H), 6.38 (d,  $J = 1.5$  Hz, 1H), 5.74 (d,  $J = 1.5$  Hz, 1H), 5.39 (d,  $J = 1.5$  Hz, 1H).  $^{13}\text{C NMR}$  (150 MHz,  $\text{CDCl}_3$ )  $\delta$  149.6, 141.8, 141.1, 139.6, 130.9, 128.3, 128.2, 127.9, 127.2, 126.8, 125.8, 121.7, 116.1, 114.7. **IR** (Film): 3056, 2359, 2342, 1484, 1059, 769, 692  $\text{cm}^{-1}$ .

---

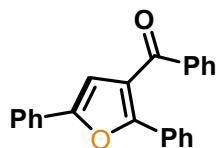

**(2,5-diphenylfuran-3-yl)(phenyl)methanone (10).** Yellow oil.  $^1\text{H NMR}$  (600 MHz,  $\text{CDCl}_3$ )  $\delta$  7.90 (d,  $J = 7.8$  Hz, 2H), 7.82-7.77(m, 4H), 7.55-7.53 (m, 1H), 7.45-7.40 (m, 4H), 7.36-7.33 (m, 4H), 6.94 (s, 1H).  $^{13}\text{C NMR}$  (150 MHz,  $\text{CDCl}_3$ )  $\delta$  191.7, 154.9, 152.4, 138.0, 132.9, 129.7, 129.6, 129.0, 128.8, 128.4, 128.3, 128.1, 127.4, 124.0, 122.8, 108.7. **IR** (Film): 2958, 1650, 1376, 1236, 889, 728, 691  $\text{cm}^{-1}$ . **HRMS** (ESI)  $m/z$  calcd. For  $\text{C}_{23}\text{H}_{16}\text{NaO}_2^+$   $[\text{M}+\text{Na}]^+$ : 347.1126; Found: 347.1125.

---

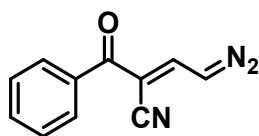

**(E)-2-benzoyl-4-diazobut-2-enenitrile (11).** Yellow oil.  $^1\text{H NMR}$  (600 MHz,  $\text{CDCl}_3$ )  $\delta$  8.19 (d,  $J = 10.8$  Hz, 1H), 7.85 (d,  $J = 7.8$  Hz, 2H), 7.56 (t,  $J = 7.8$  Hz, 1H), 7.47 (t,  $J = 7.8$  Hz, 2H), 5.77 (d,  $J = 10.8$  Hz, 1H).  $^{13}\text{C NMR}$  (150 MHz,  $\text{CDCl}_3$ )  $\delta$  186.0, 150.0, 136.8, 132.6, 128.6, 128.4, 116.7, 98.3, 58.4. **IR** (Film): 3077, 3053, 2923, 2360, 2196, 2158, 2106, 1645, 1541, 711, 688  $\text{cm}^{-1}$ .

---

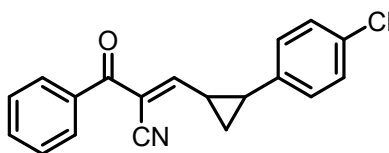

**(E)-2-benzoyl-3-(2-(4-chlorophenyl)cyclopropyl)acrylonitrile (13).** Yellow solid, mp: 64-65°C.  $^1\text{H NMR}$  (600 MHz,  $\text{CDCl}_3$ )  $\delta$  7.50 (t,  $J = 7.2$  Hz, 1H), 7.37 (d,  $J = 7.8$  Hz, 2H), 7.33-7.28 (m, 4H), 7.20 (d,  $J = 8.4$  Hz, 2H), 6.51(d,  $J = 10.8$  Hz, 1H), 3.02 (m, 1H), 2.66-2.60(m, 1H), 1.86-1.81(m, 1H), 1.64-1.61(m, 1H).  $^{13}\text{C NMR}$  (150 MHz,  $\text{CDCl}_3$ )  $\delta$  187.8, 166.0, 135.5, 134.7, 133.3, 133.0, 130.2, 129.0, 128.9, 128.4, 115.3, 115.0, 28.5, 24.0, 16.4. **HRMS** (ESI)  $m/z$  calcd. For  $\text{C}_{19}\text{H}_{14}\text{ClNNaO}^+$   $[\text{M}+\text{Na}]^+$ : 330.0662; Found: 330.0658.

---

V. X-ray single crystal data of 2a and 13.

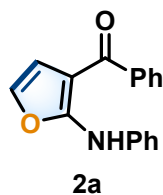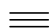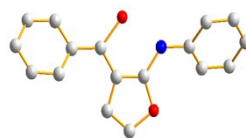

X-ray structure of **2a**

|                                   |                                                                                                |
|-----------------------------------|------------------------------------------------------------------------------------------------|
| Empirical formula                 | C <sub>17</sub> H <sub>13</sub> NO <sub>2</sub>                                                |
| Temperature                       | 273.15K                                                                                        |
| Wavelength                        | 0.71073Å                                                                                       |
| Unit cell dimensions              | a = 26.498(4) Å alpha = 90° .<br>b = 7.3940(10) Å beta = 90° .<br>c = 6.9959(10) Å gamma =90°. |
| Volume                            | 1370.7(3) Å <sup>3</sup>                                                                       |
| Z                                 | 4                                                                                              |
| Calculated density                | 1.276 g/cm <sup>3</sup>                                                                        |
| Absorption coefficient            | 0.084mm <sup>-1</sup>                                                                          |
| F(000)                            | 552.0                                                                                          |
| Crystal size                      | 0.2 × 0.2 × 0.2 mm <sup>3</sup>                                                                |
| Theta range for data collection   | 2.86° to 26.408°.                                                                              |
| Reflections collected / unique    | 7172                                                                                           |
| Data / restraints / parameters    | 1408/133/157                                                                                   |
| Goodness-of-fit on F <sup>2</sup> | 1.020                                                                                          |
| Final R indices [I>2sigma(I)]     | R1 = 0.0433, wR2 = 0.1111                                                                      |
| R indices (all data)              | R1 = 0.0722,wR2 = 0.1275                                                                       |

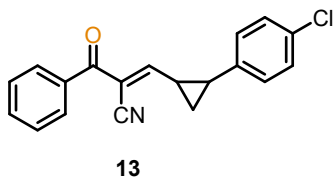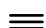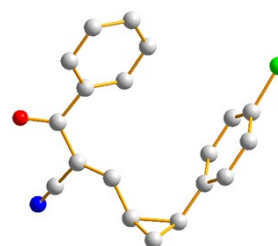

X-ray structure of **13**

|                   |                                     |
|-------------------|-------------------------------------|
| Empirical formula | C <sub>19</sub> NOClH <sub>14</sub> |
|-------------------|-------------------------------------|

|                                   |                                                                                                                     |
|-----------------------------------|---------------------------------------------------------------------------------------------------------------------|
| Temperature                       | 293(2)K                                                                                                             |
| Wavelength                        | 0.71069Å                                                                                                            |
| Unit cell dimensions              | a = 8.814(5) Å alpha = 90.000(5)° .<br>b = 11.755(5) Å beta = 106.222(5)° .<br>c = 15.281(5) Å gamma = 90.000(5)° . |
| Volume                            | 1520.2(12) Å <sup>3</sup>                                                                                           |
| Z                                 | 4                                                                                                                   |
| Calculated density                | 1.345g/cm <sup>3</sup>                                                                                              |
| Absorption coefficient            | 0.252mm <sup>-1</sup>                                                                                               |
| F(000)                            | 640.0                                                                                                               |
| Crystal size                      | 0.04 × 0.03 × 0.02mm <sup>3</sup>                                                                                   |
| Theta range for data collection   | 2.22° to 26.4°.                                                                                                     |
| Reflections collected / unique    | 8503                                                                                                                |
| Data / restraints / parameters    | 3106/0/255                                                                                                          |
| Goodness-of-fit on F <sup>2</sup> | 1.040                                                                                                               |
| Final R indices [I>2sigma(I)]     | R1 =0.0389, wR2 =0.1020                                                                                             |
| R indices (all data)              | R1 = 0.0527,wR2 =0.1108                                                                                             |



## VI. Copies of NMR spectra

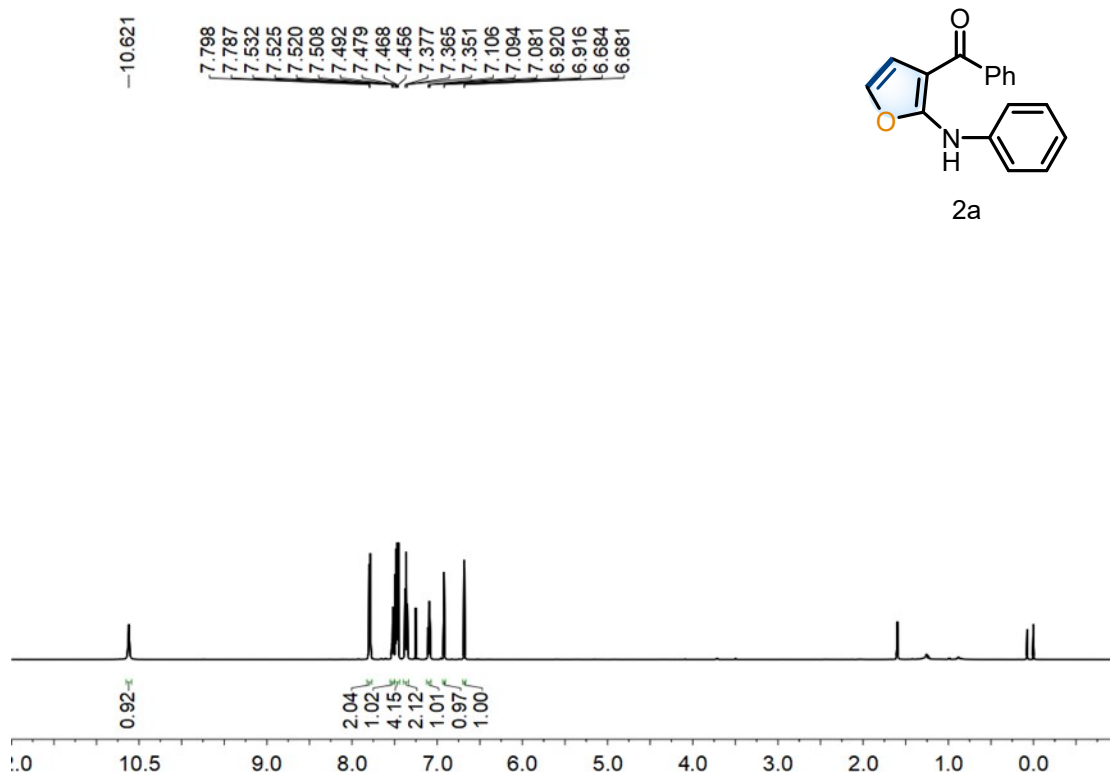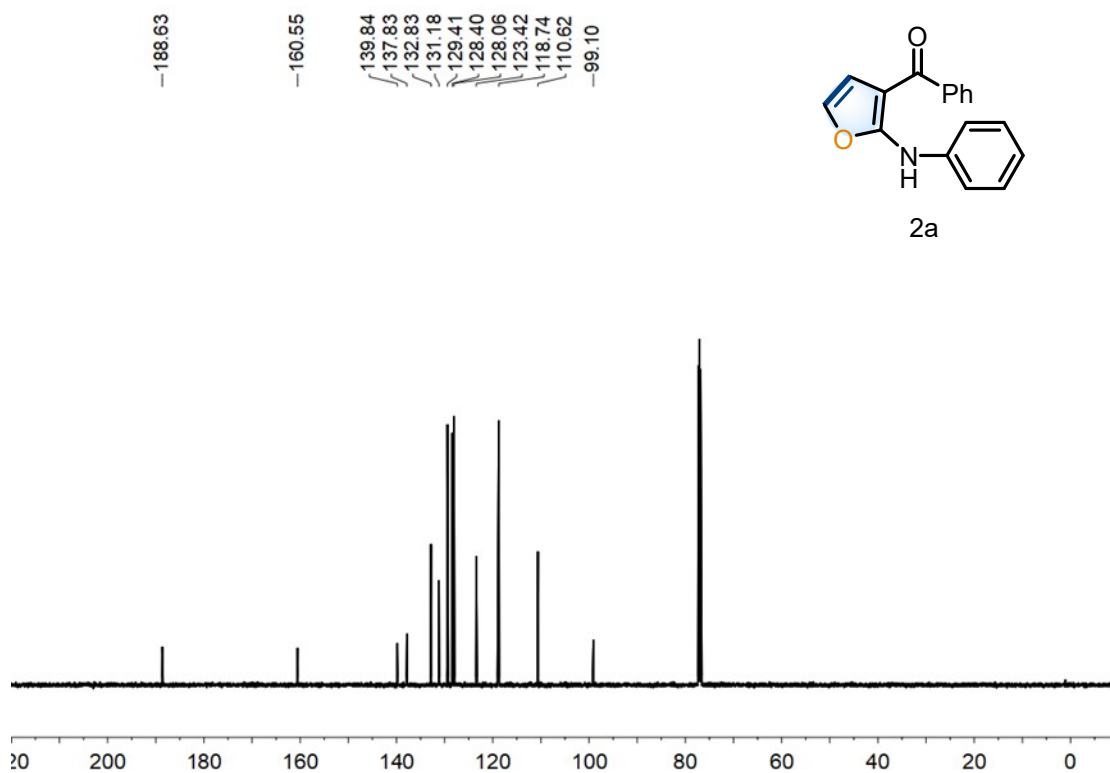

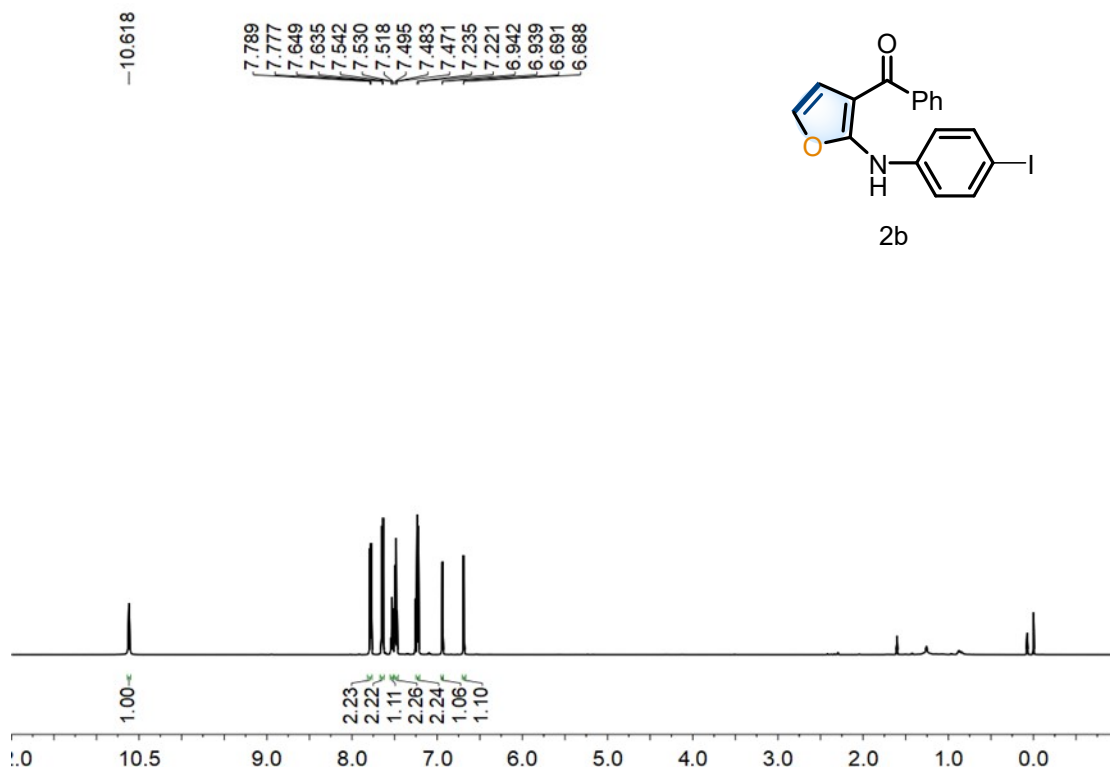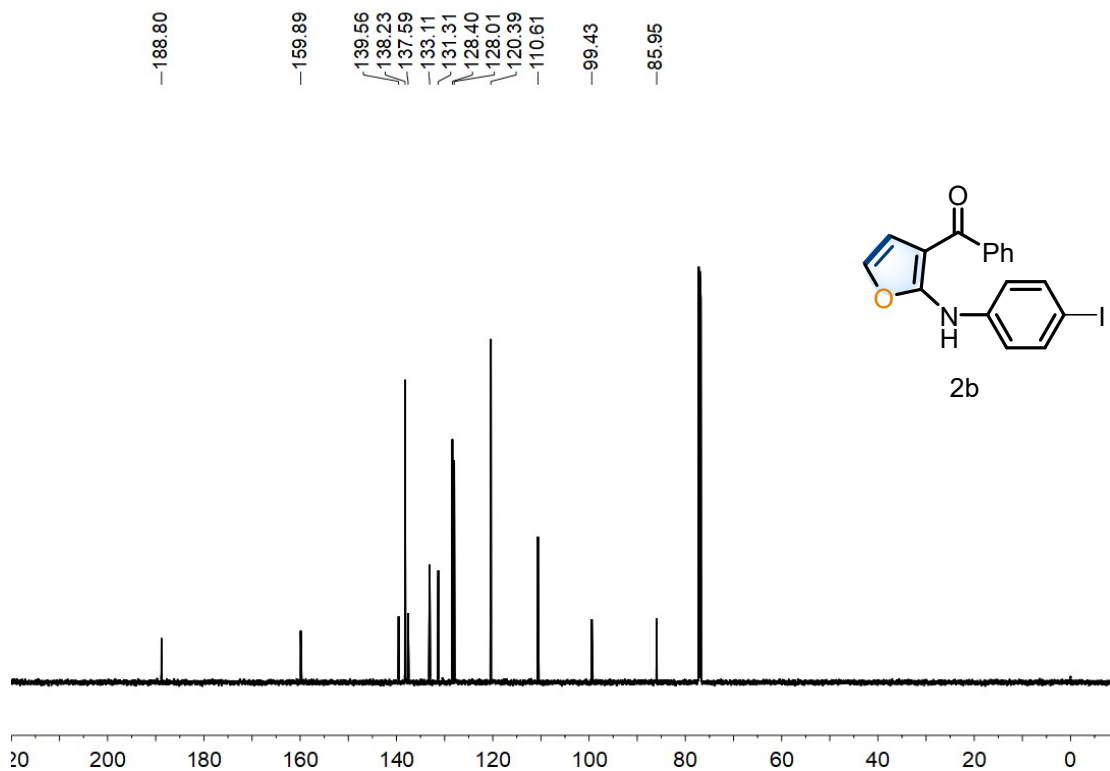

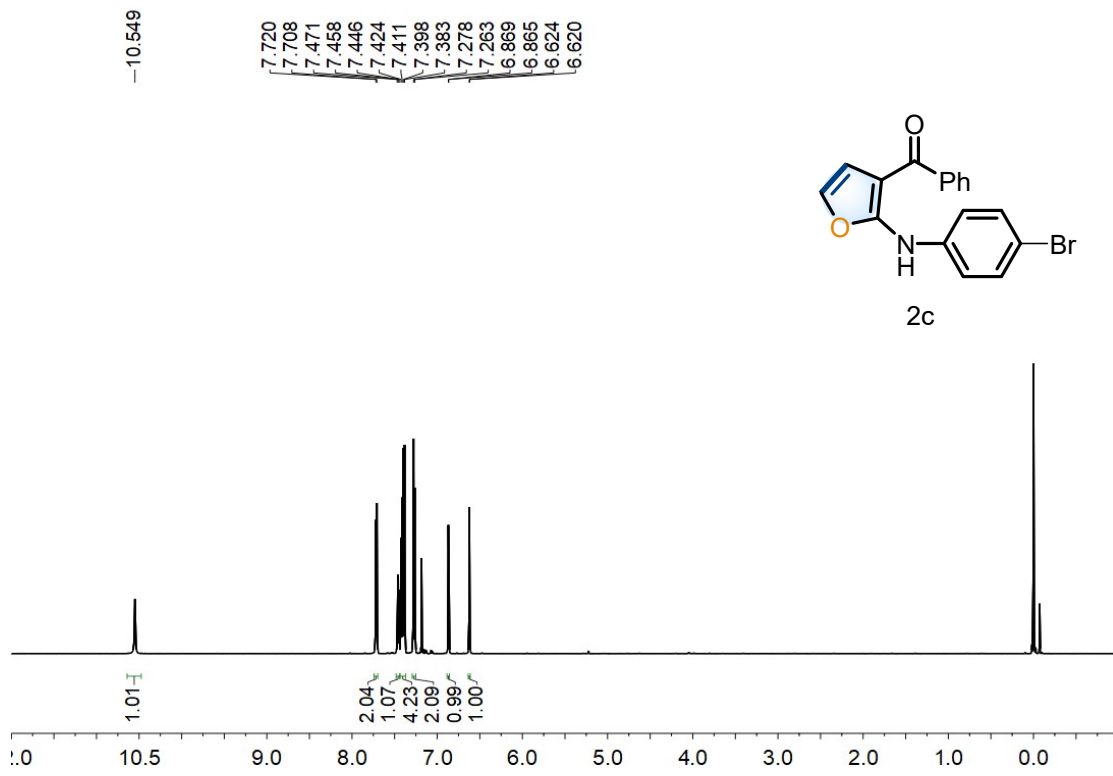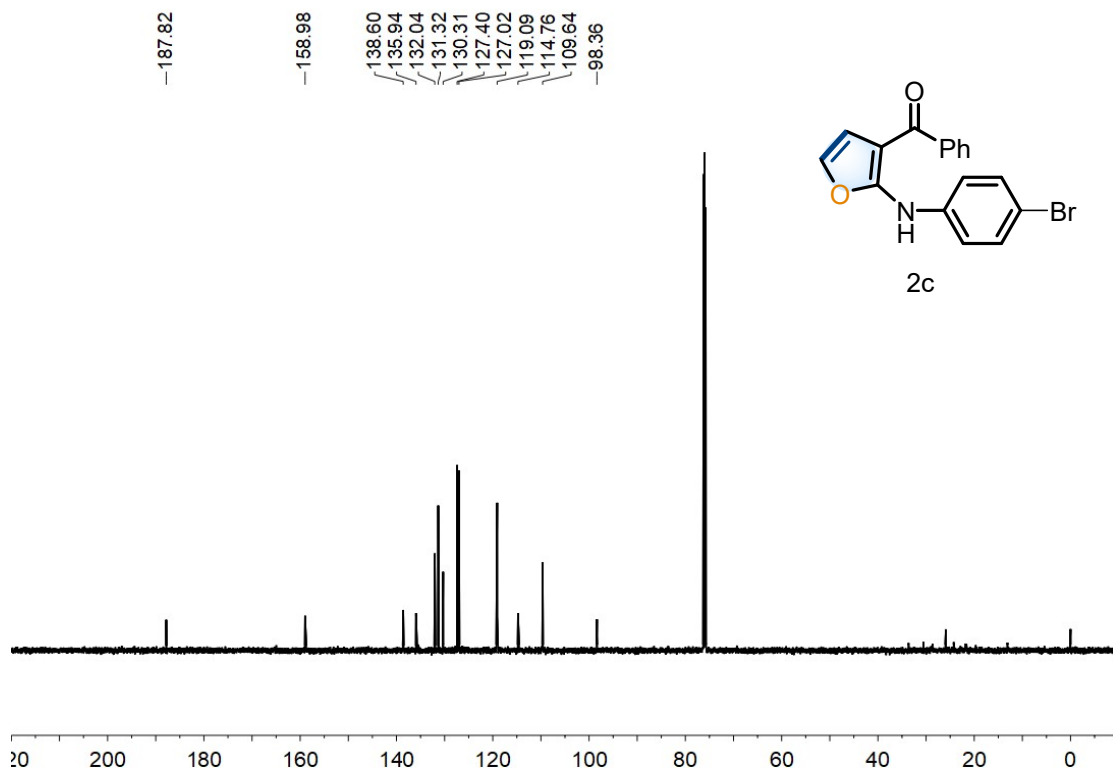

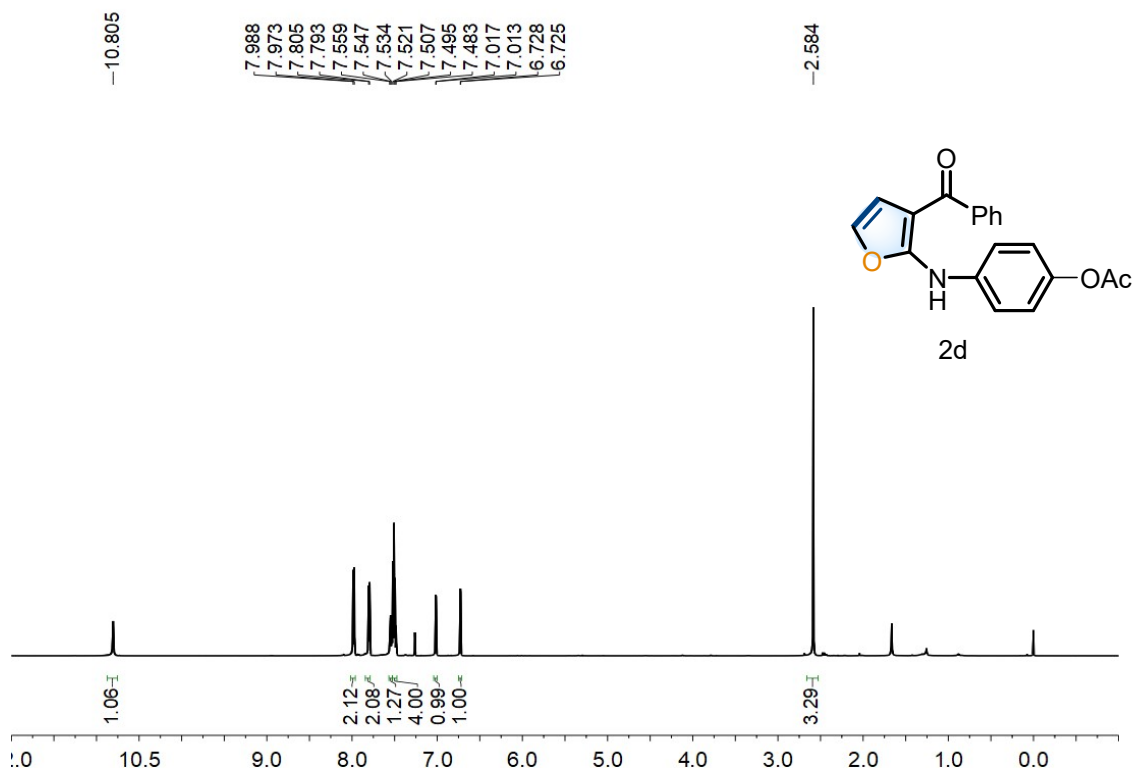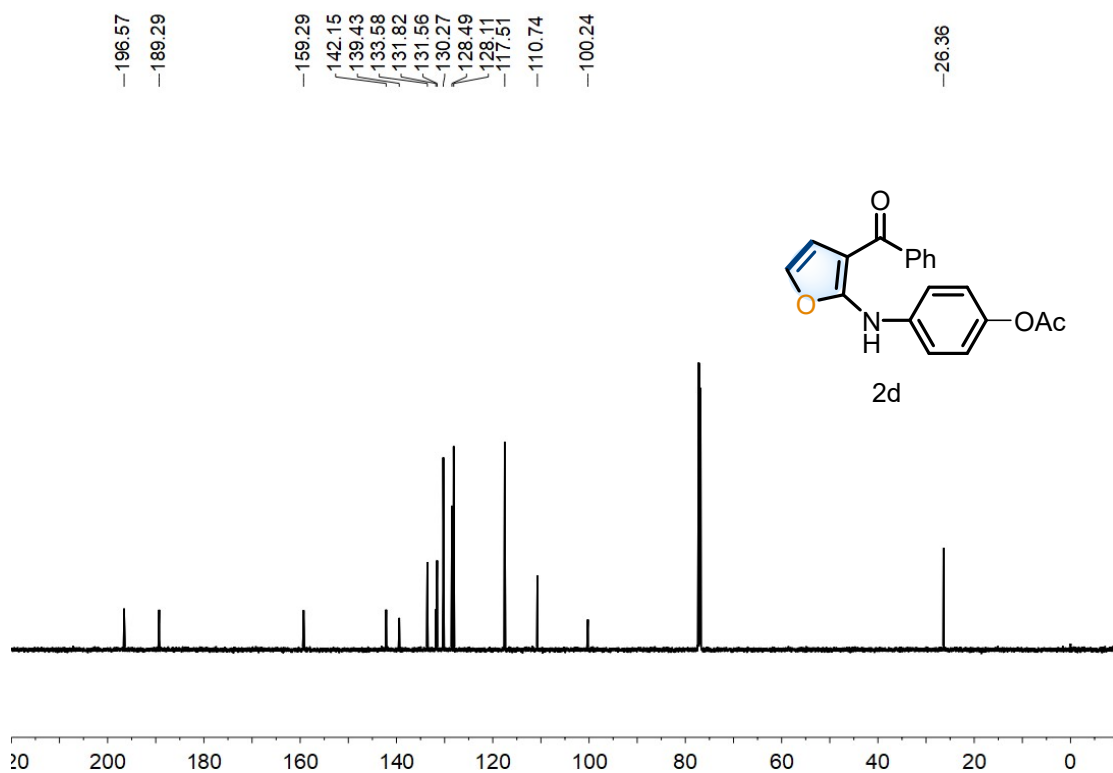

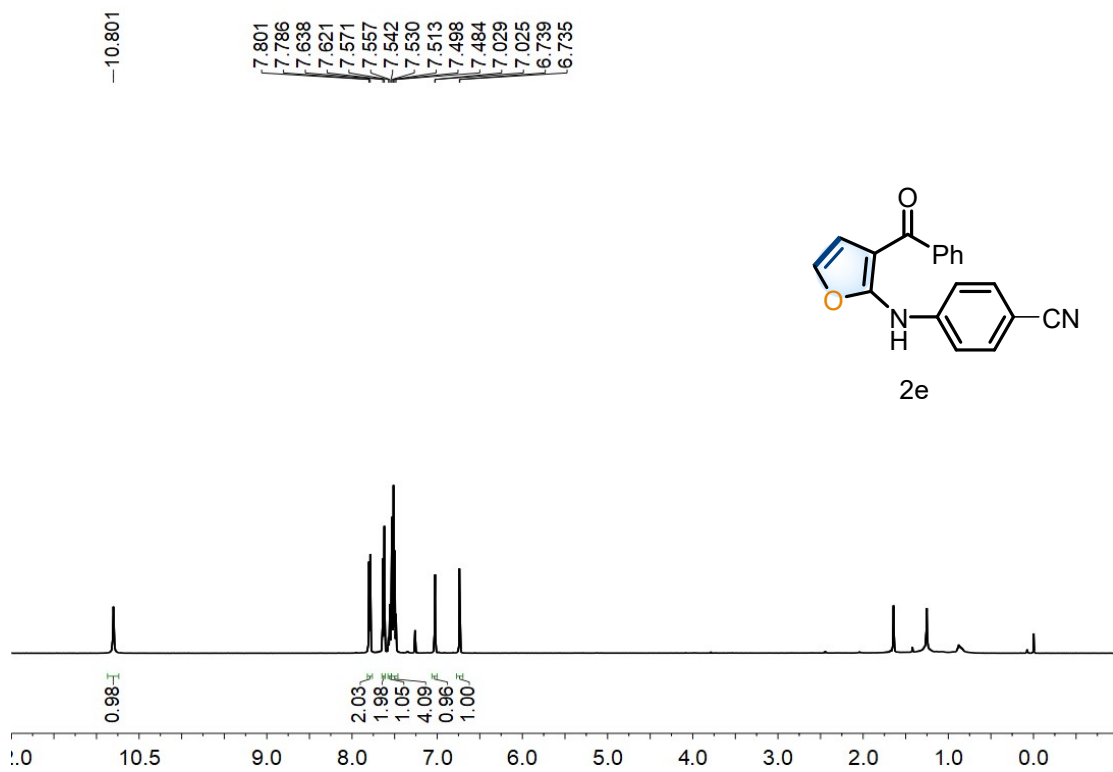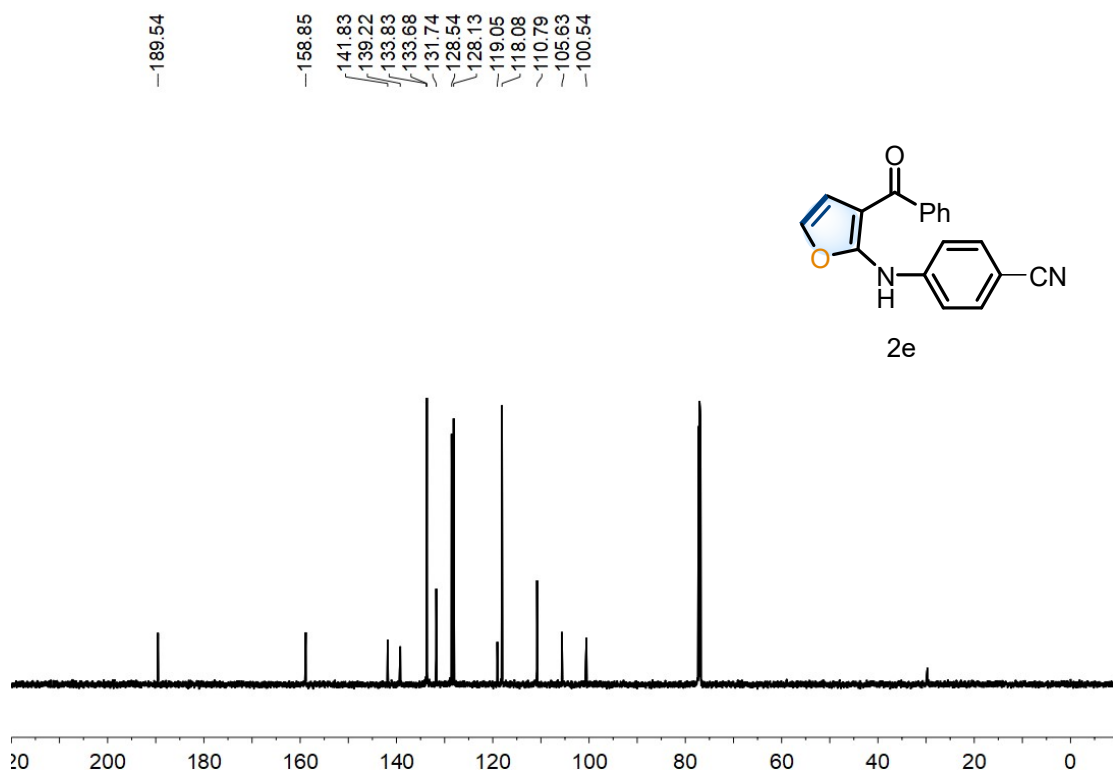

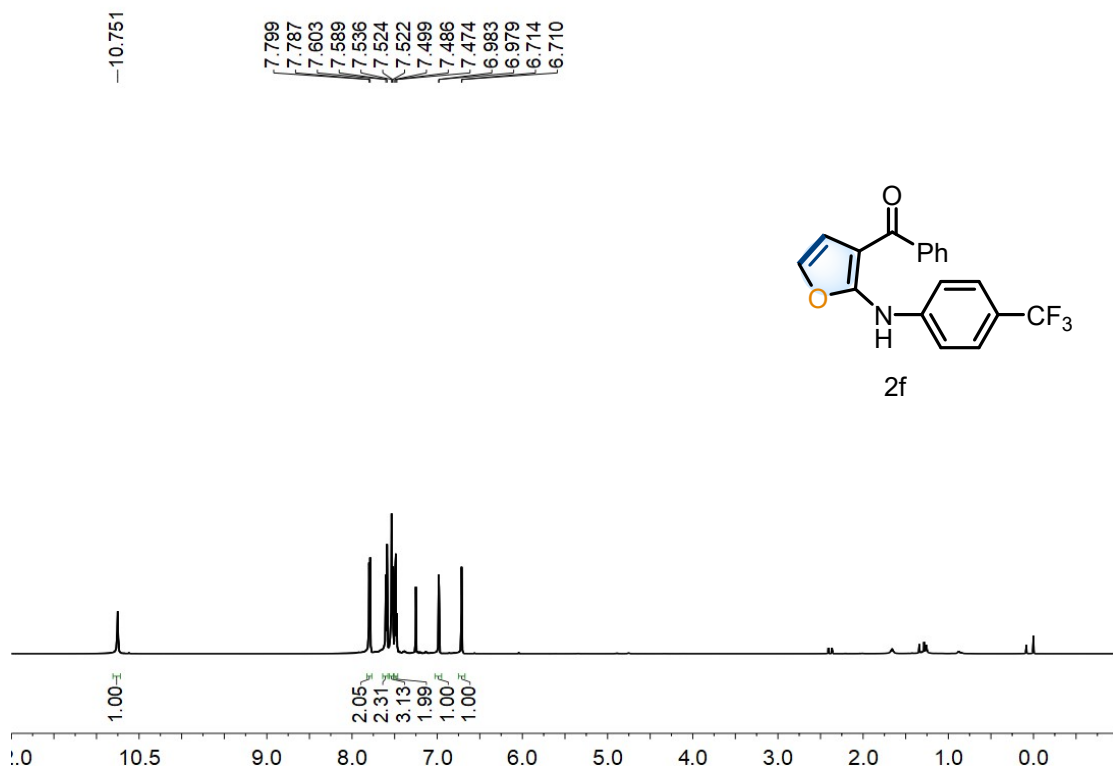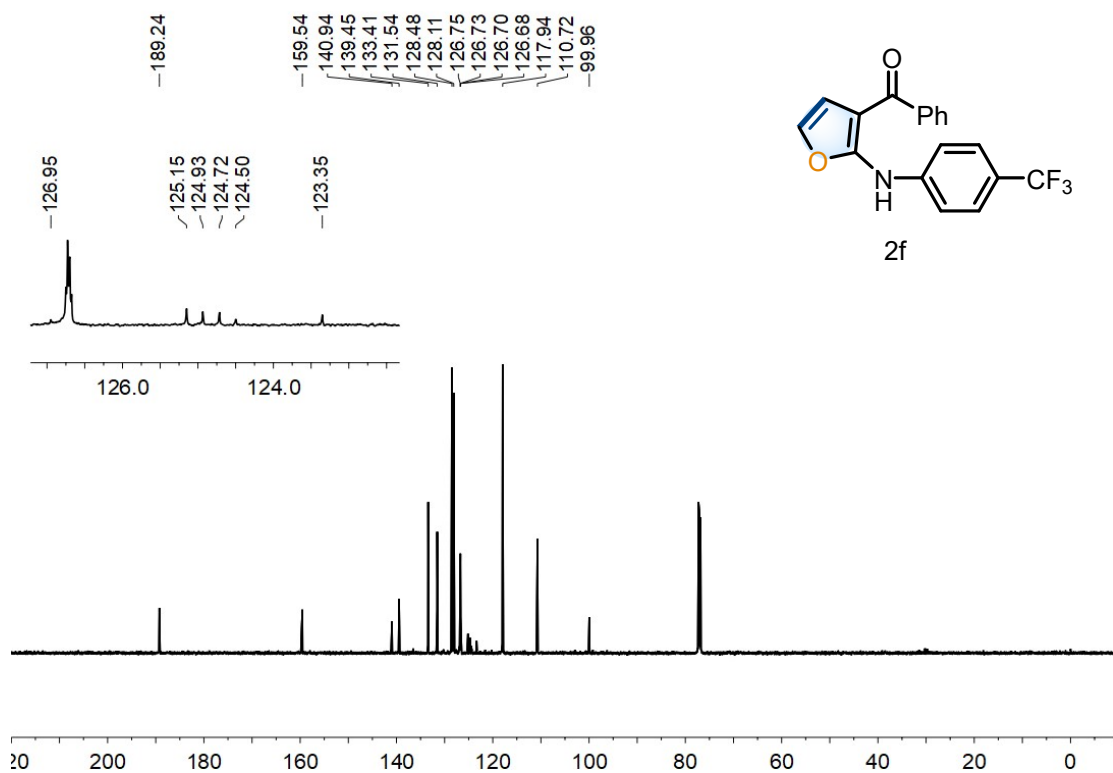

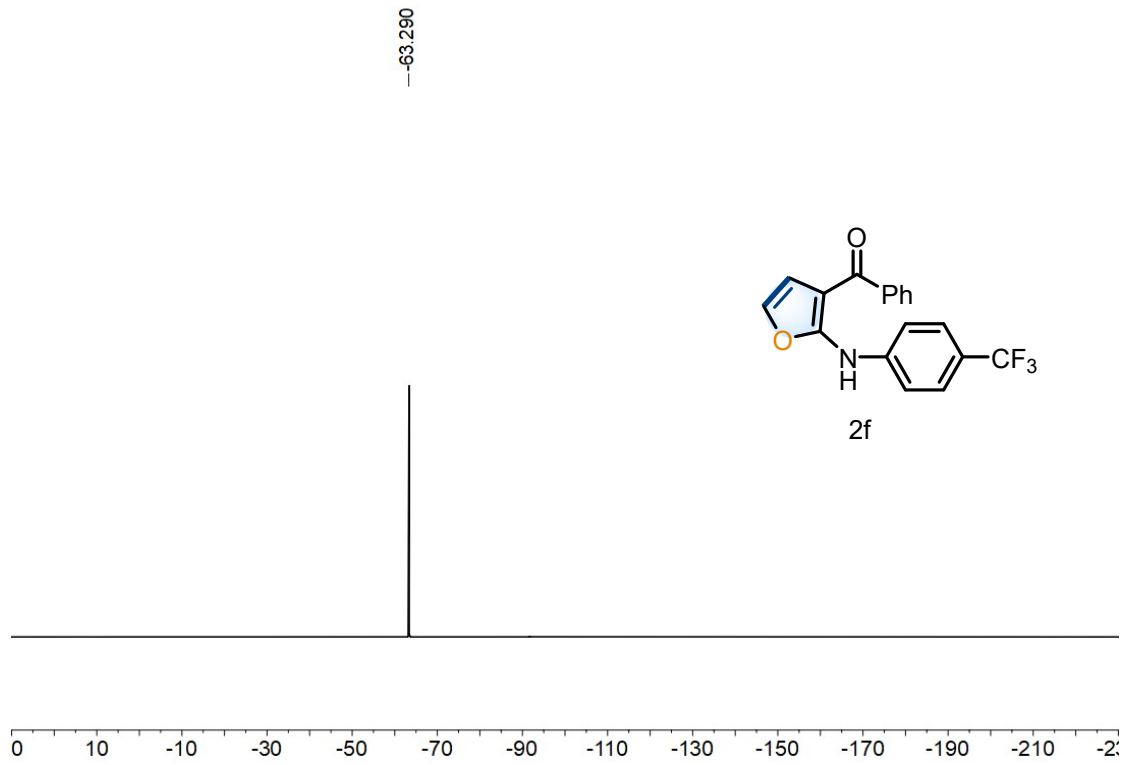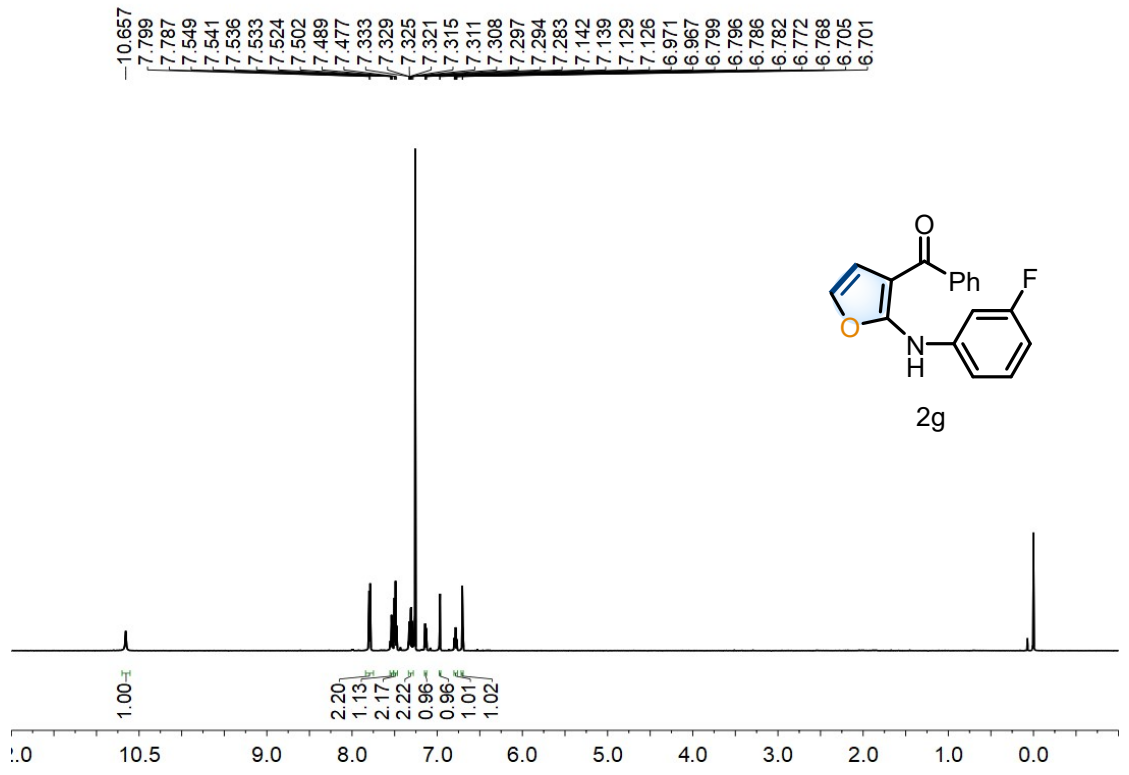

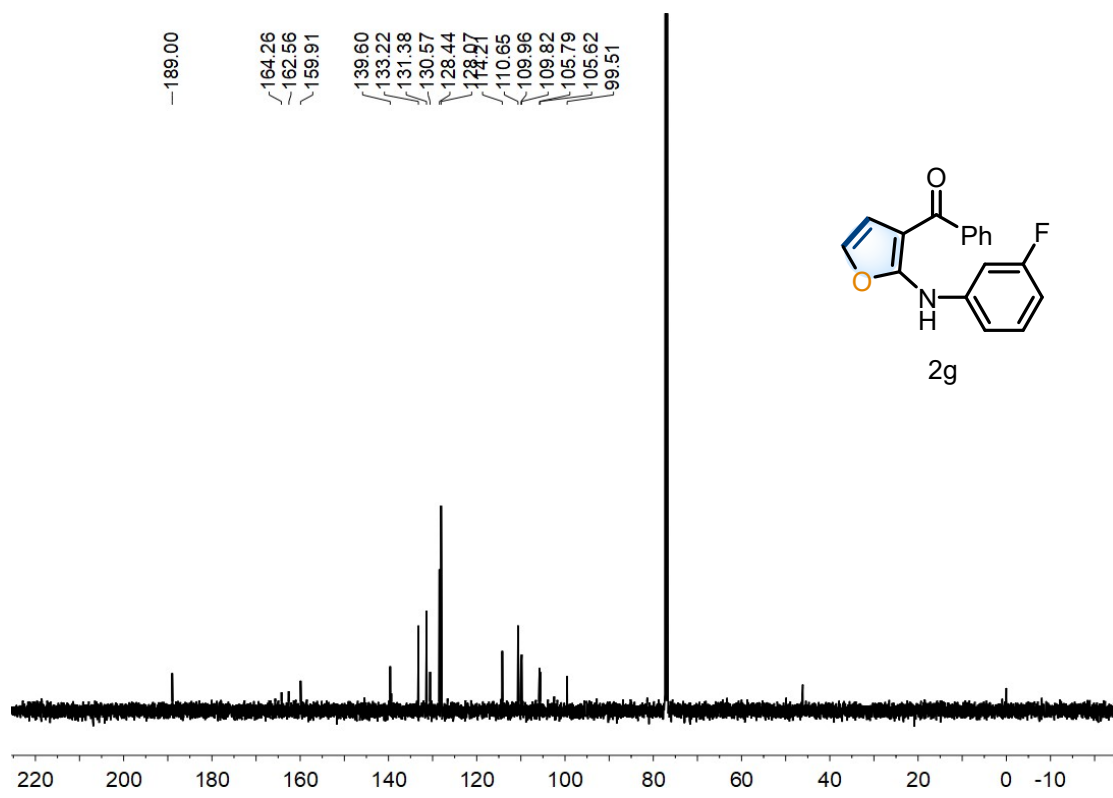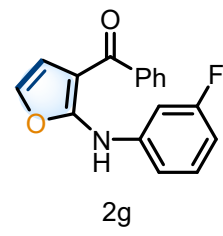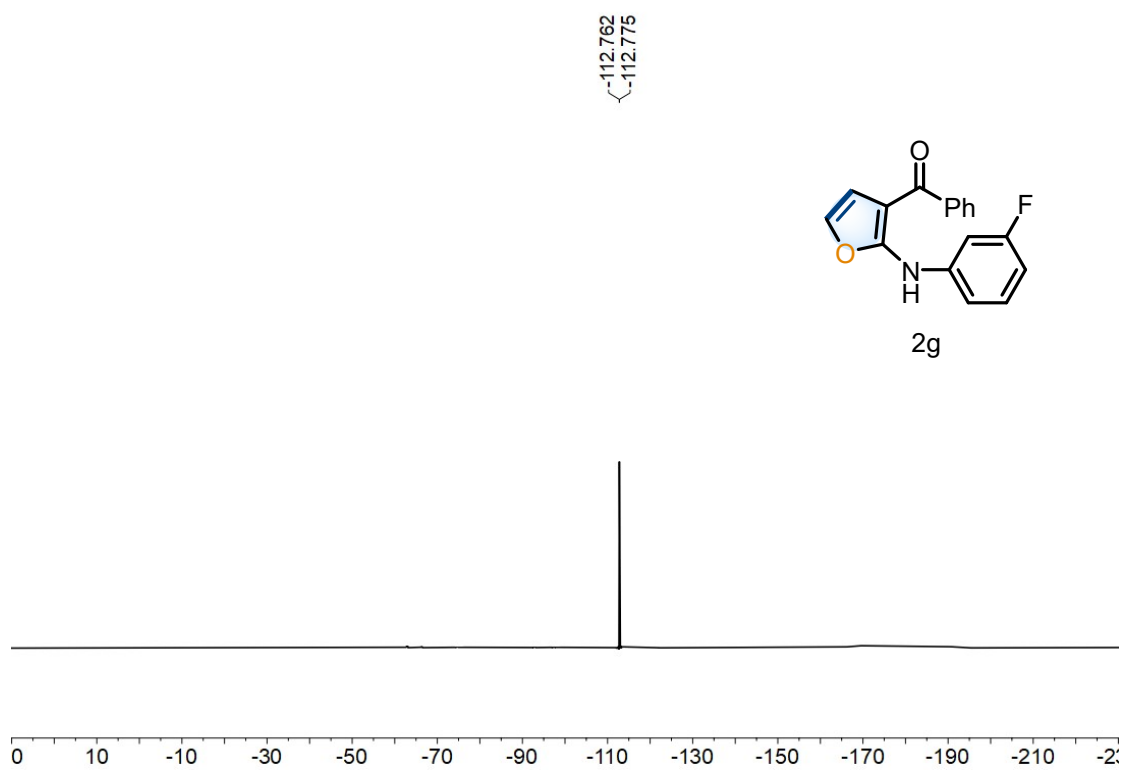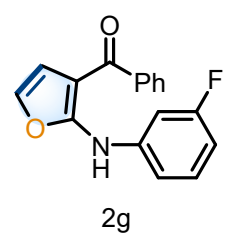



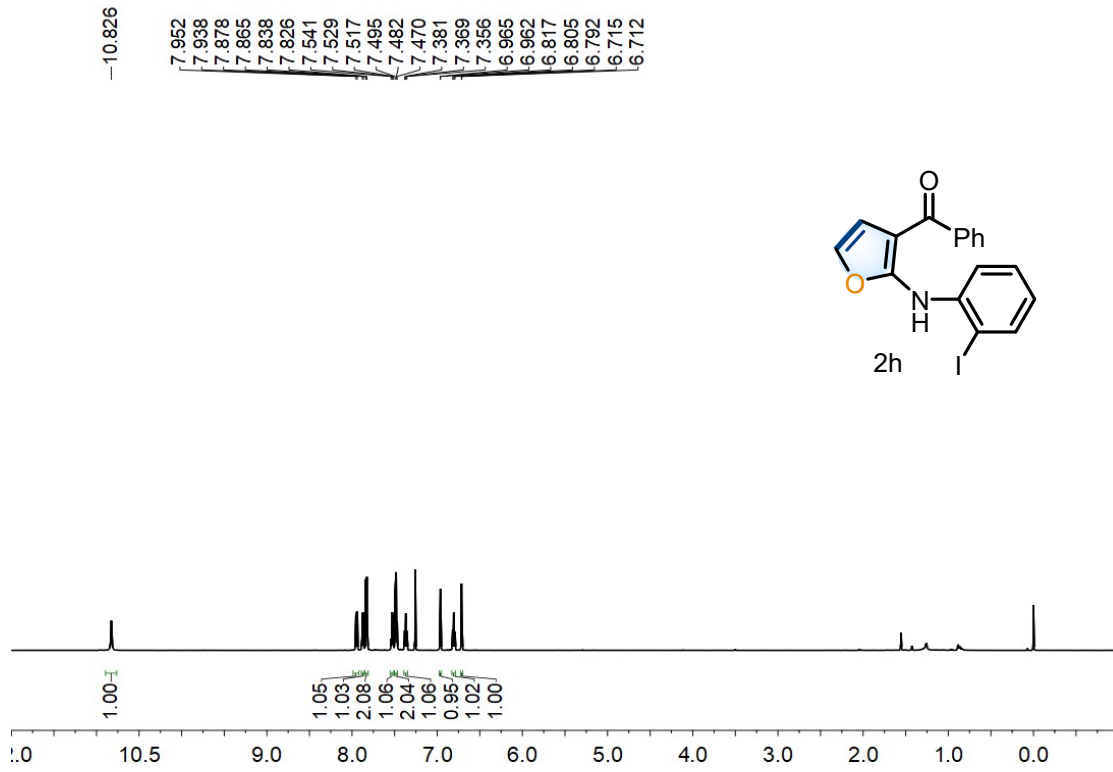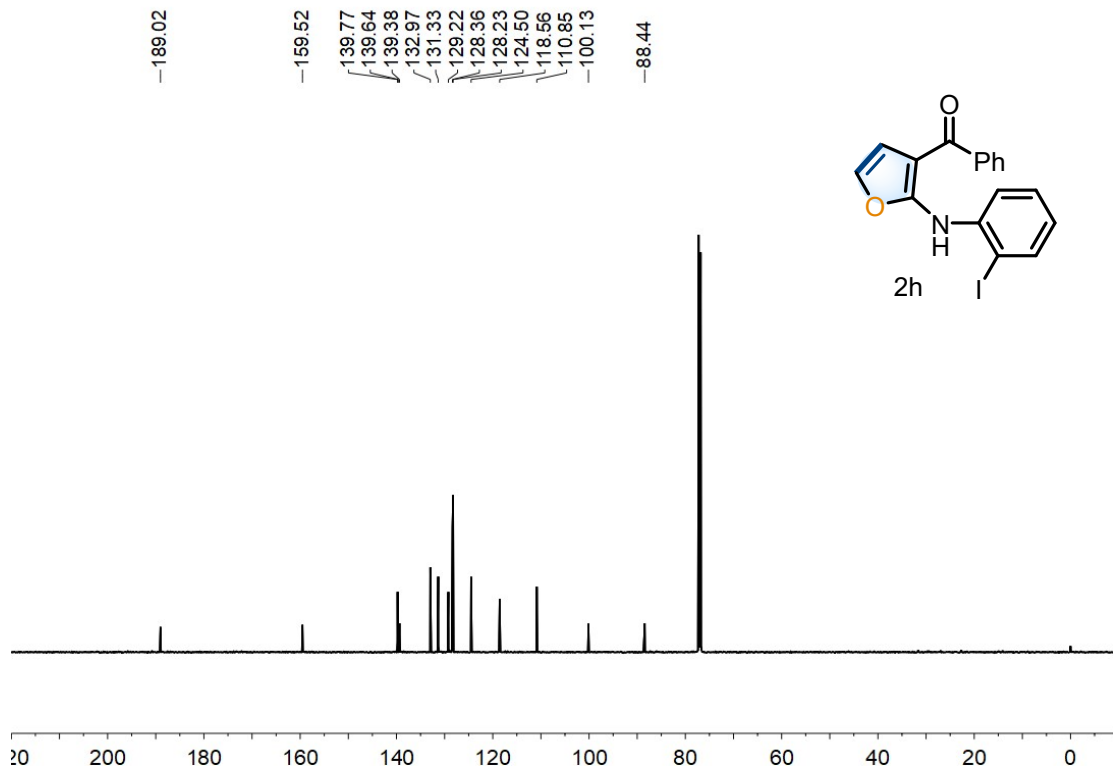

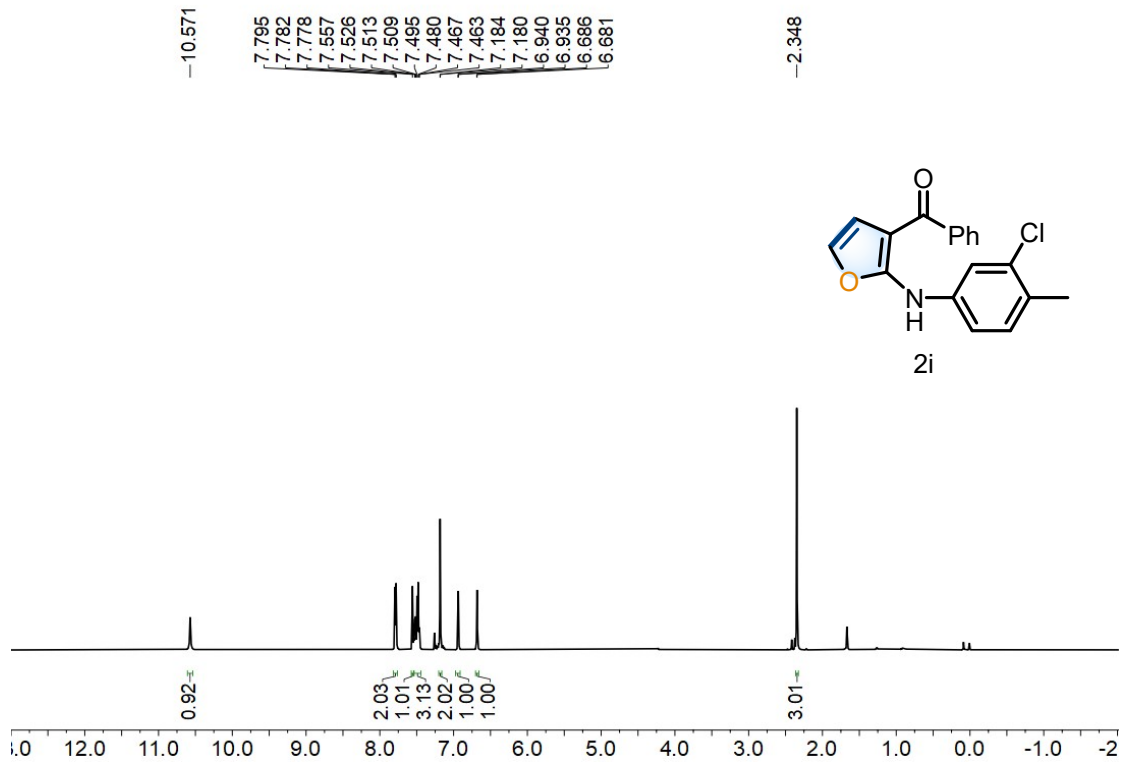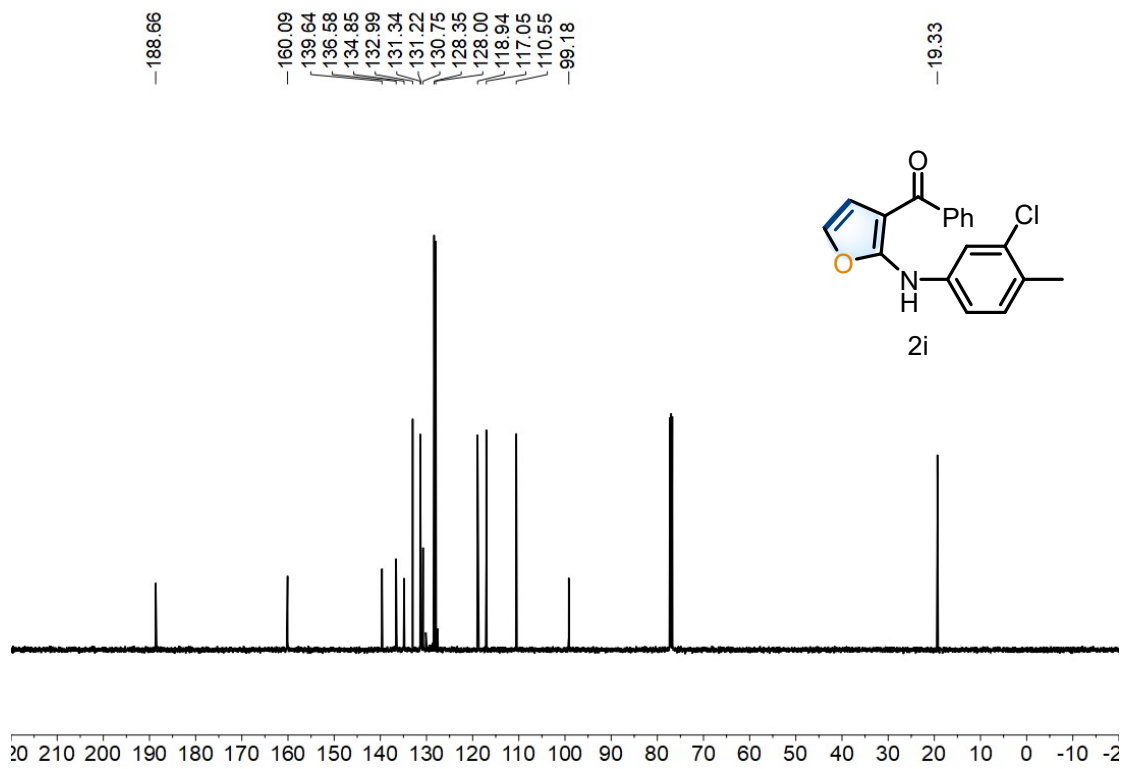

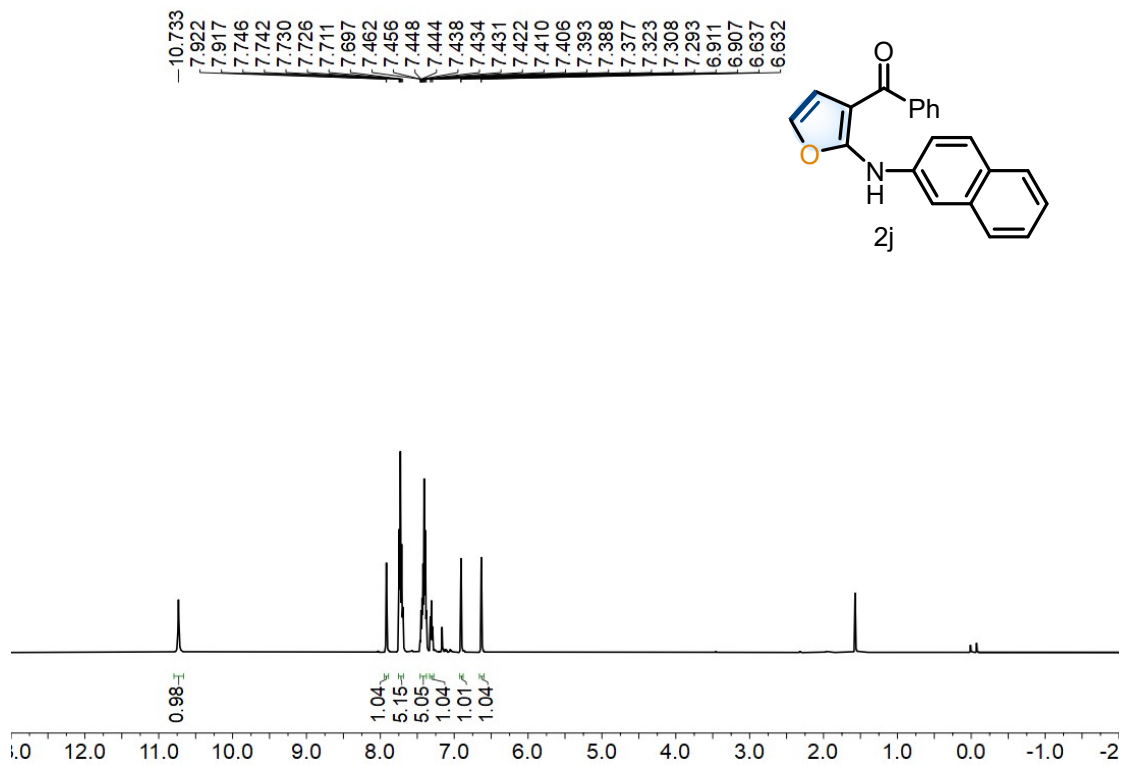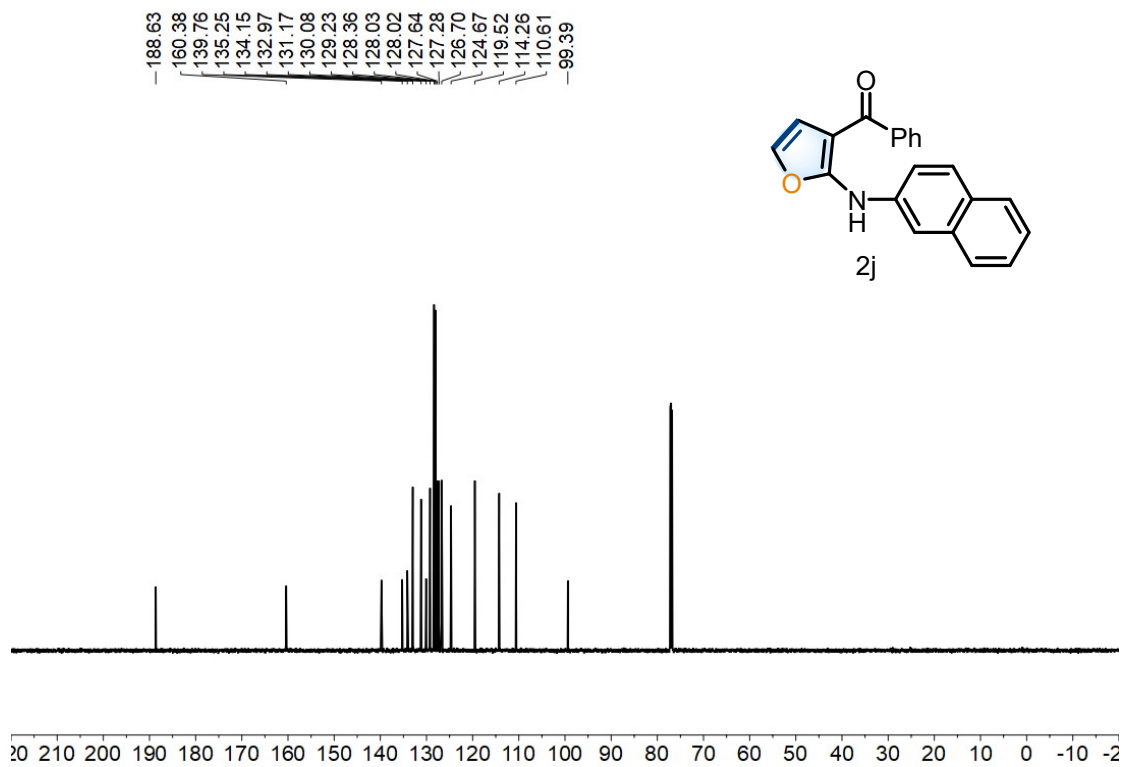

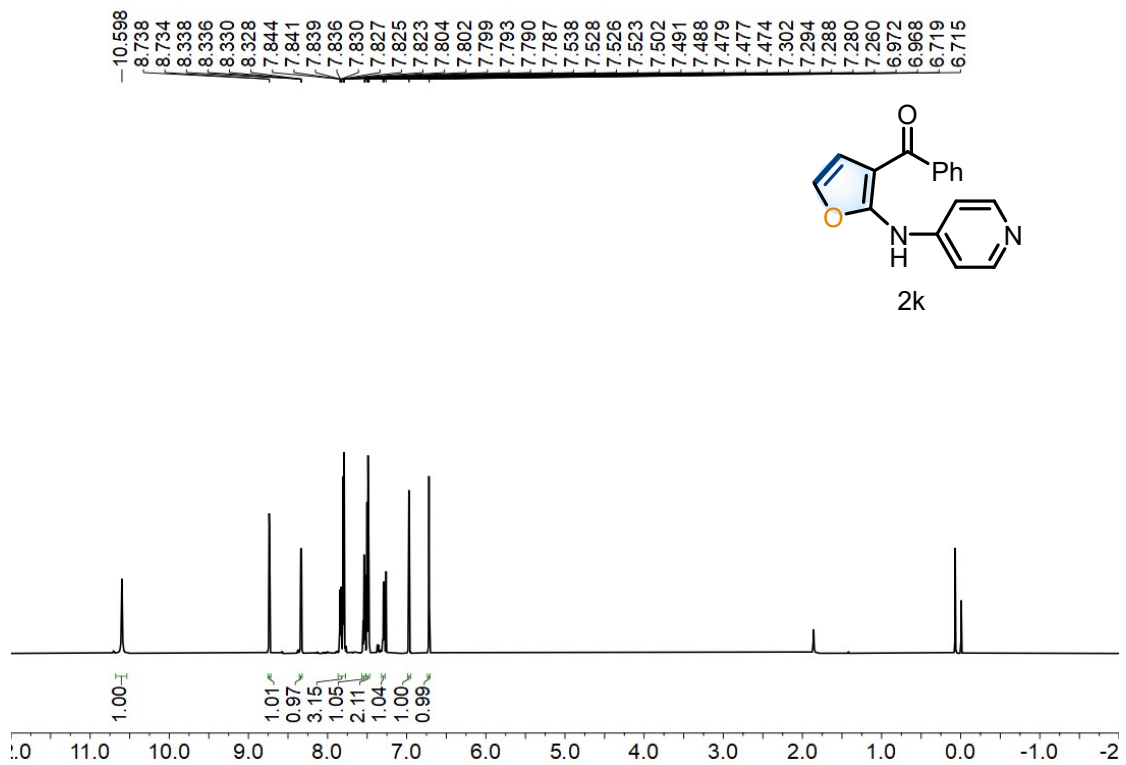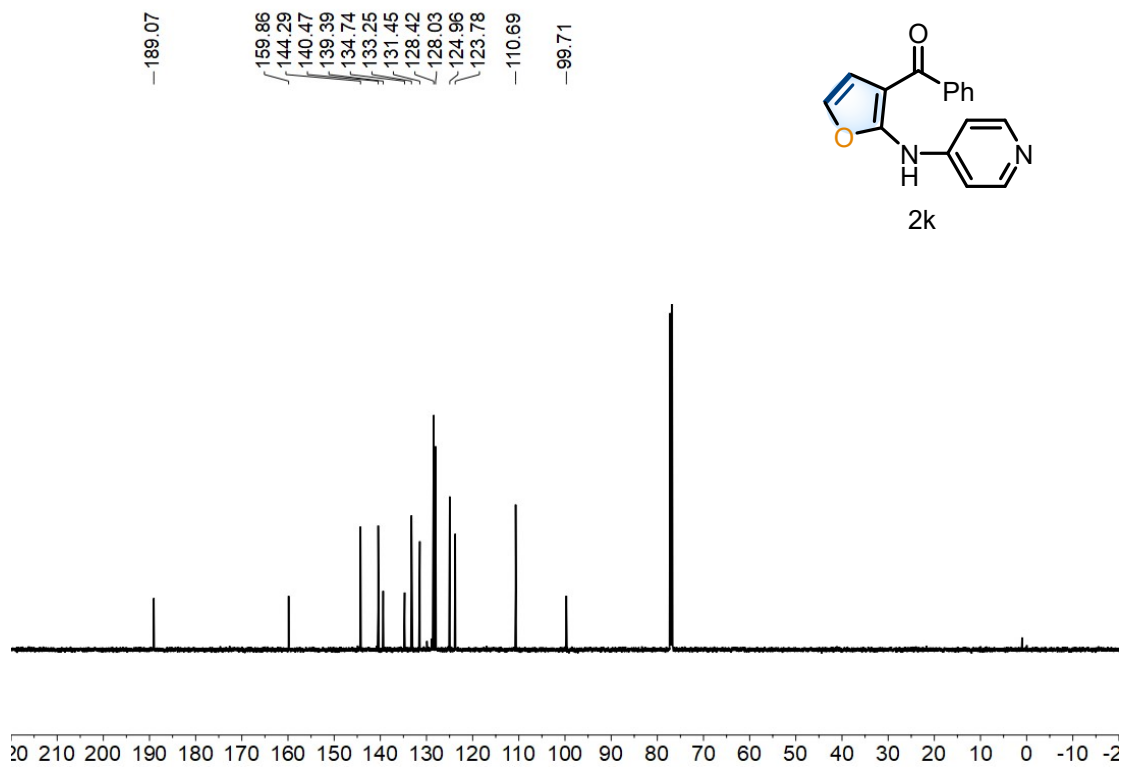

7.764  
7.752  
7.512  
7.500  
7.496  
7.488  
7.469  
7.456  
7.444  
6.732  
6.728  
6.554  
6.550  
6.453

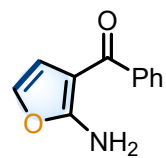

21

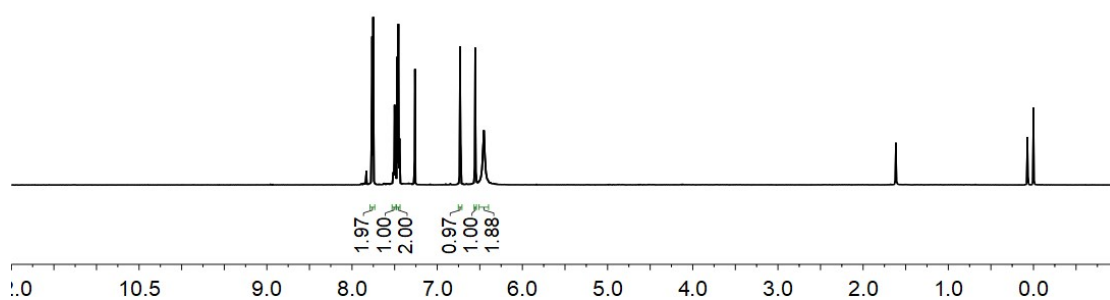

-189.01  
-164.13  
139.99  
132.12  
131.02  
128.30  
128.00  
-110.73  
-98.14

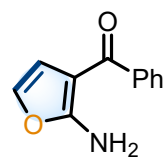

21

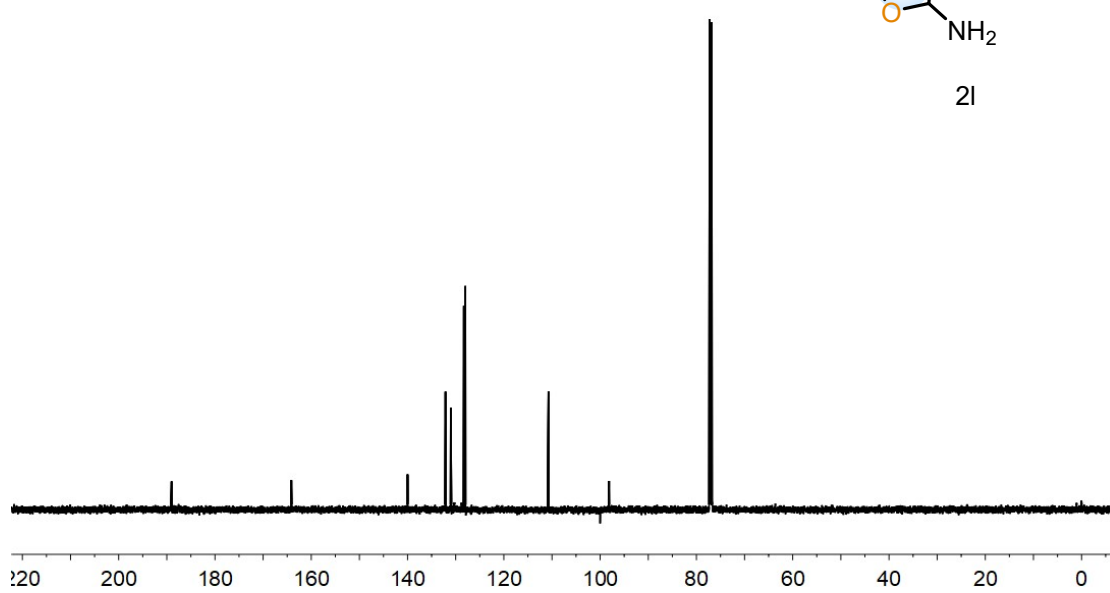

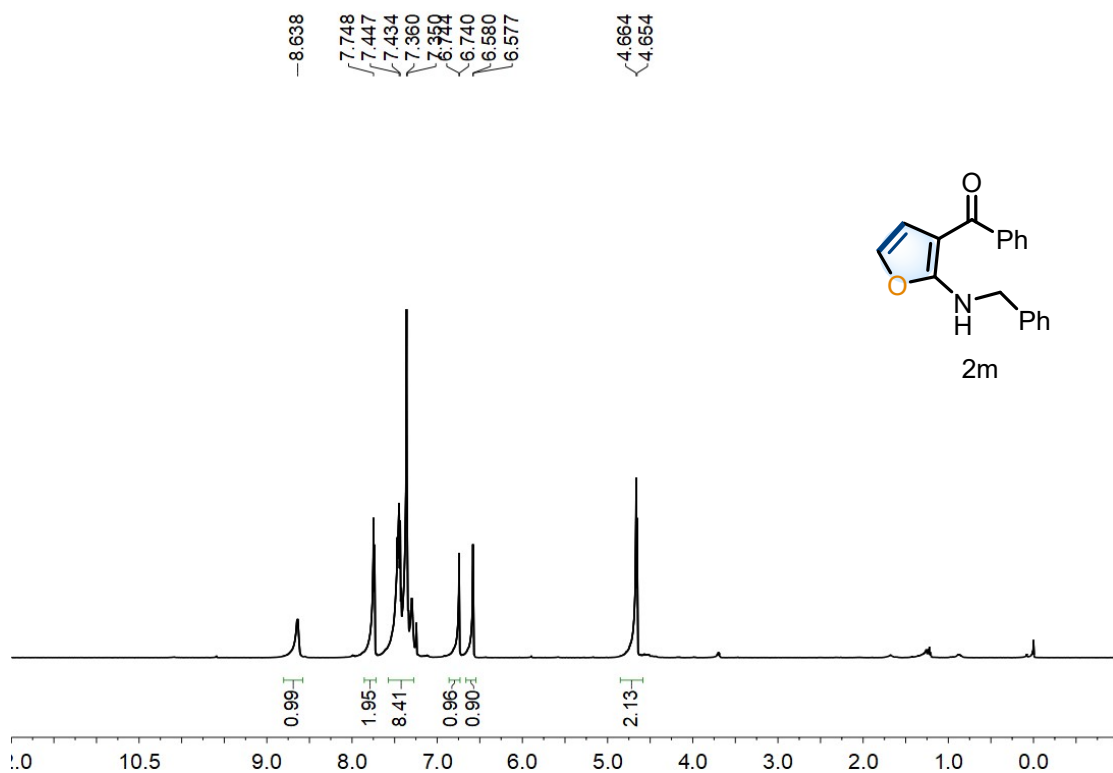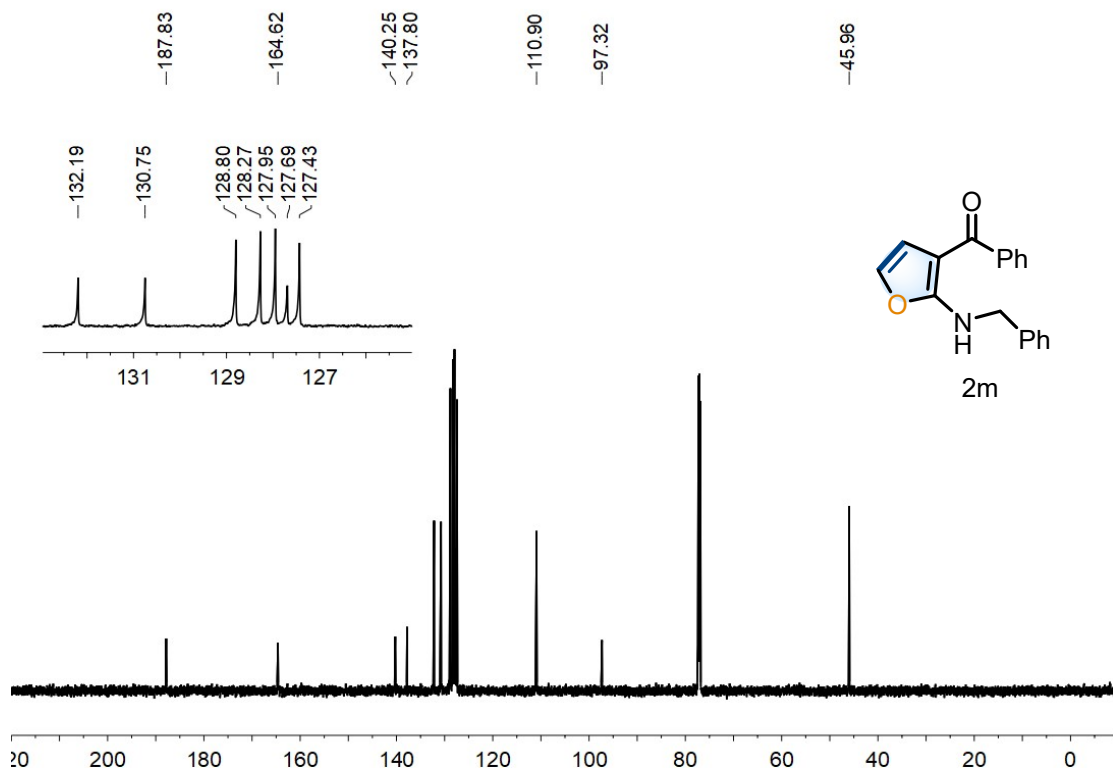

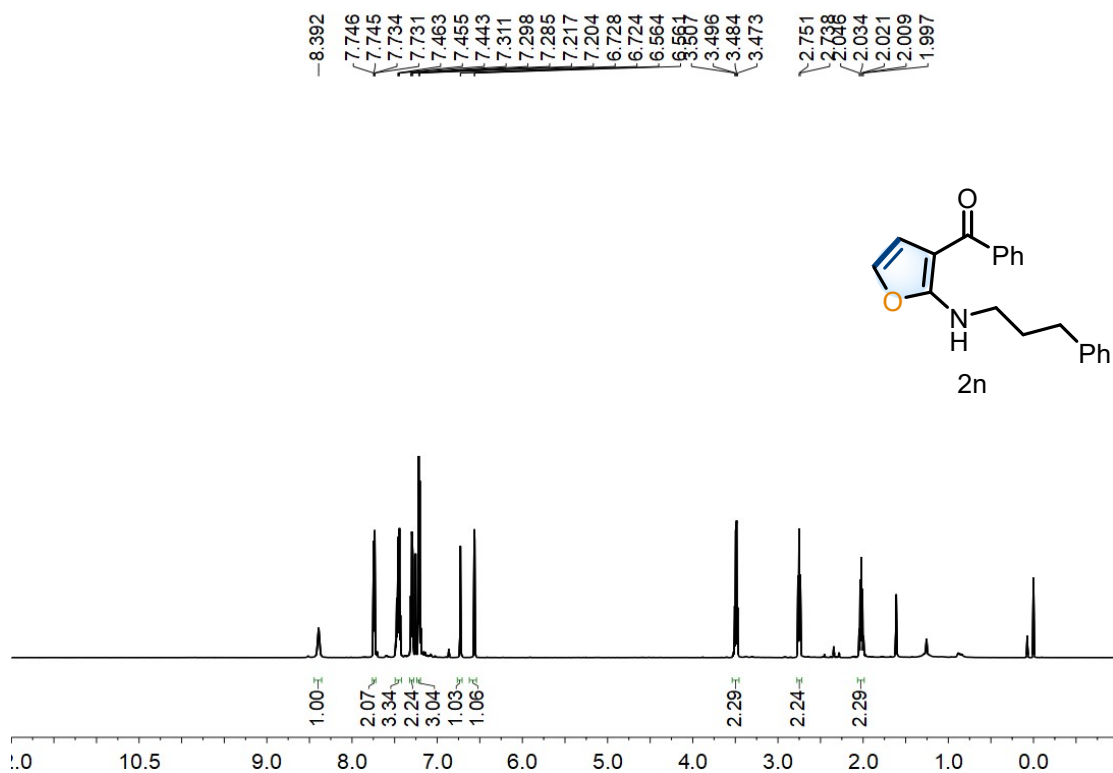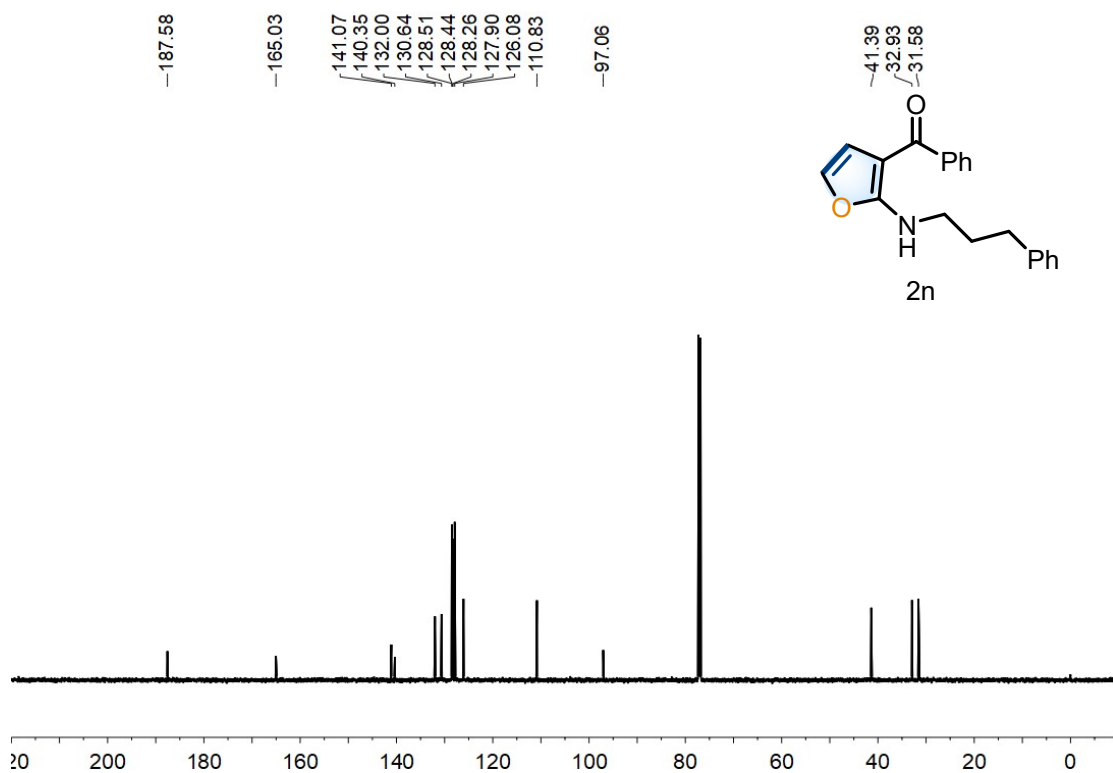

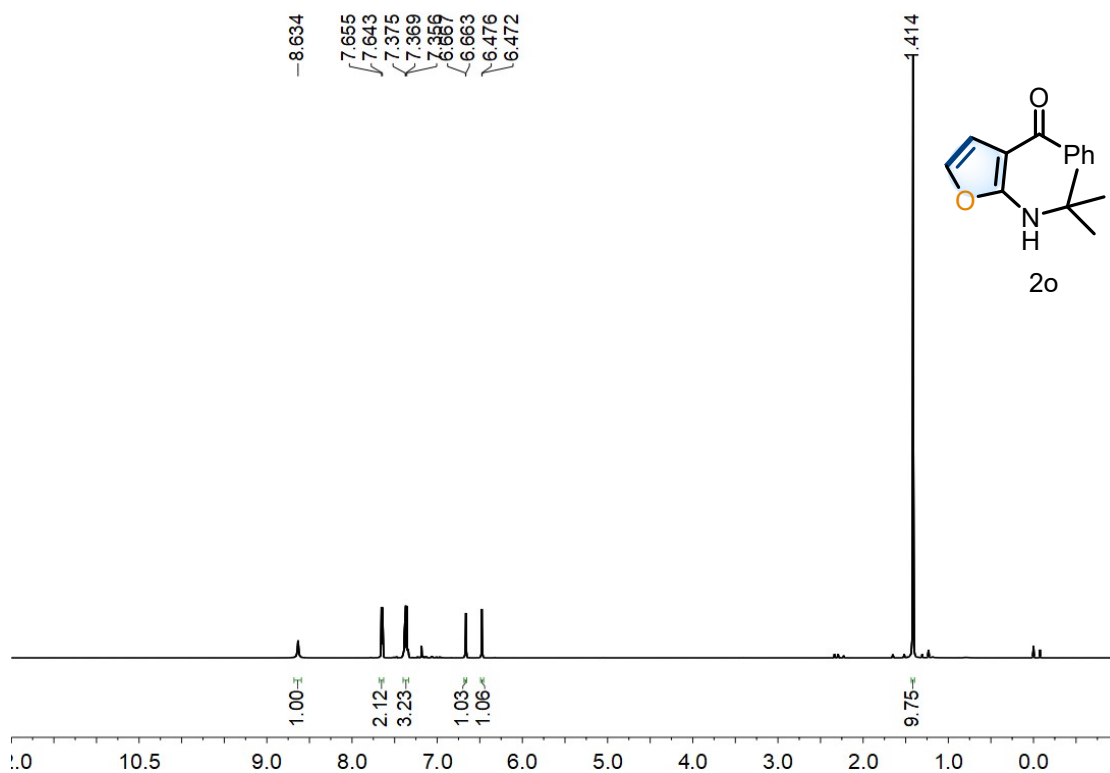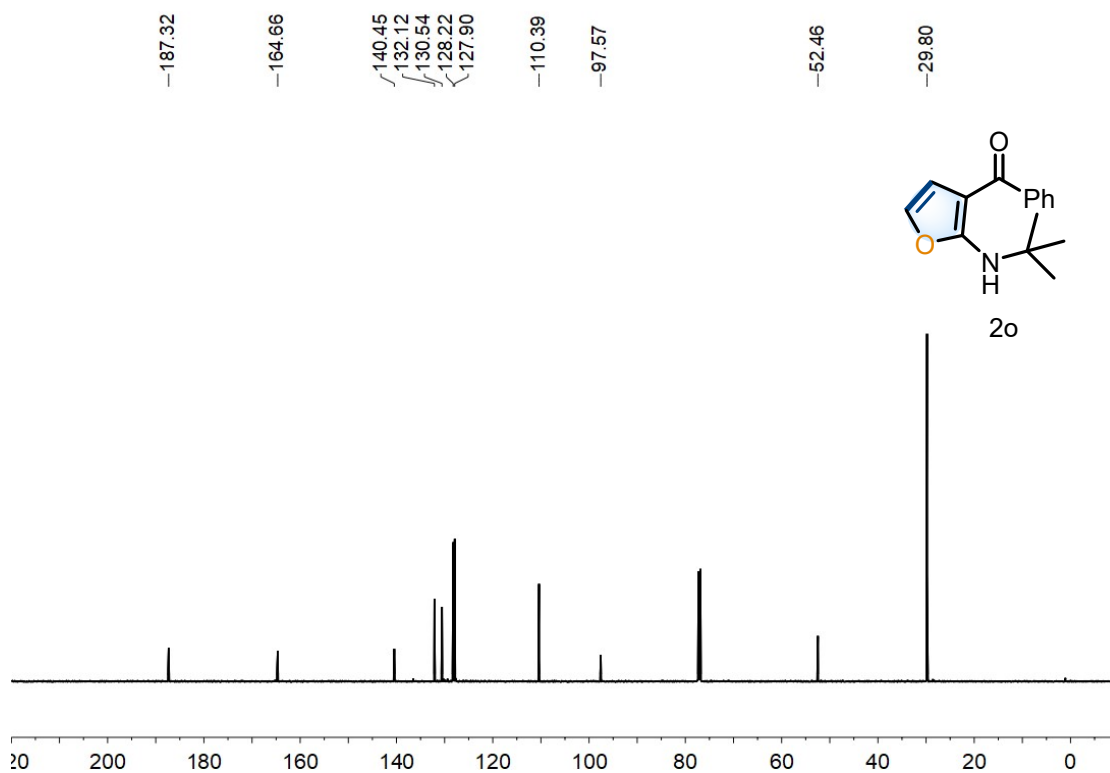



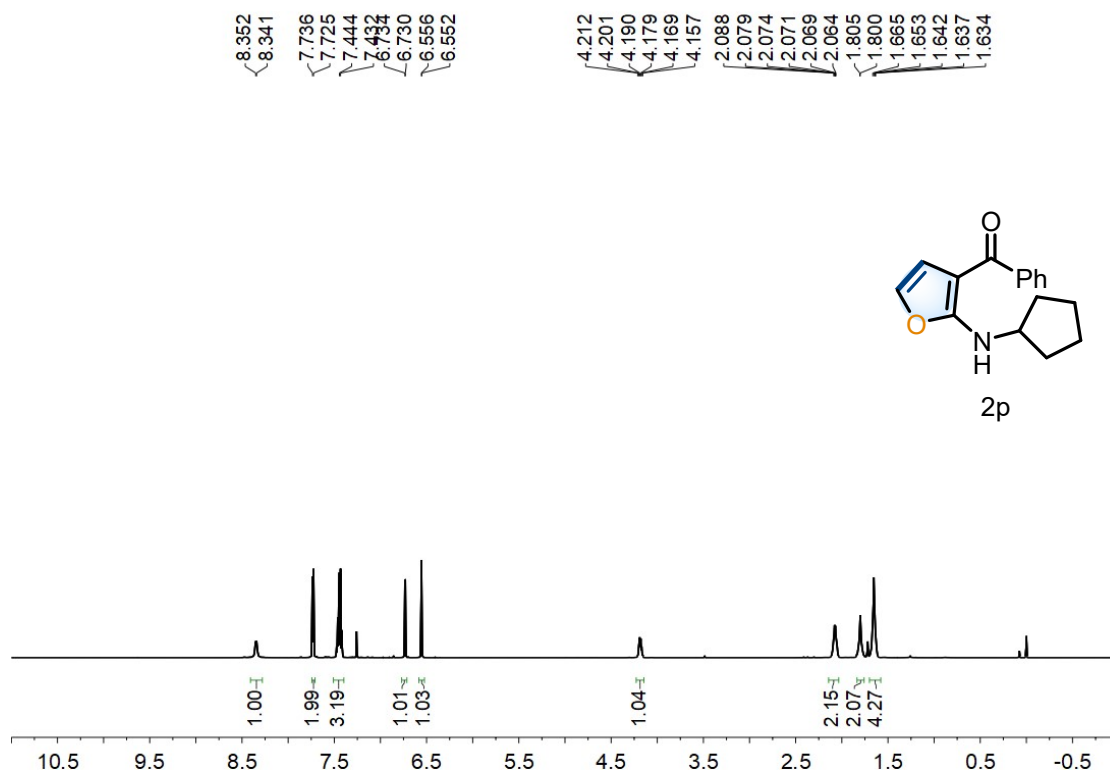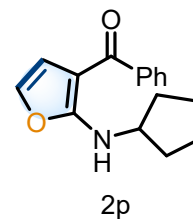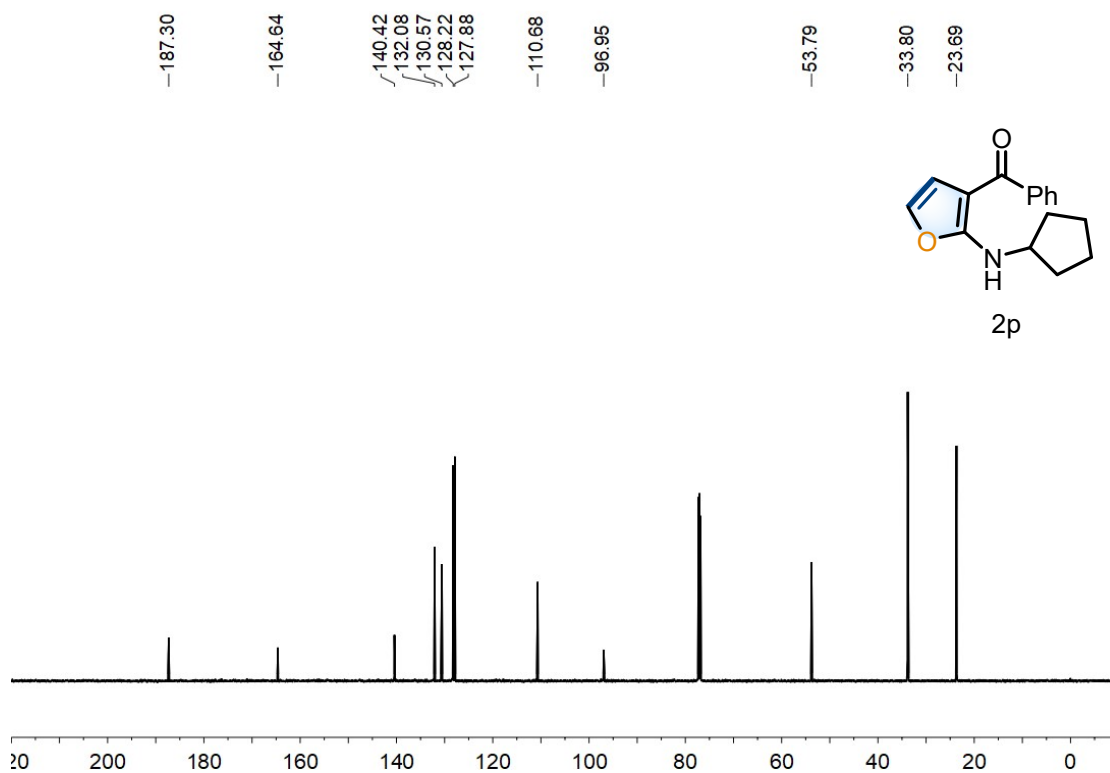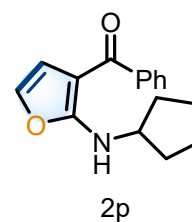

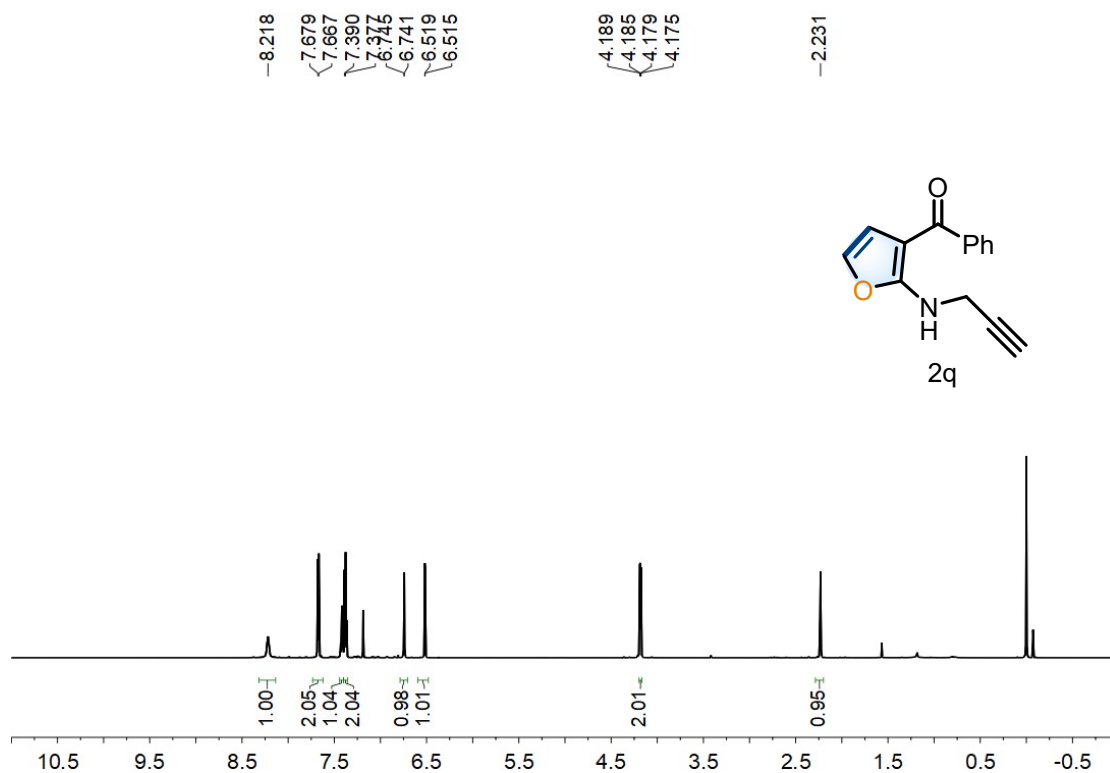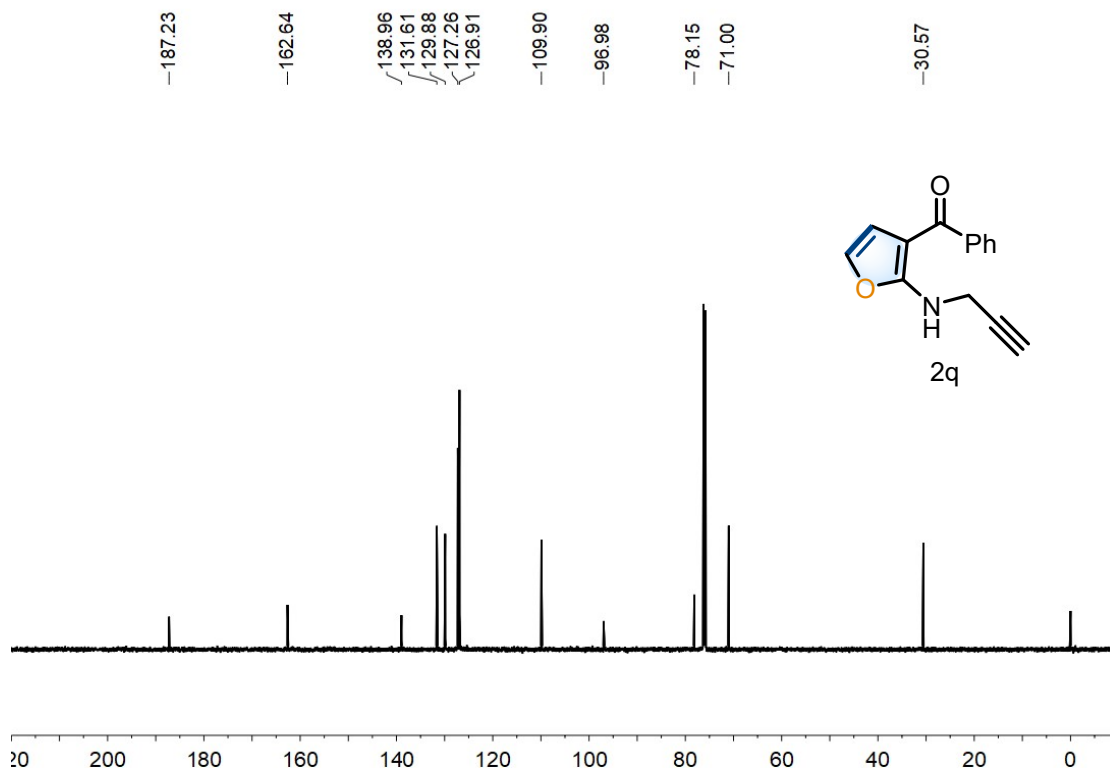

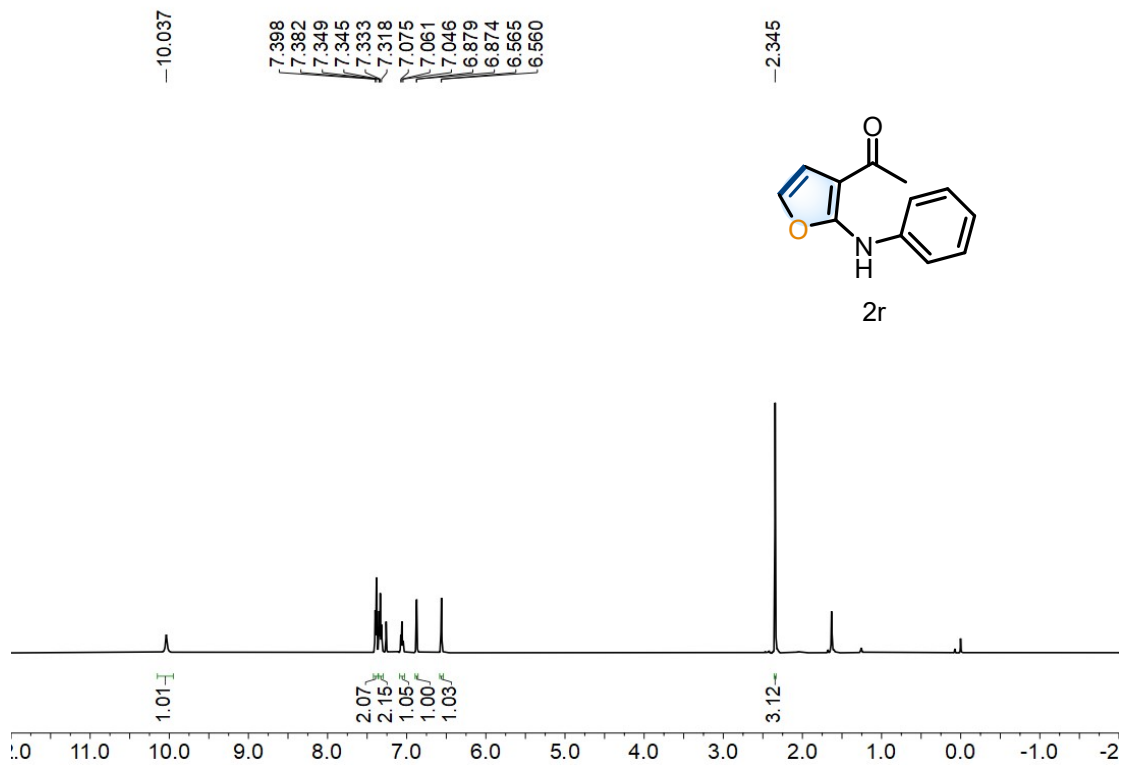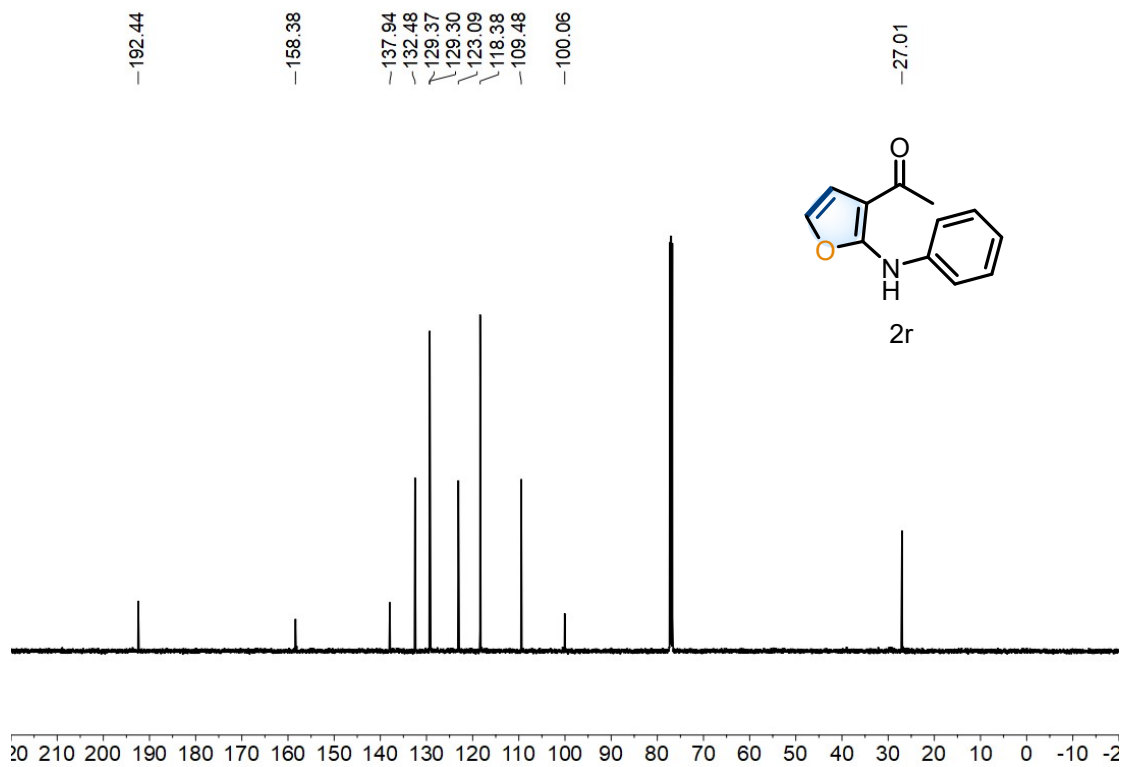

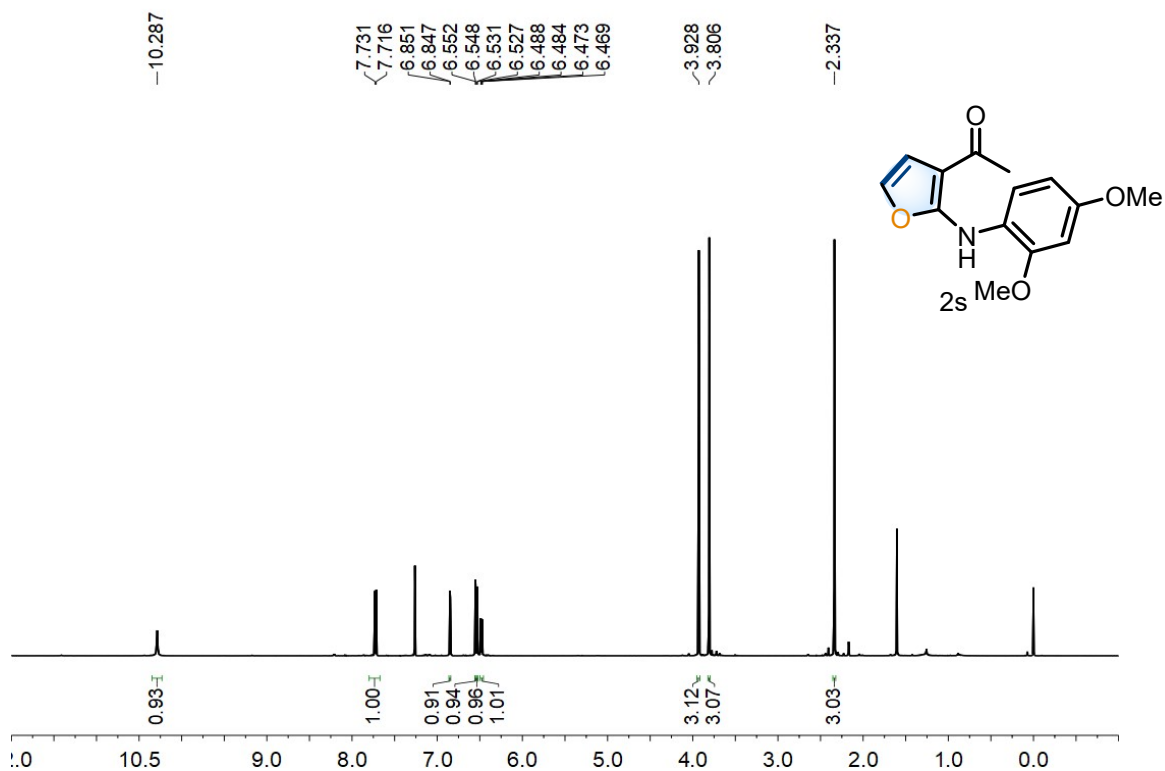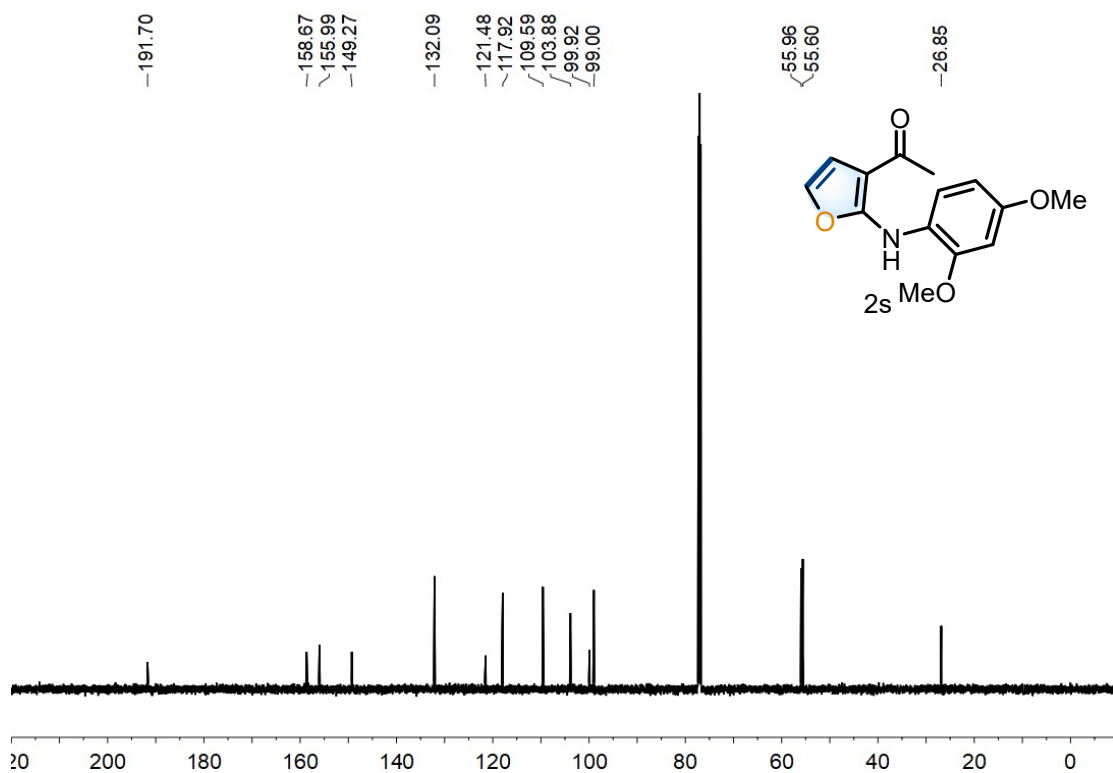

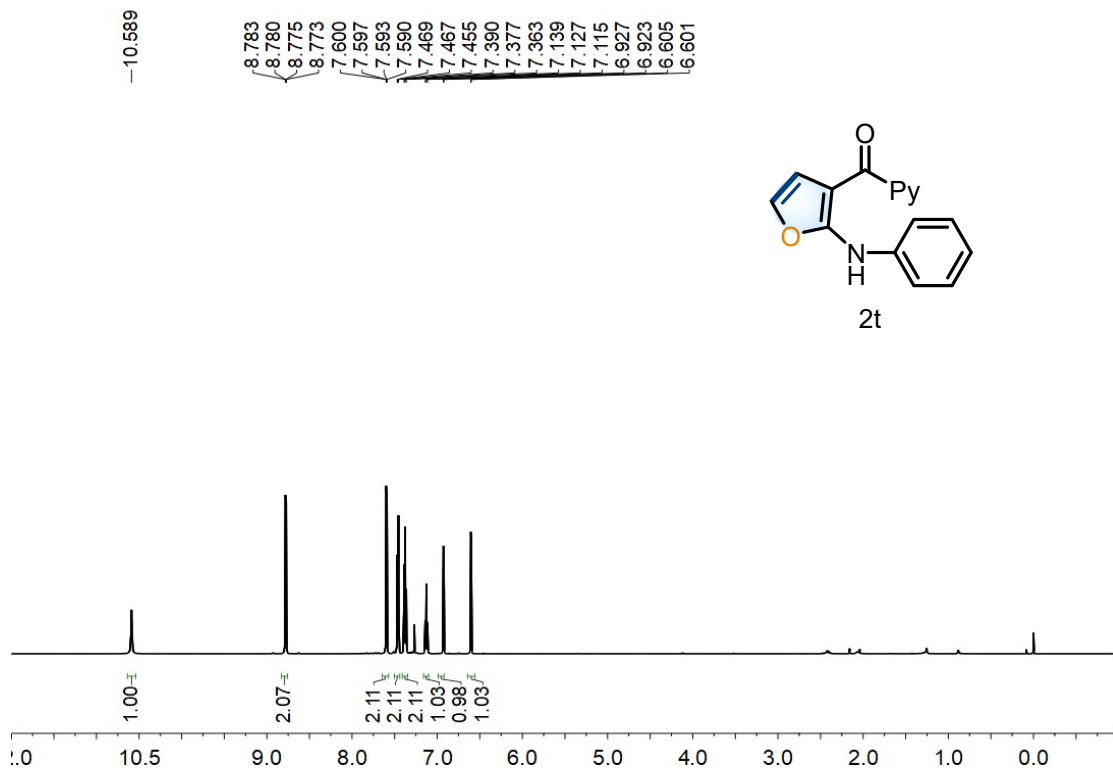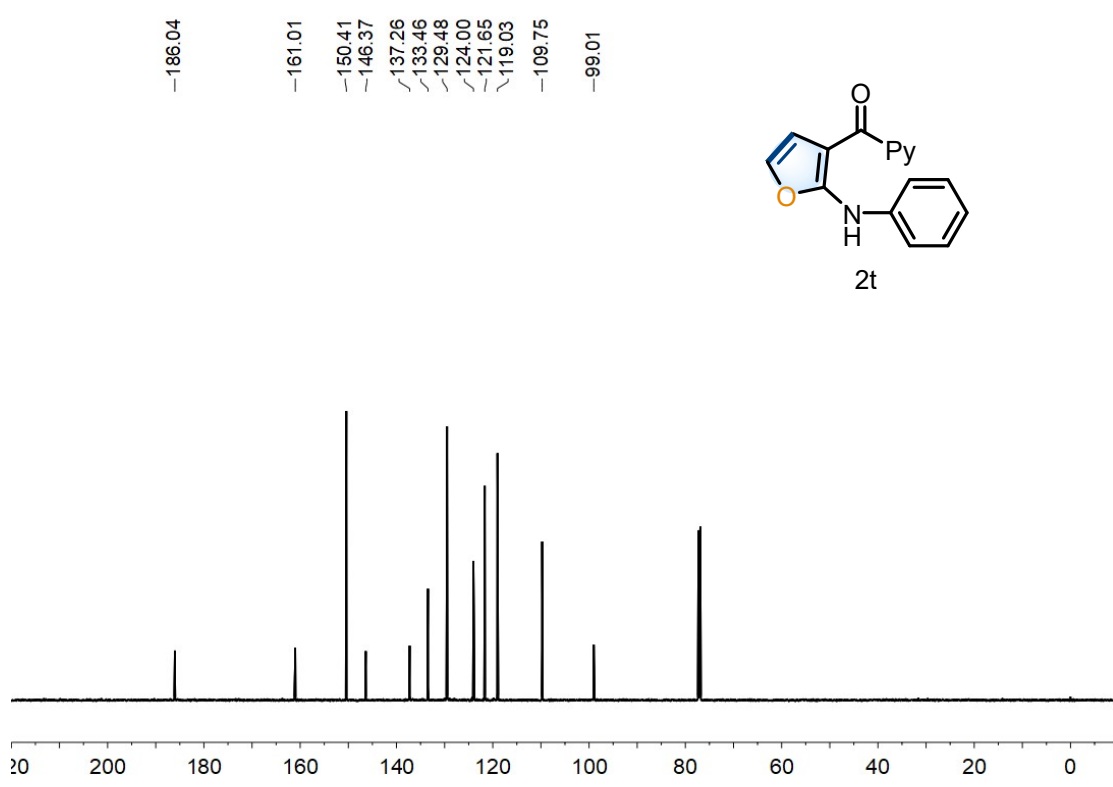

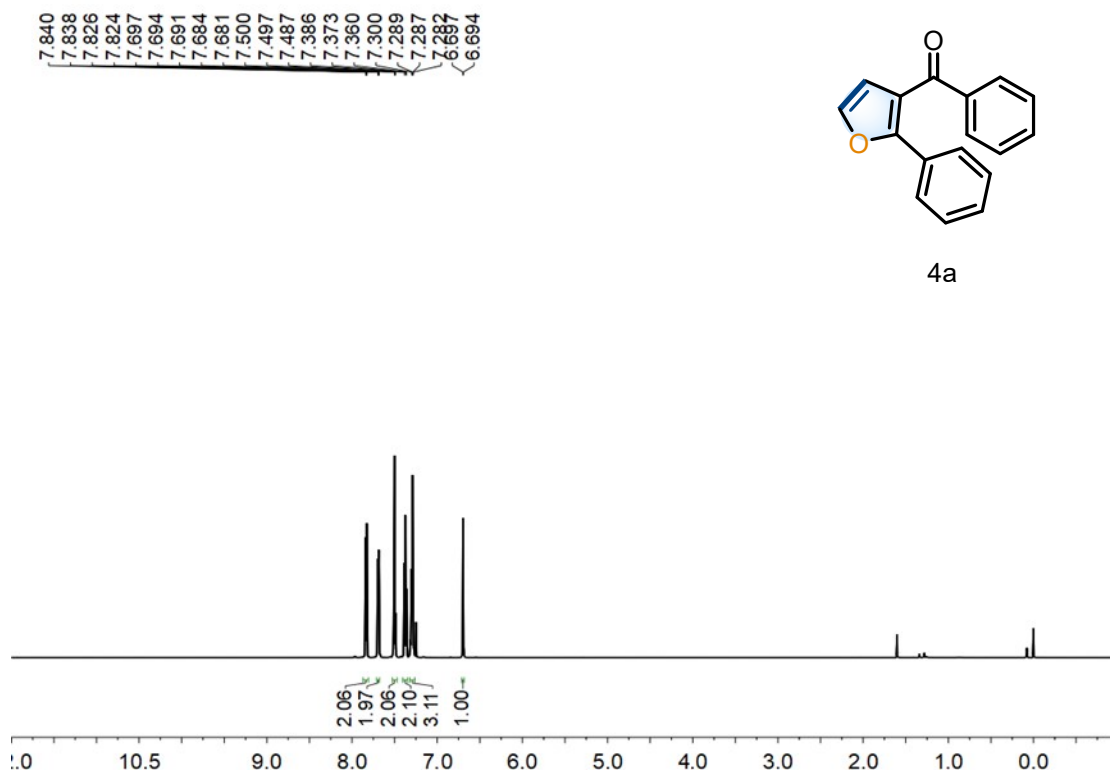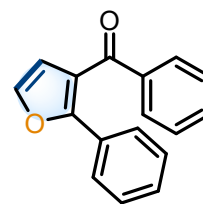

4a

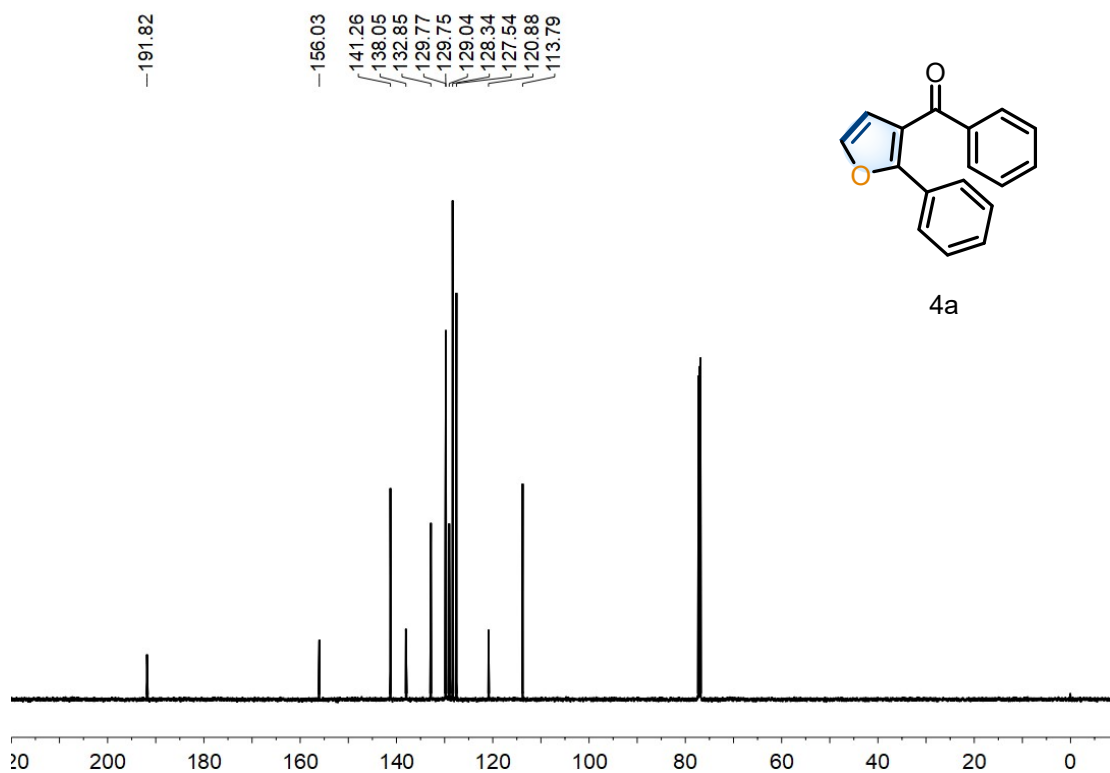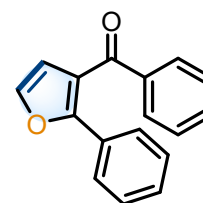

4a

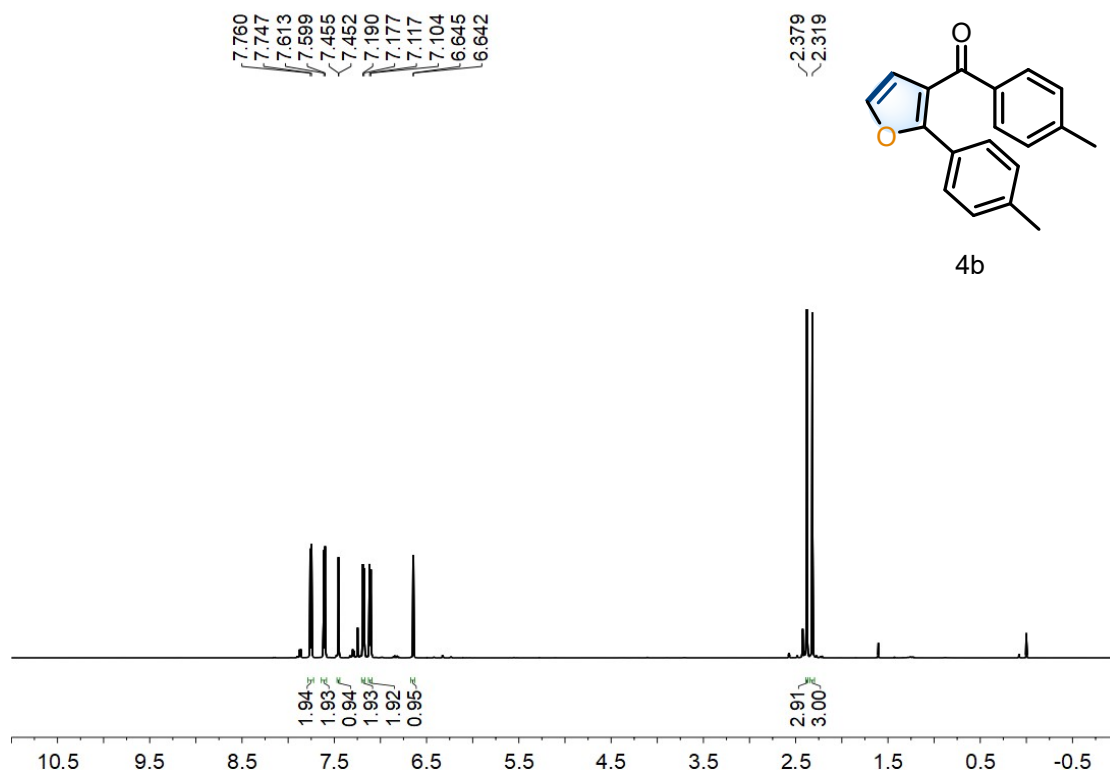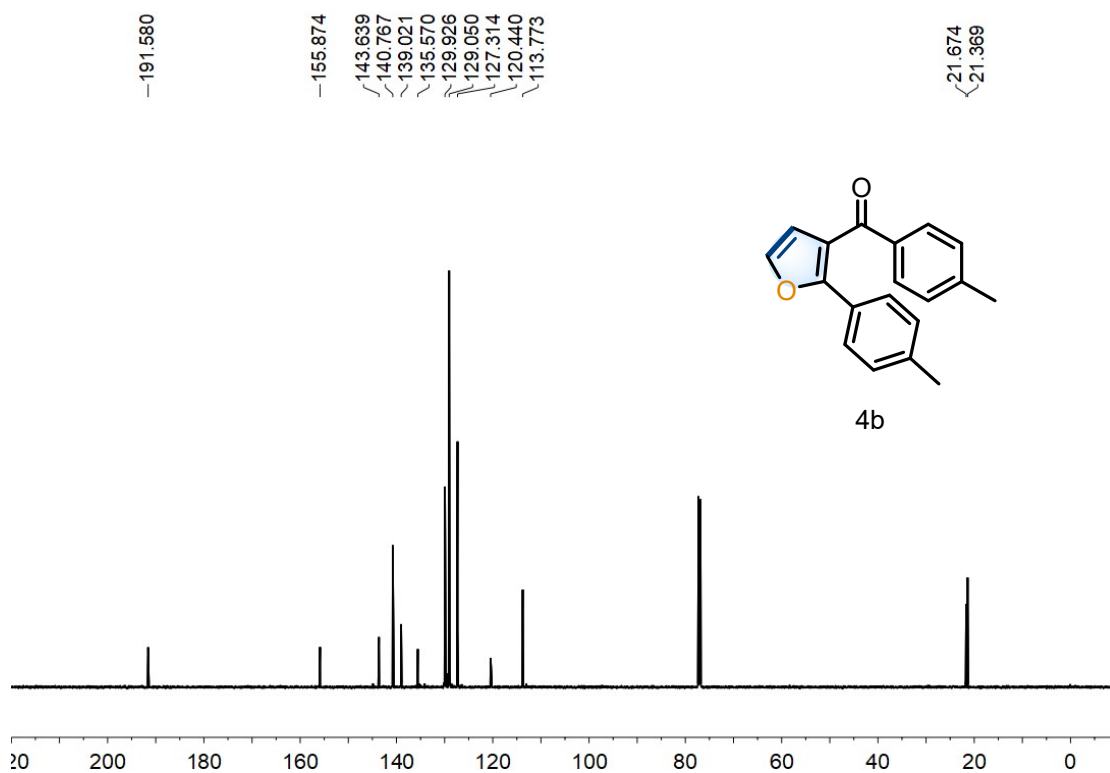

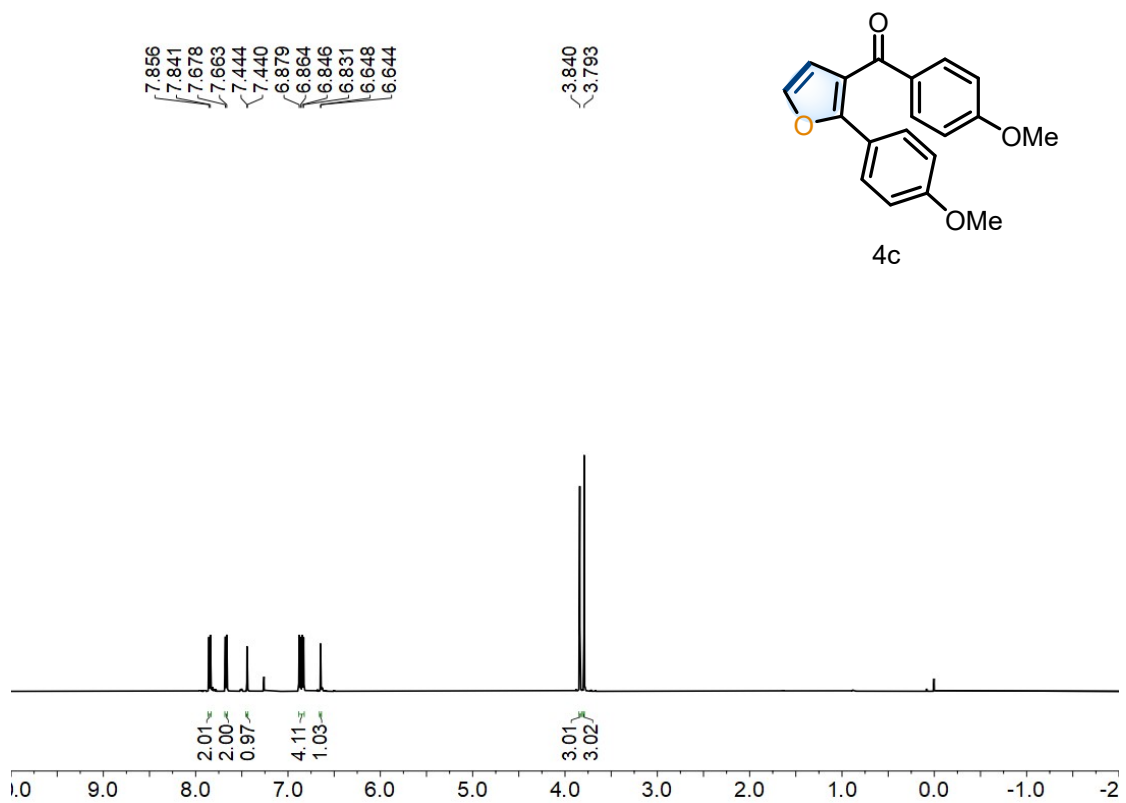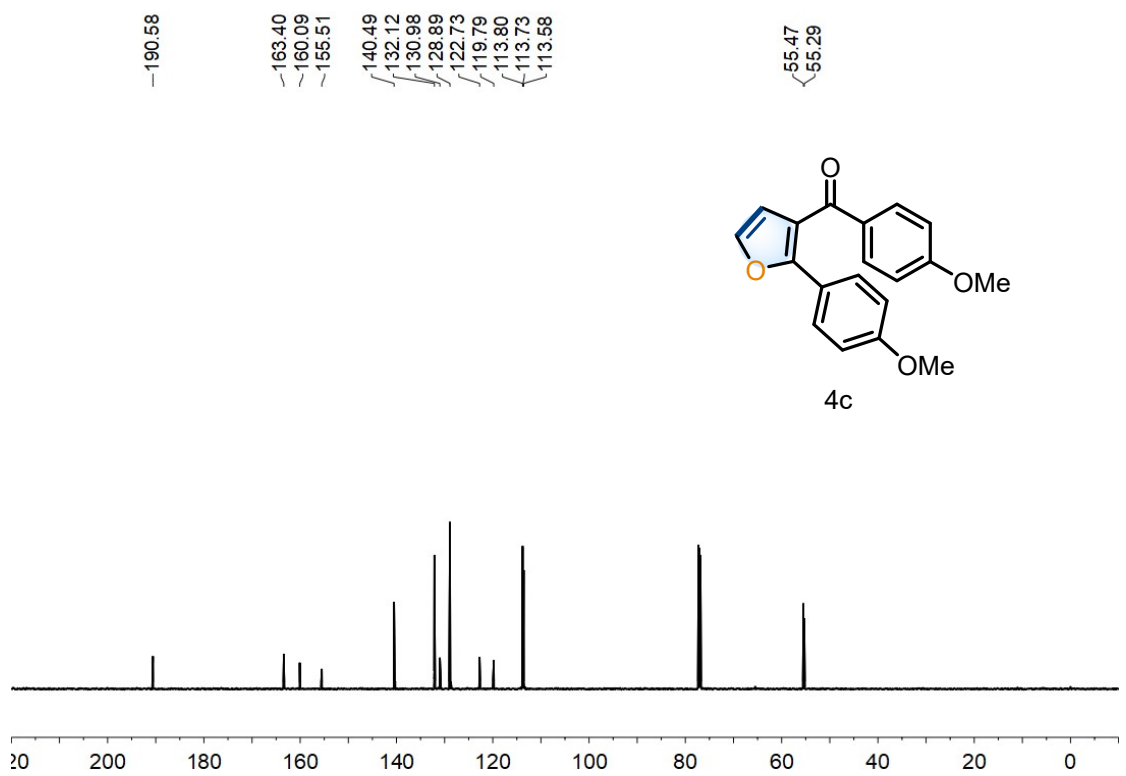



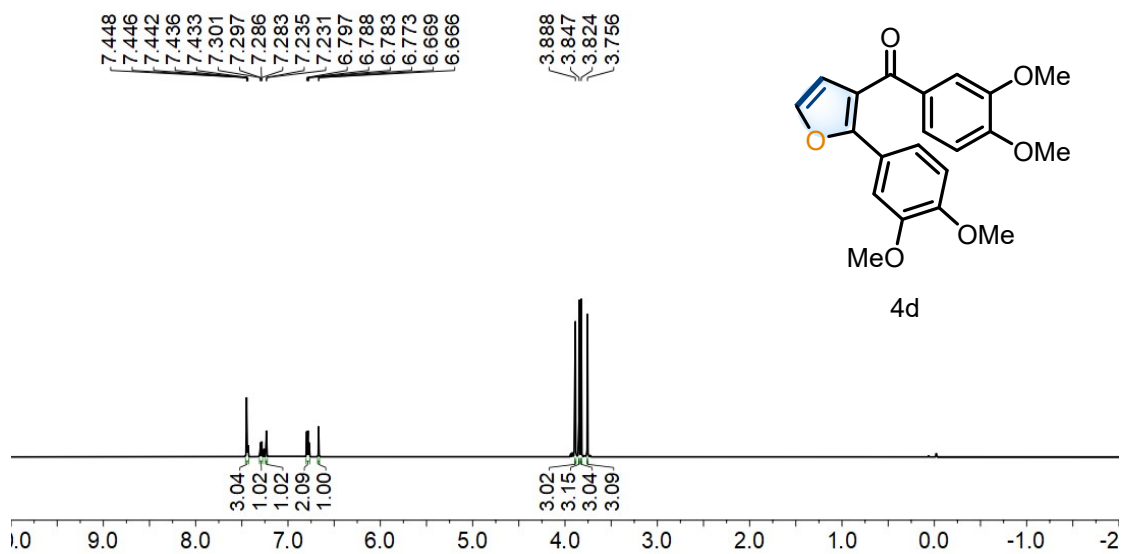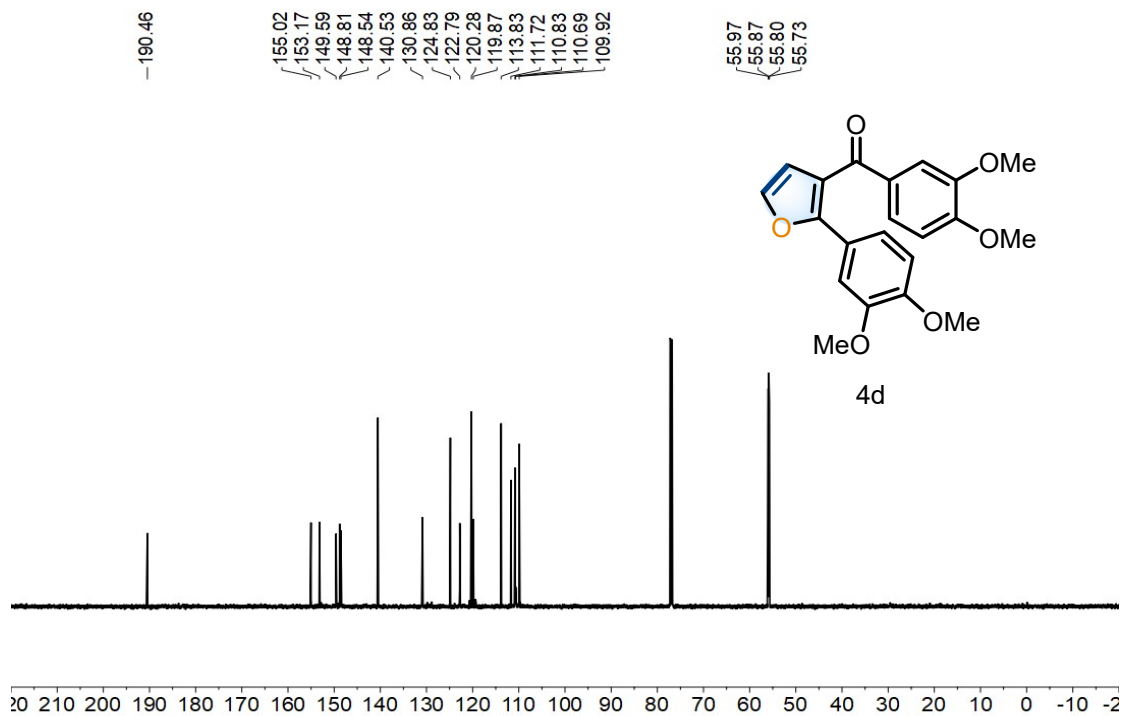

7.692  
7.678  
7.602  
7.588  
7.411  
7.408  
7.299  
7.285  
7.220  
7.206  
6.563  
6.560

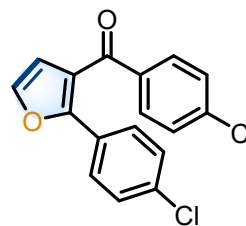

4e

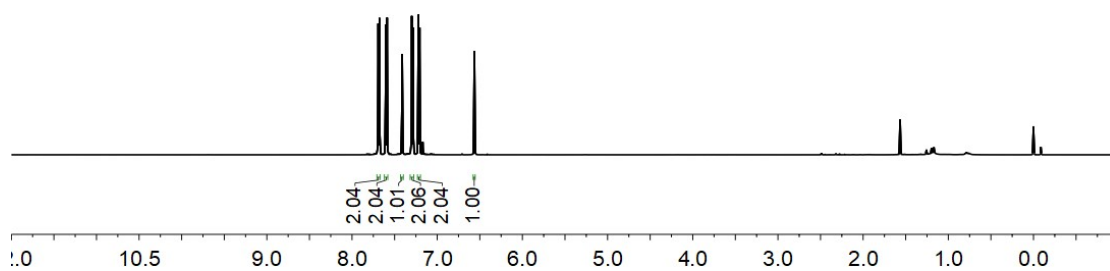

190.17

155.01  
141.54  
139.48  
136.31  
135.26  
131.07  
128.79  
128.73  
128.69  
128.07  
120.80  
113.80

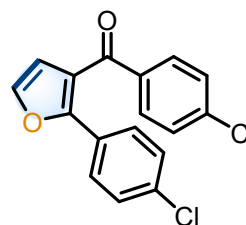

4e

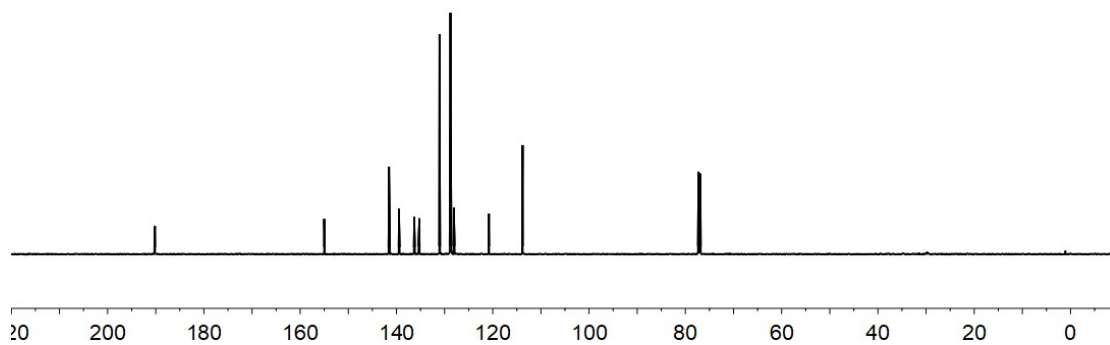

7.635  
7.621  
7.556  
7.542  
7.492  
7.478  
7.437  
7.434  
7.402  
7.388  
6.578  
6.575

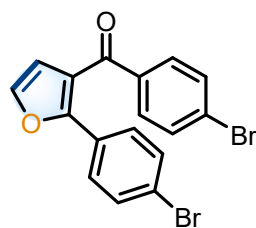

4f

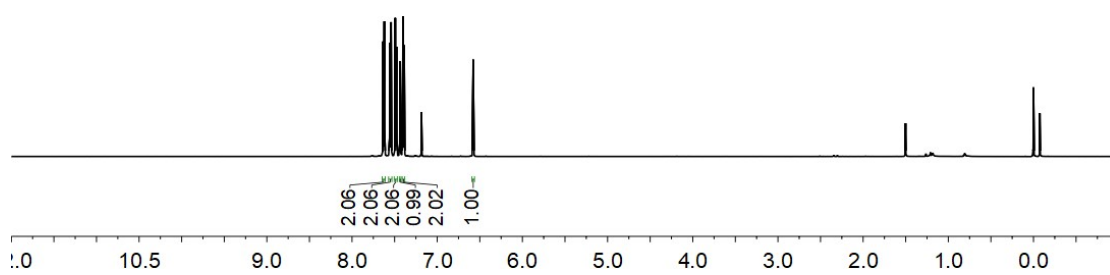

190.36

155.06  
141.58  
136.71  
131.79  
128.93  
128.48  
128.22  
123.63  
120.82  
113.82

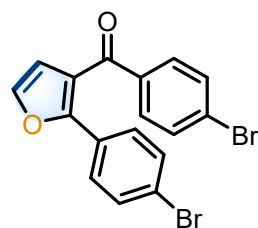

4f

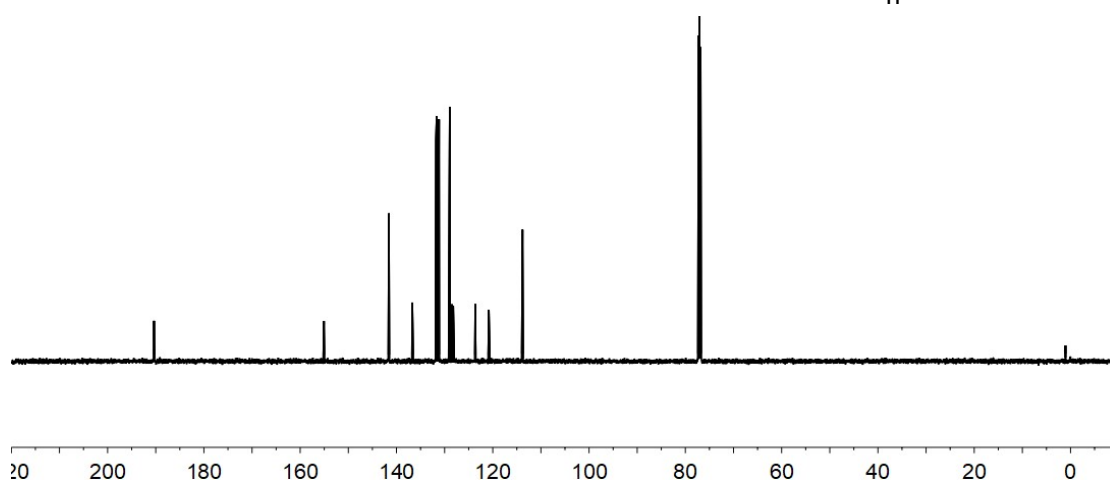

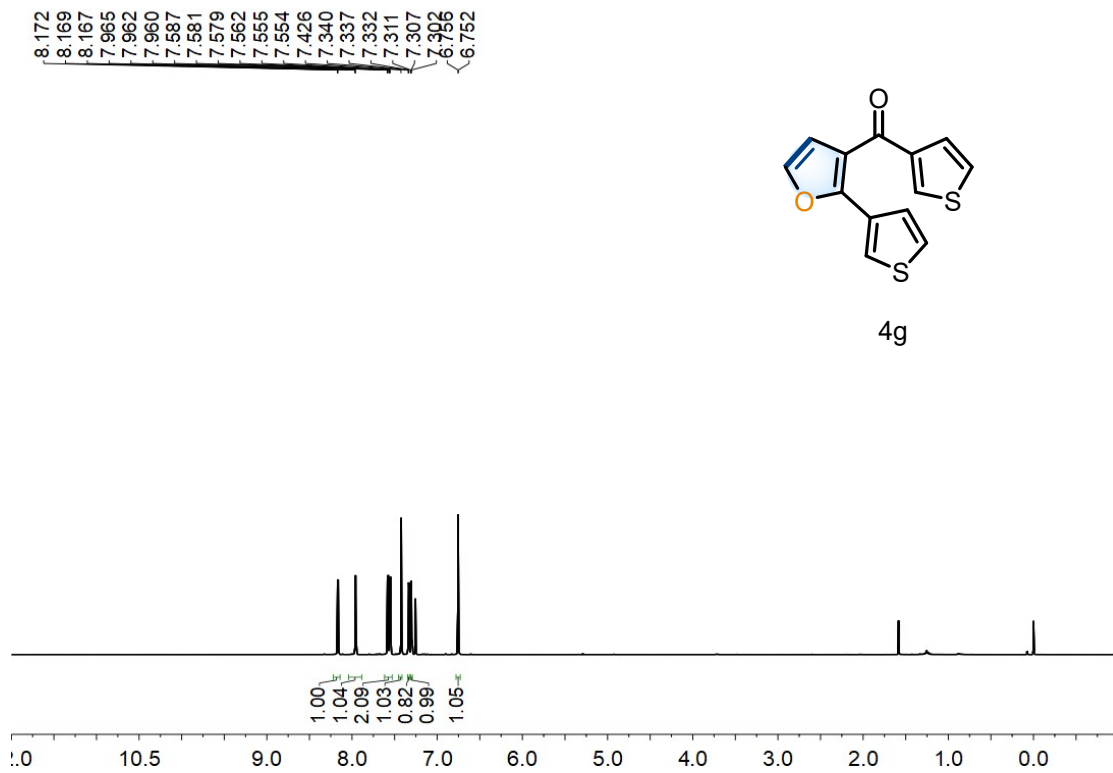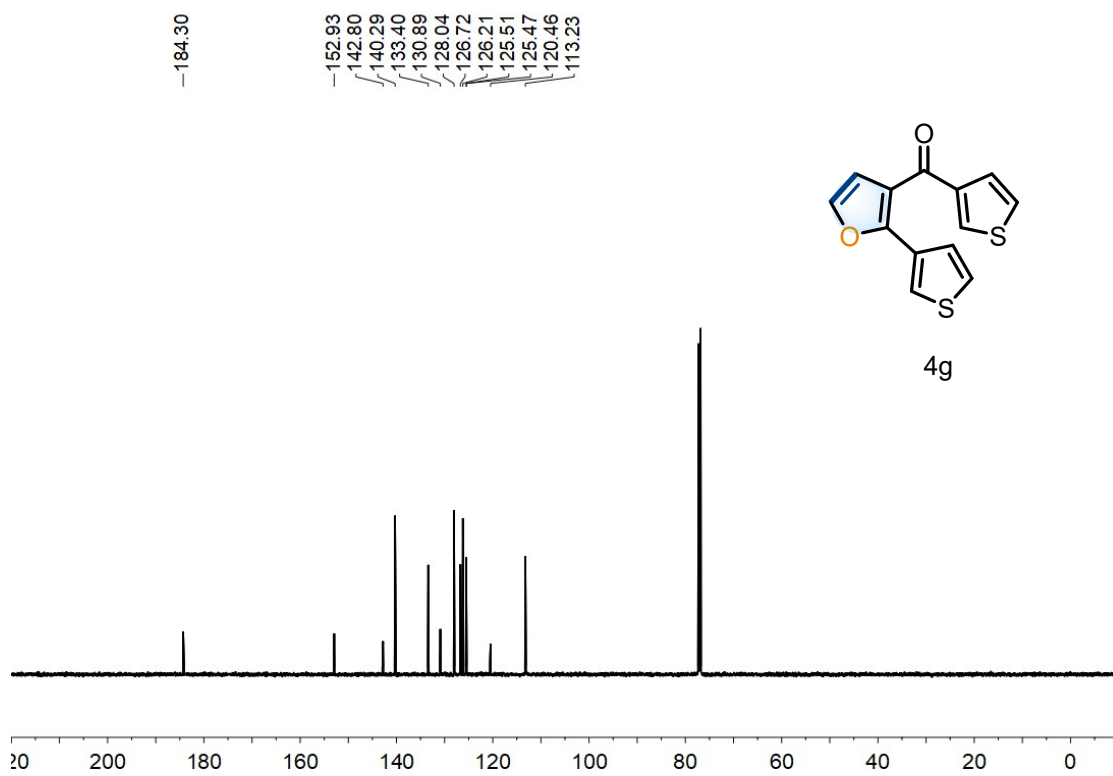

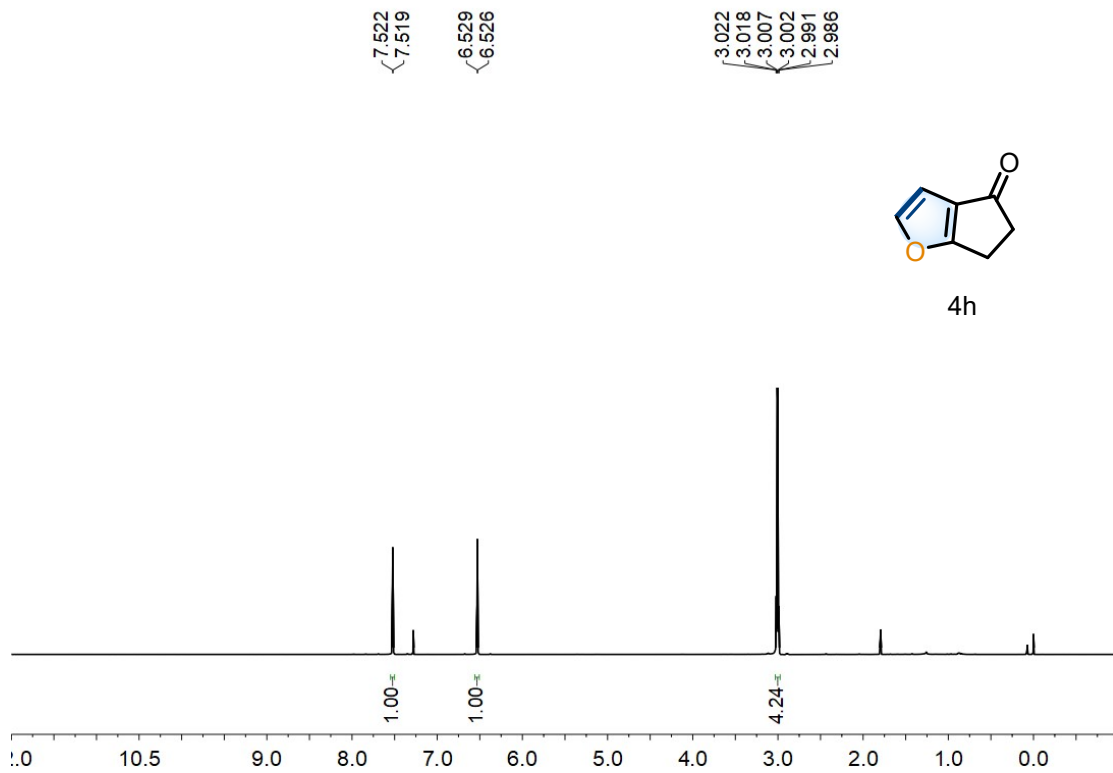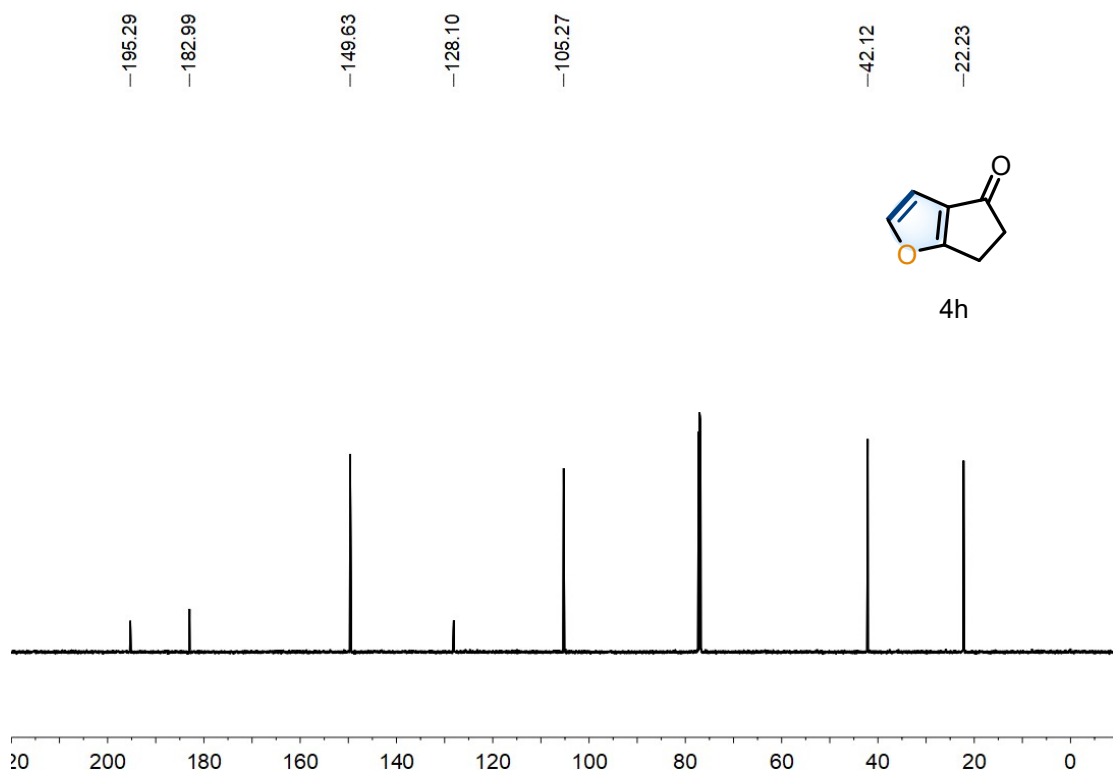

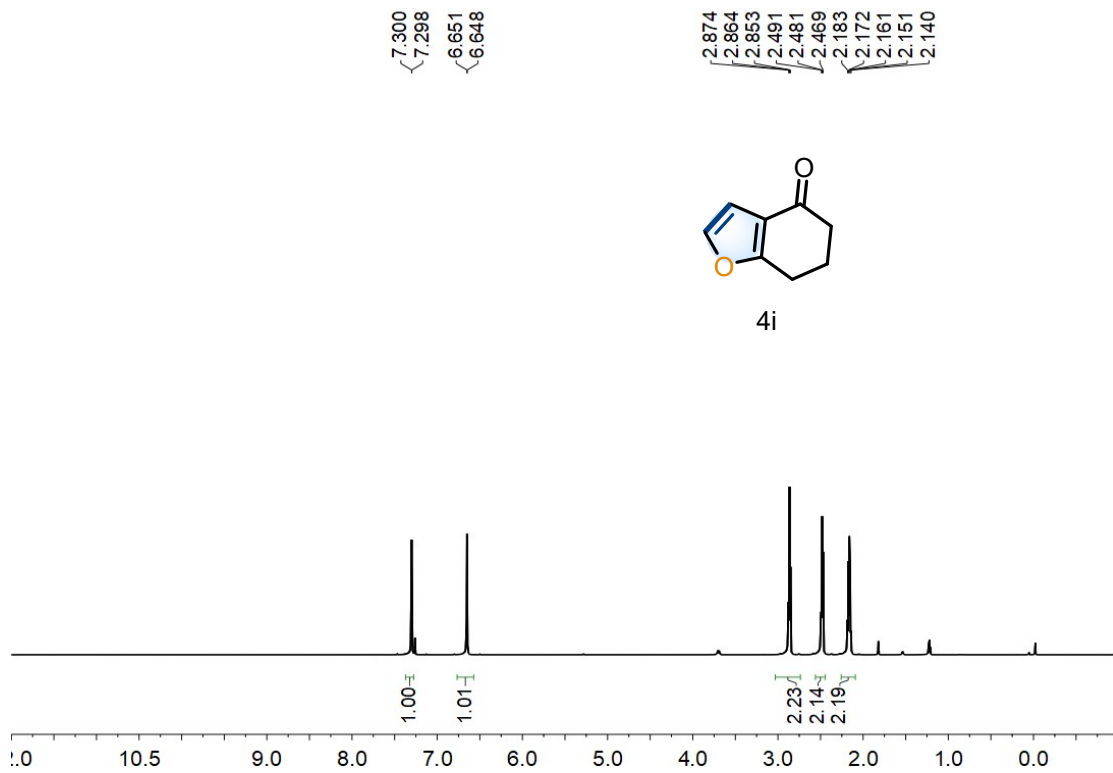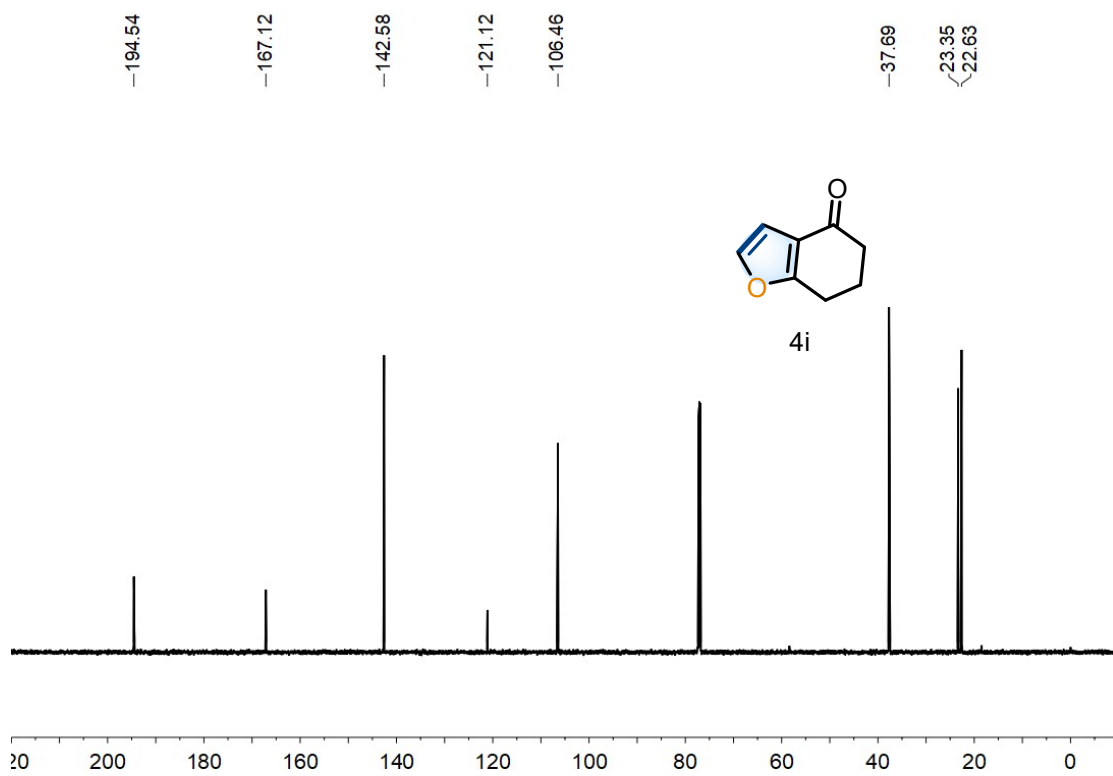

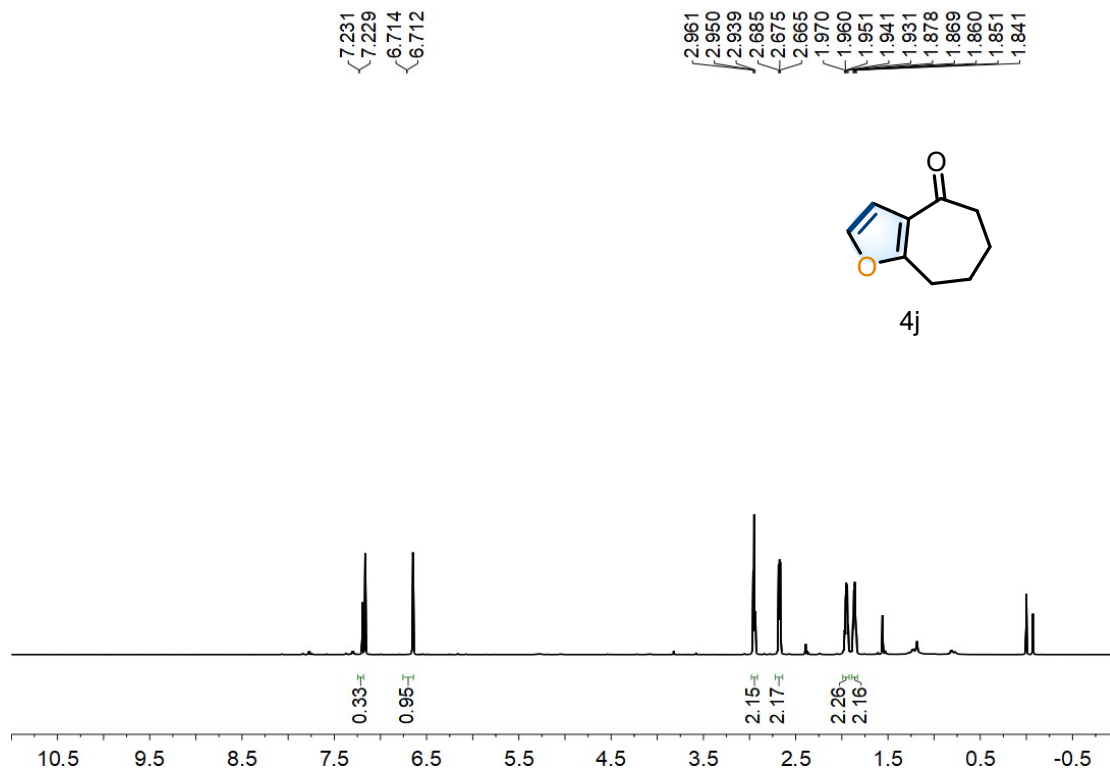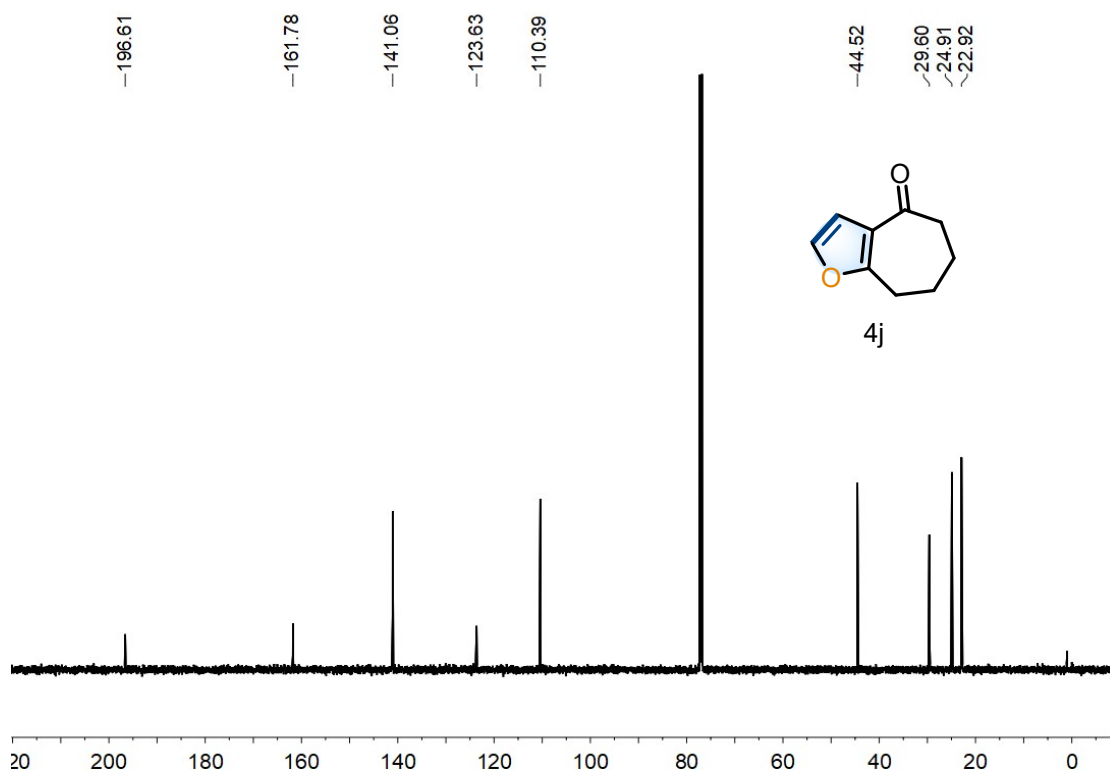

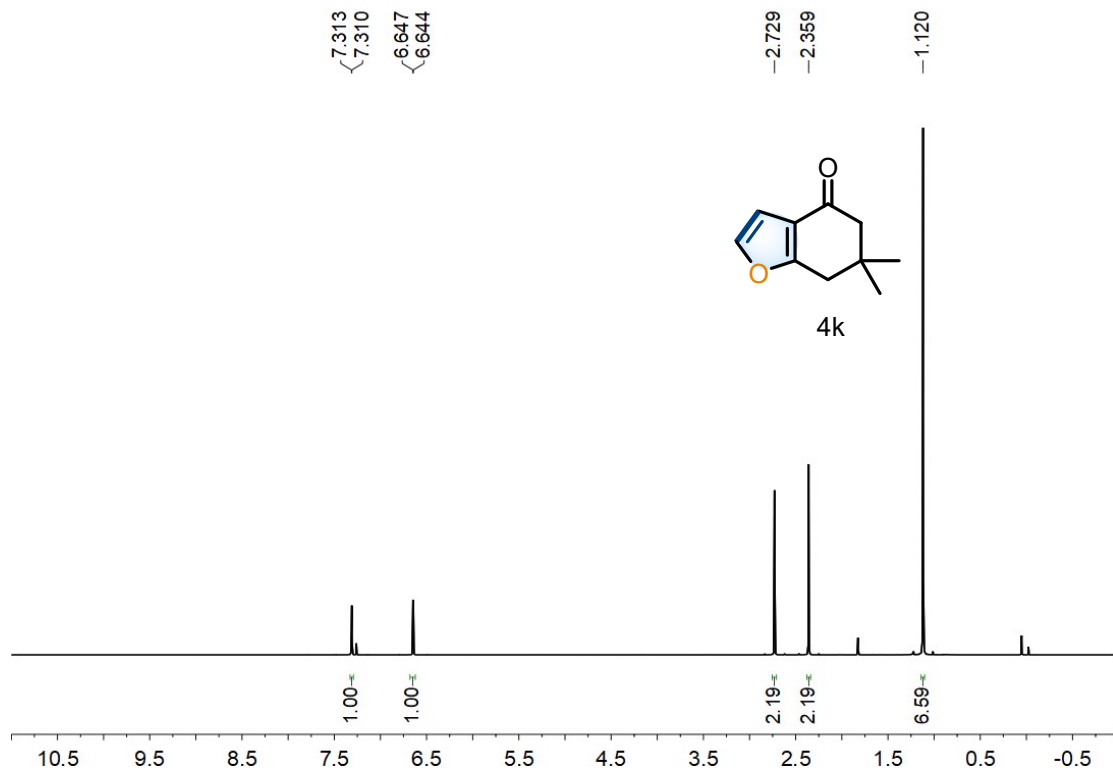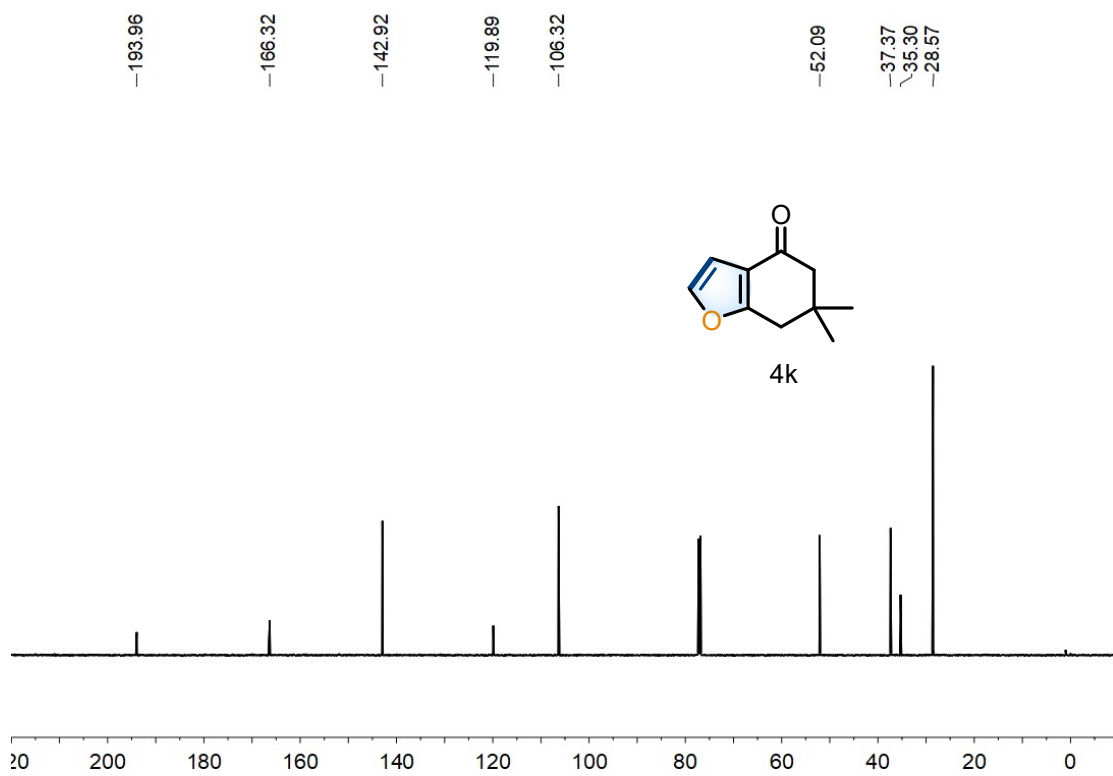



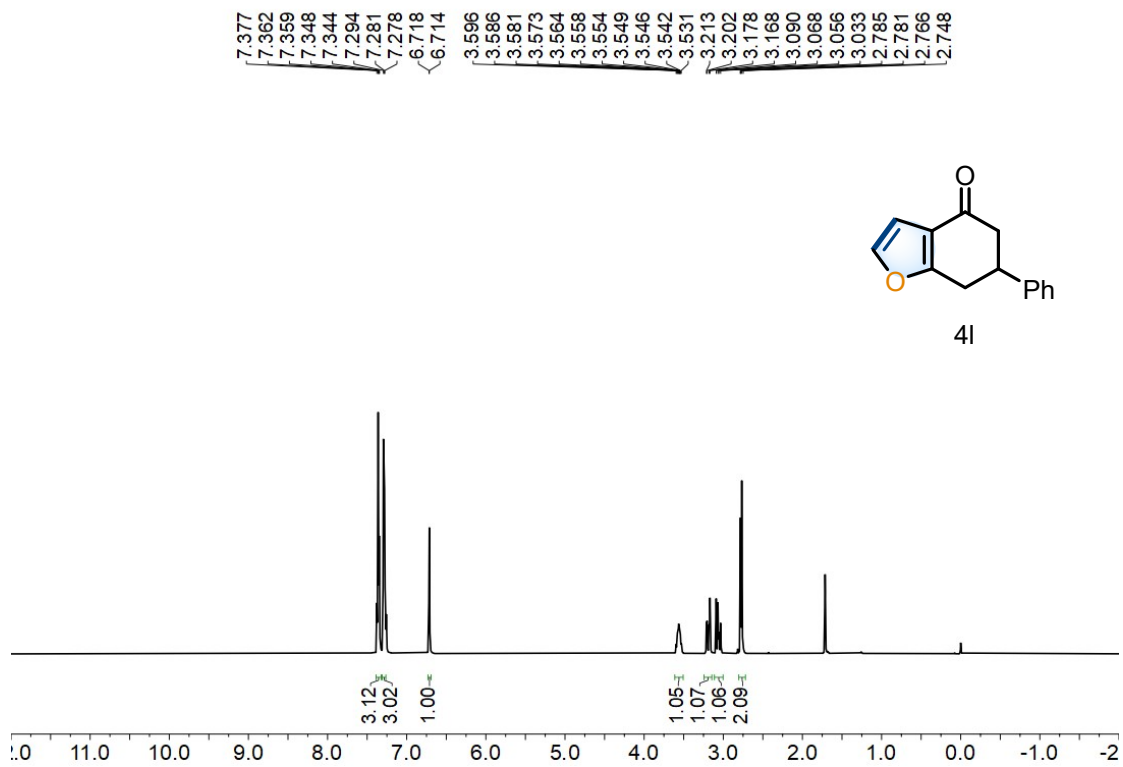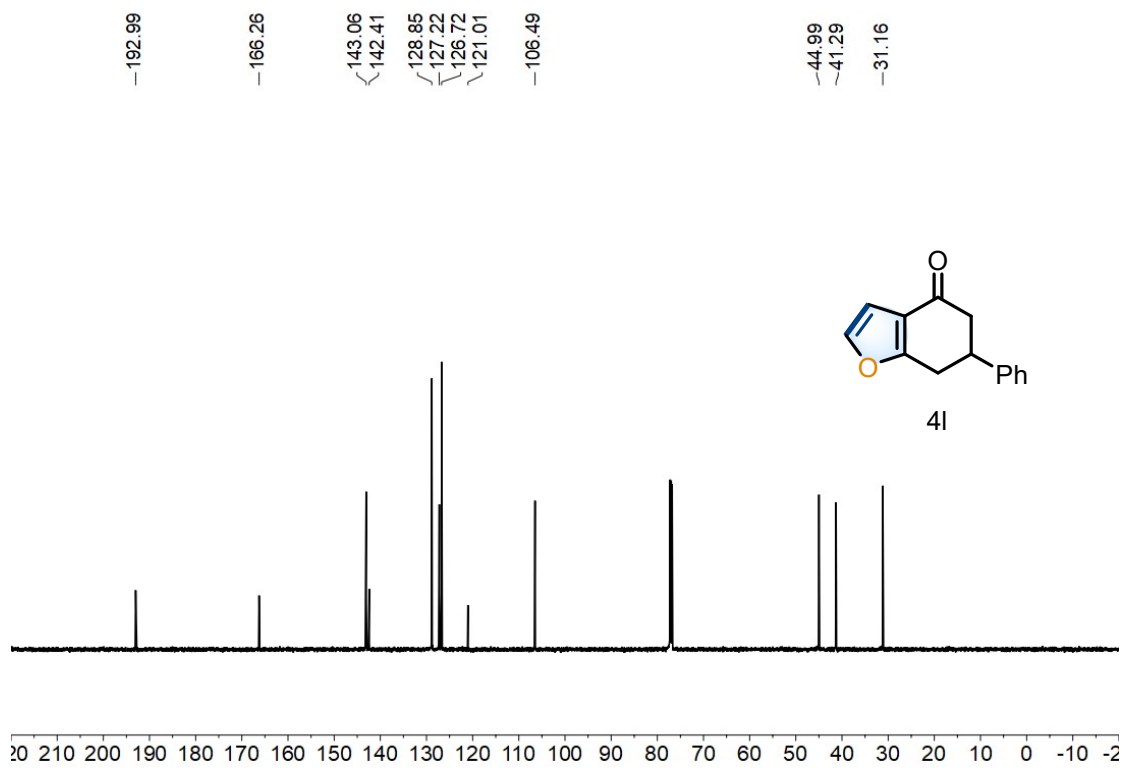

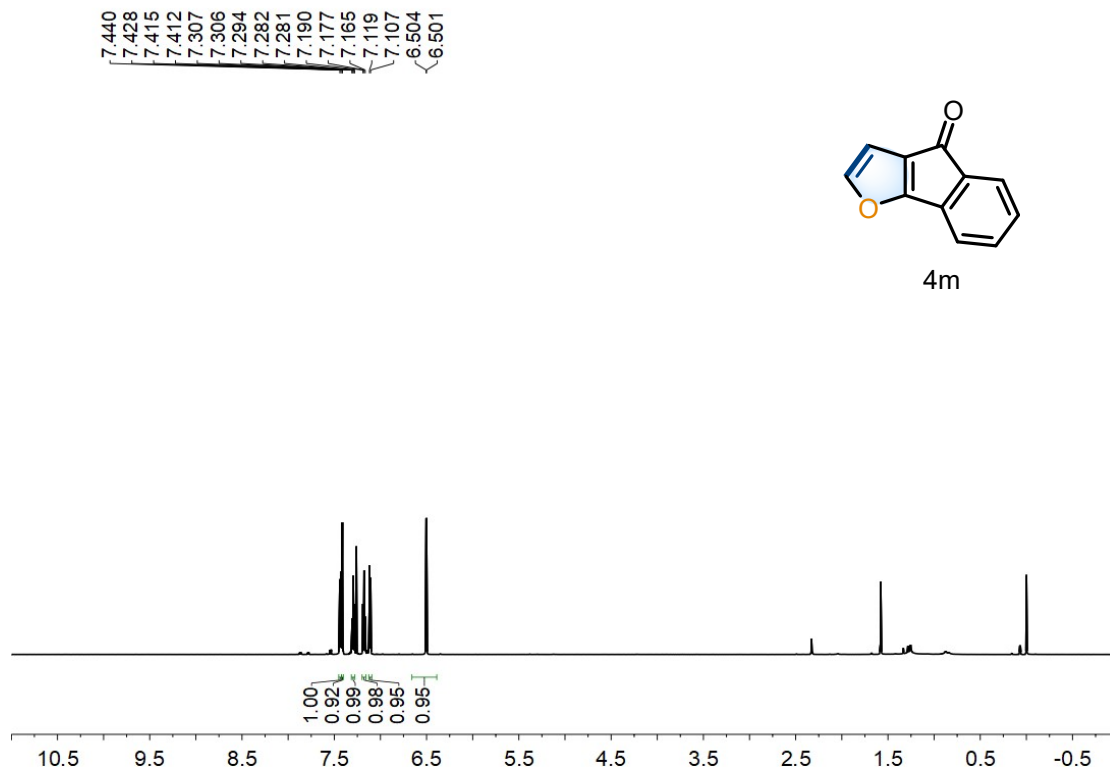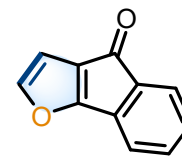

4m

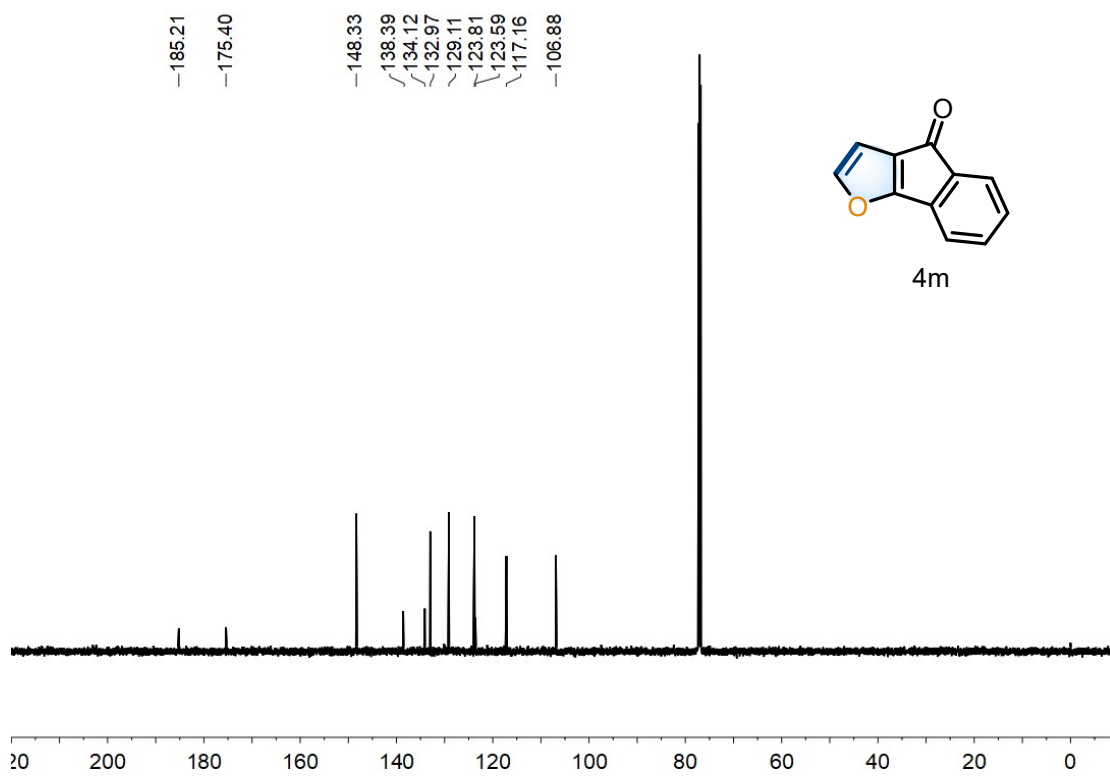

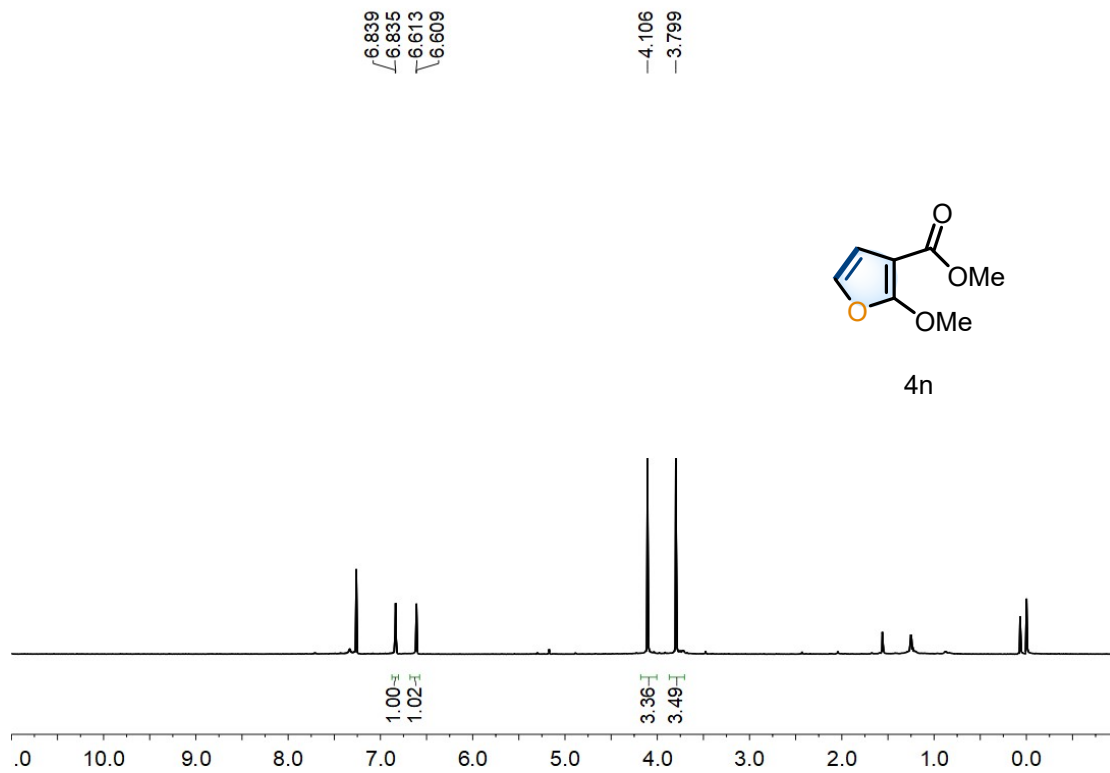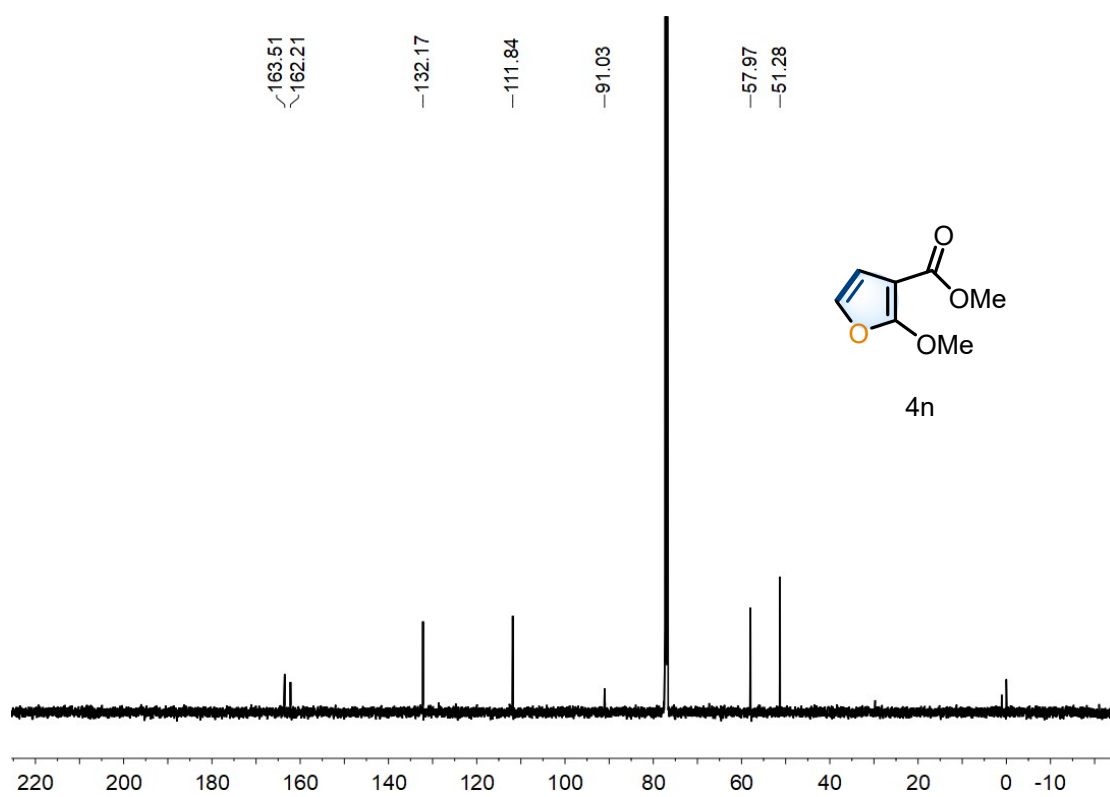

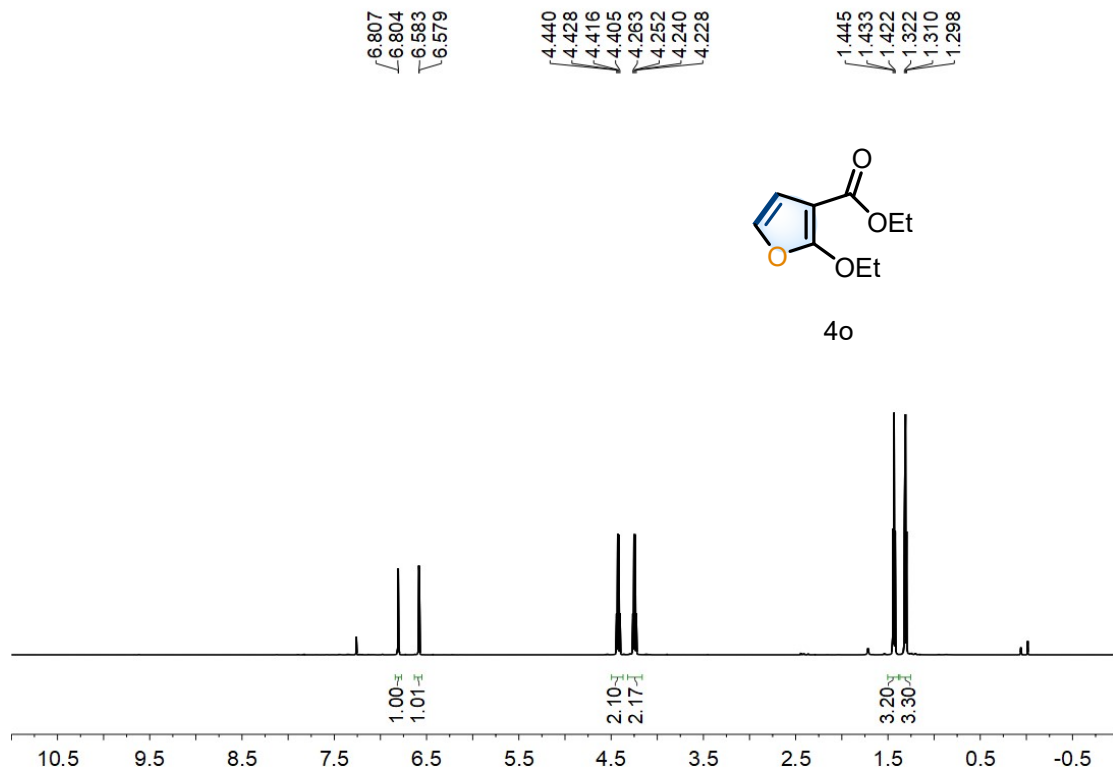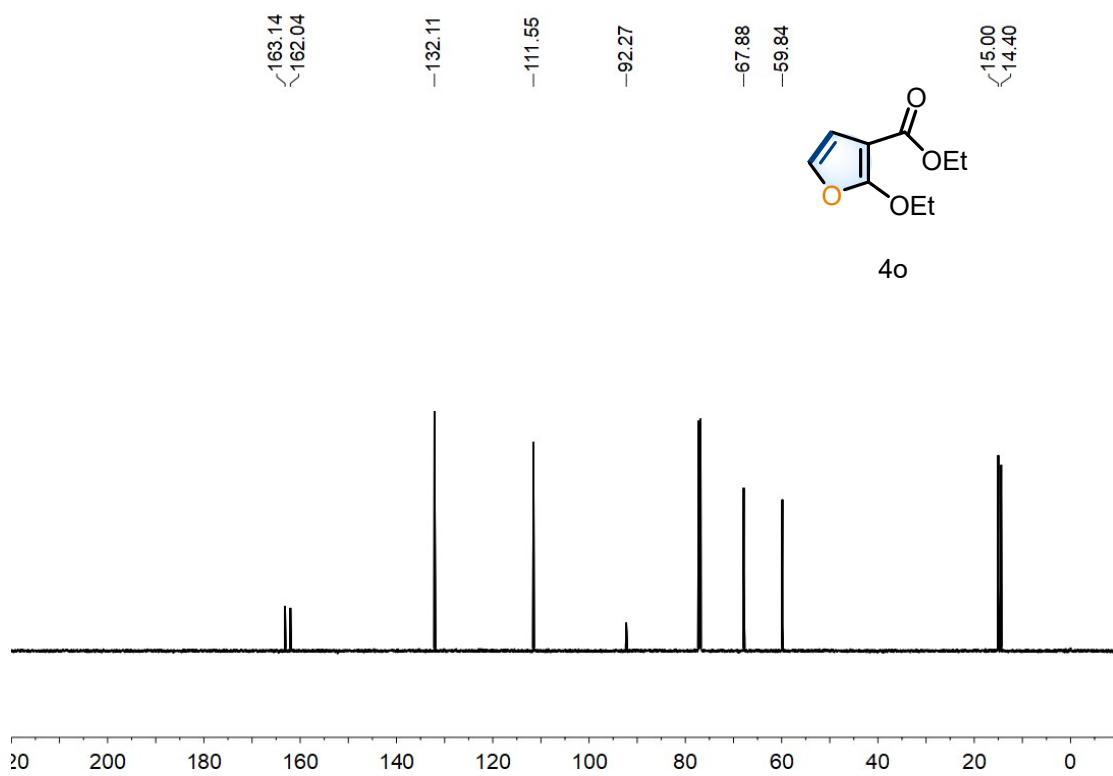

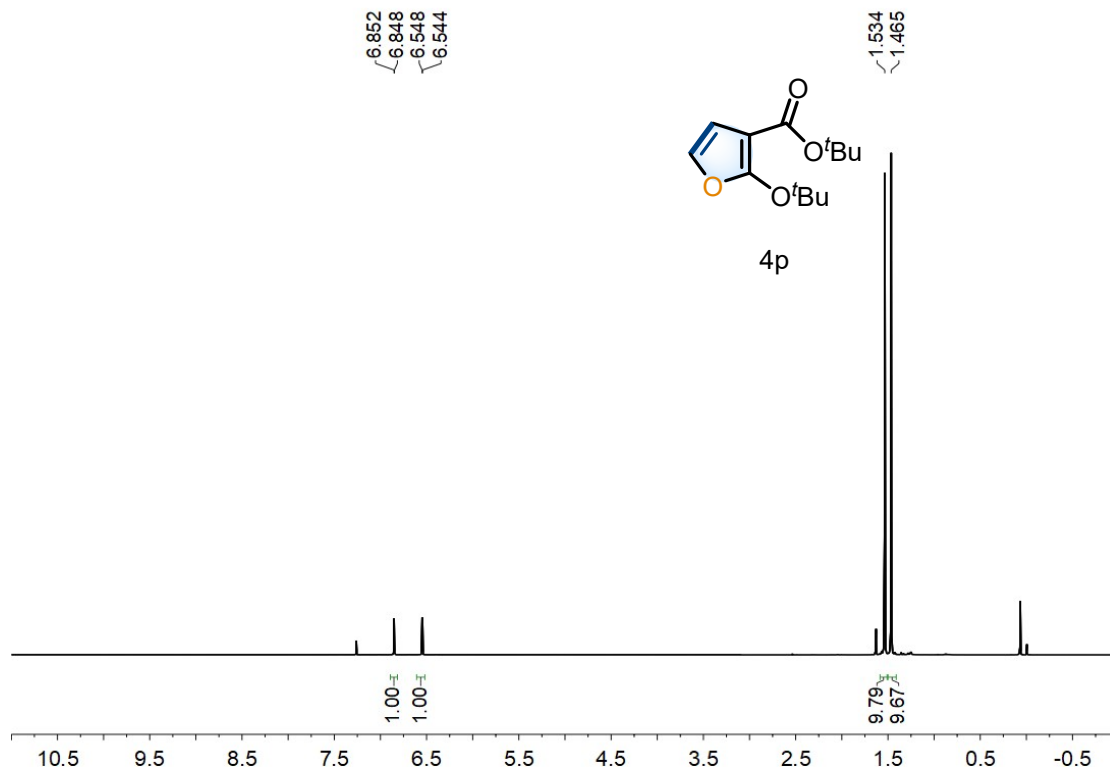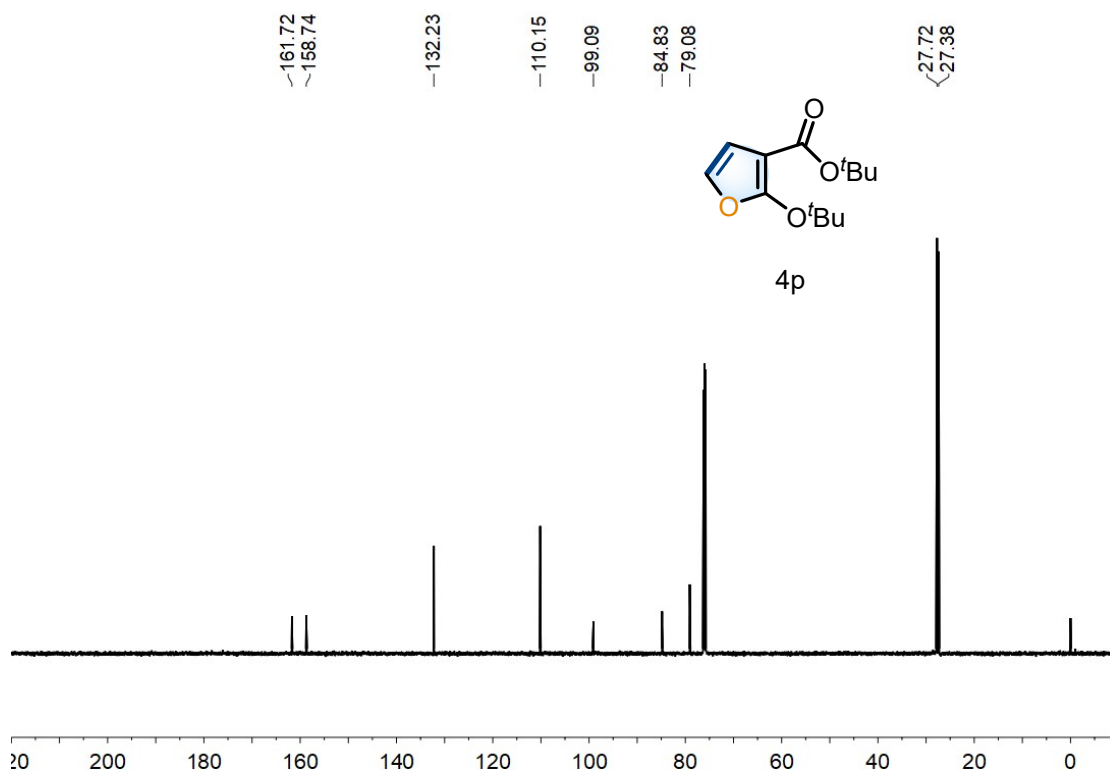

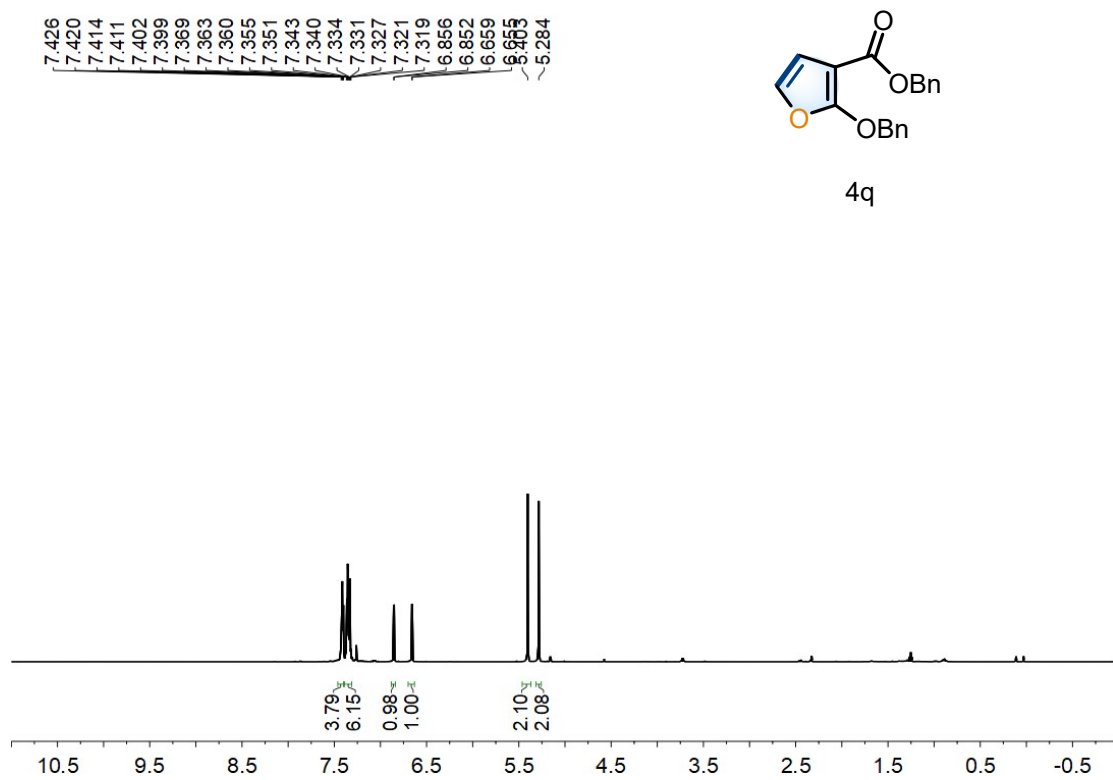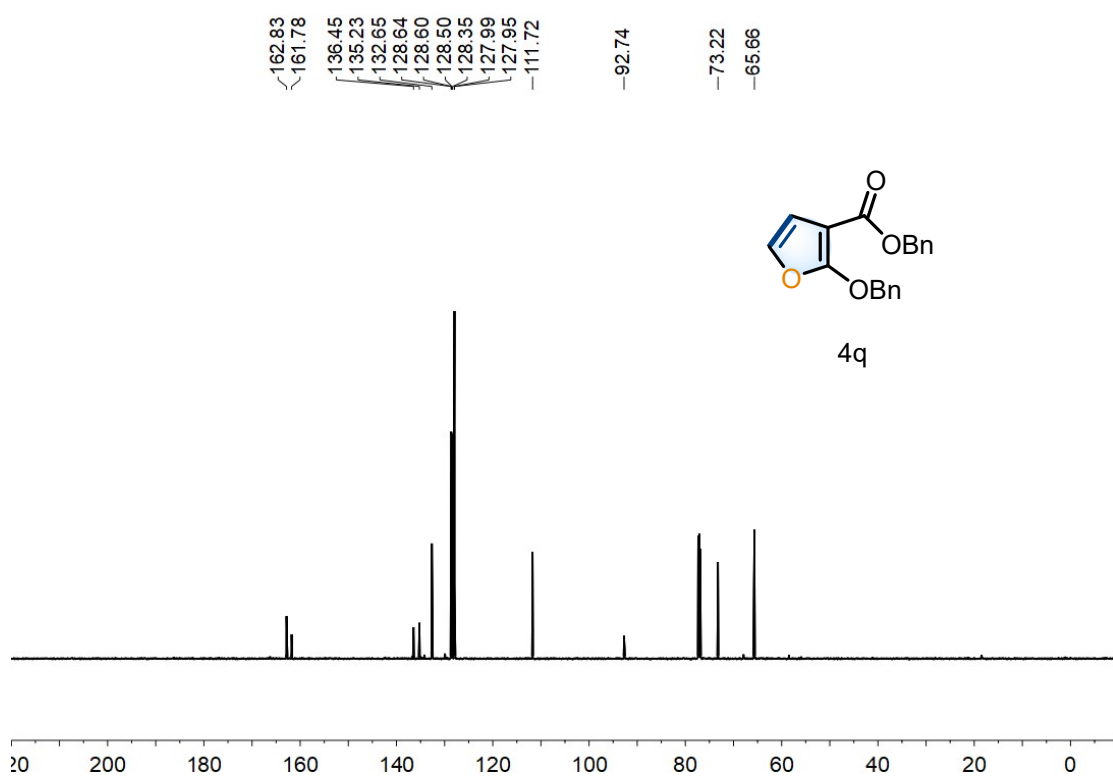

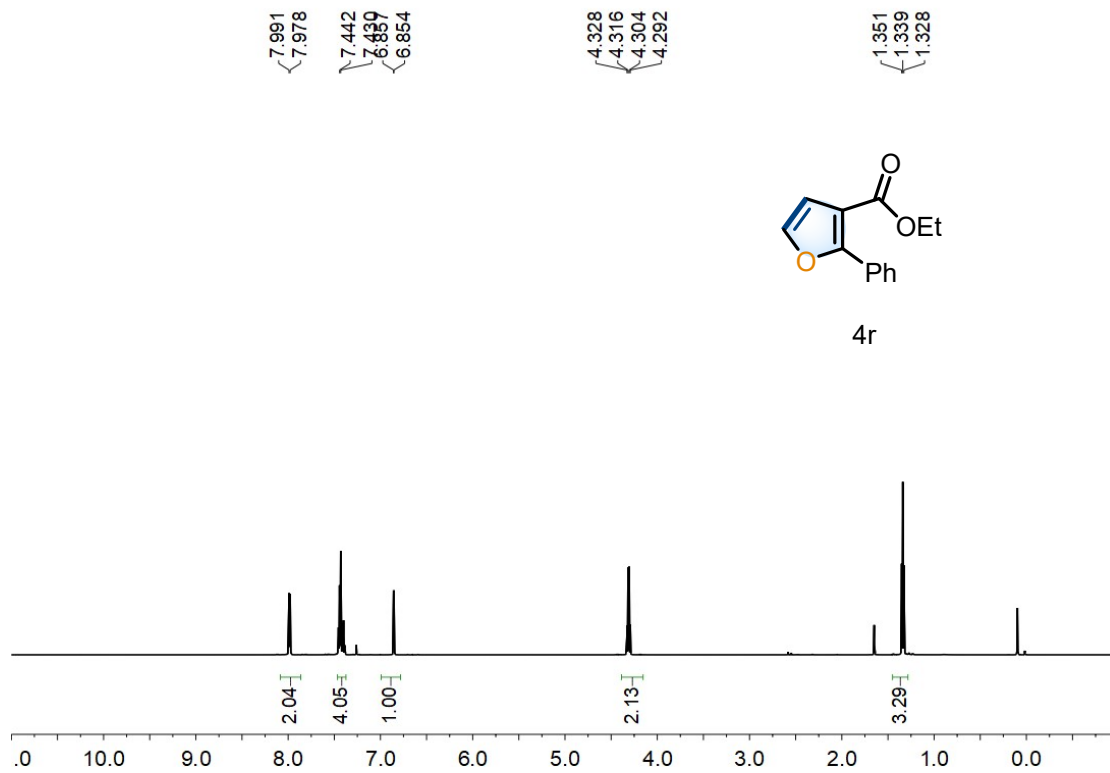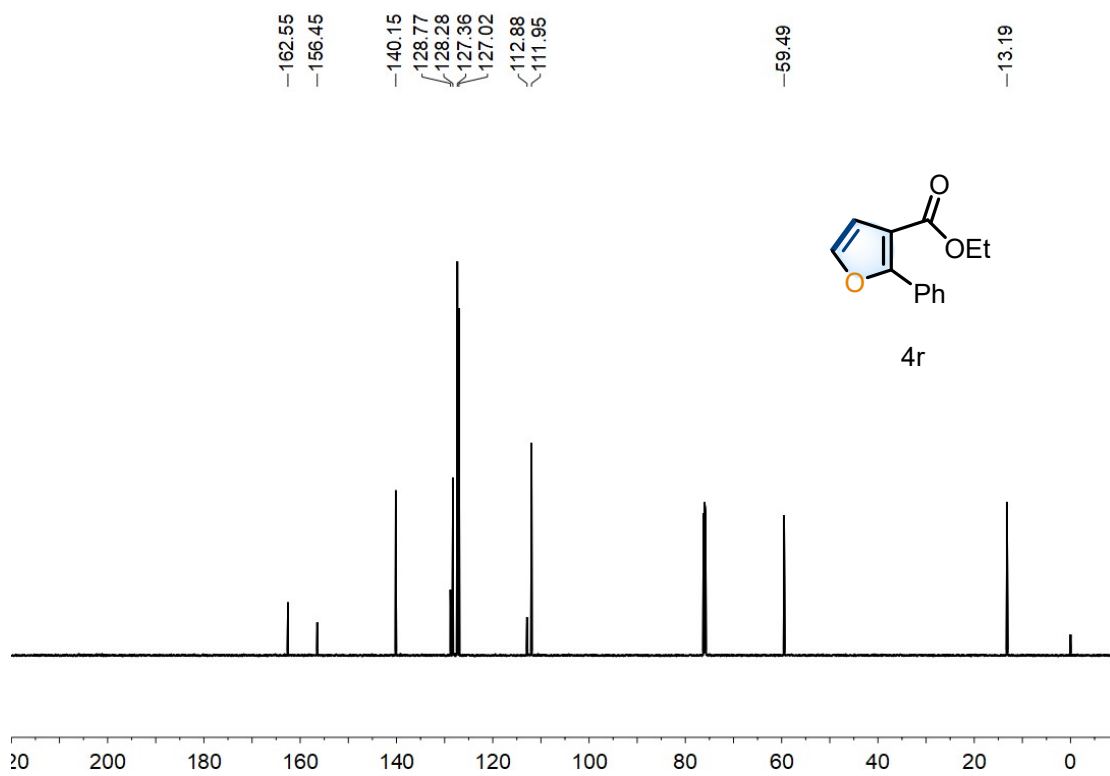

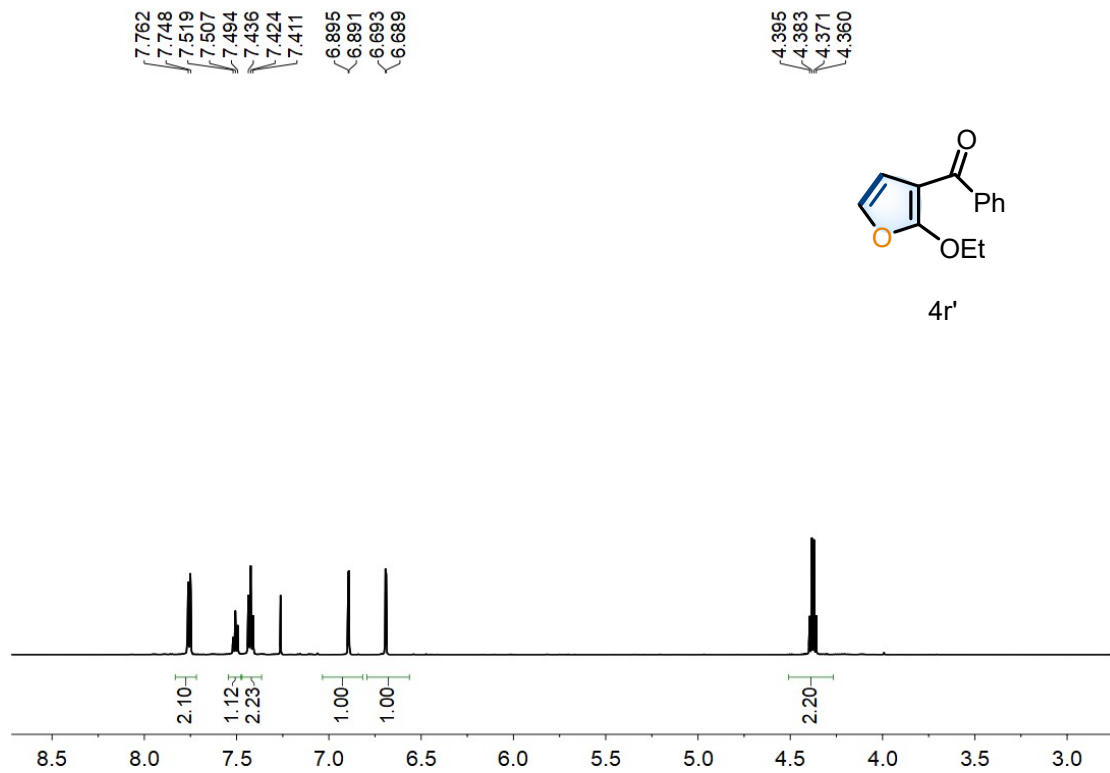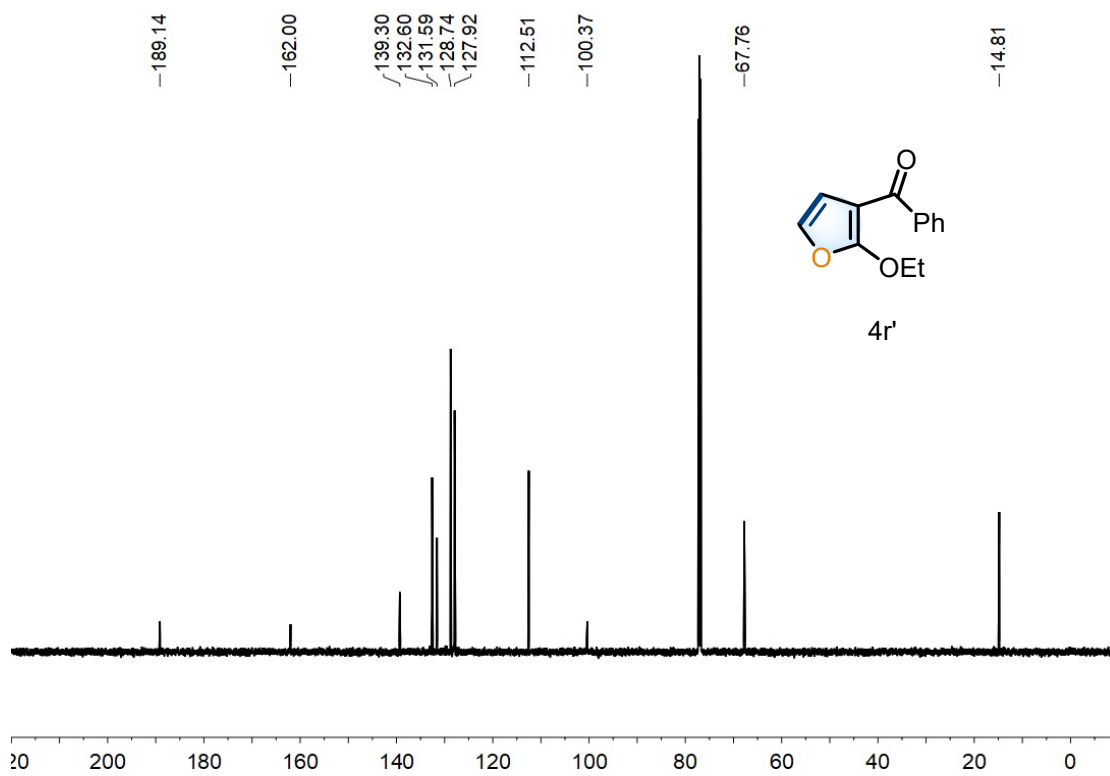



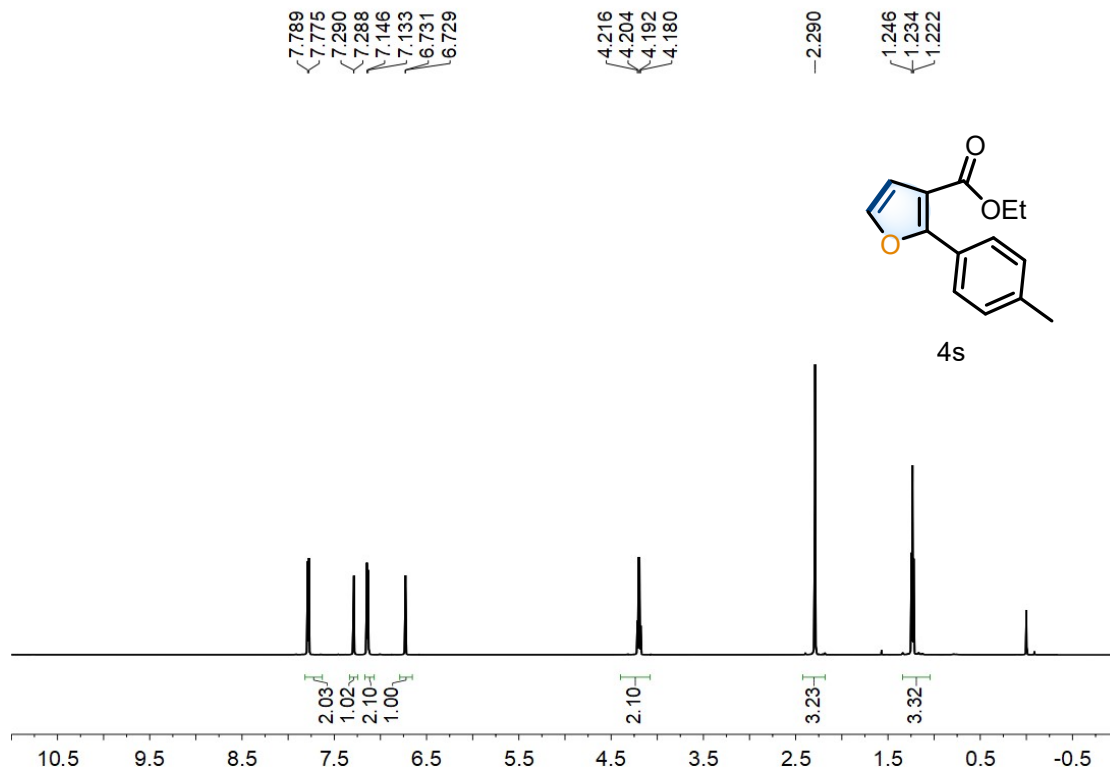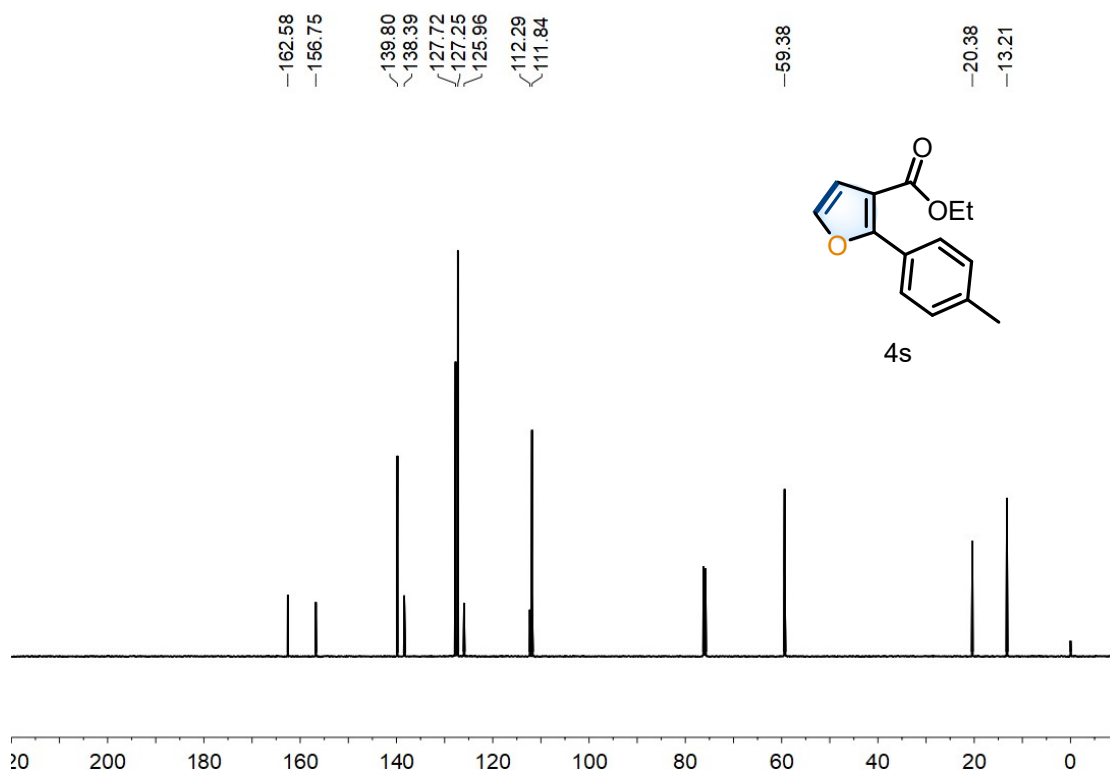

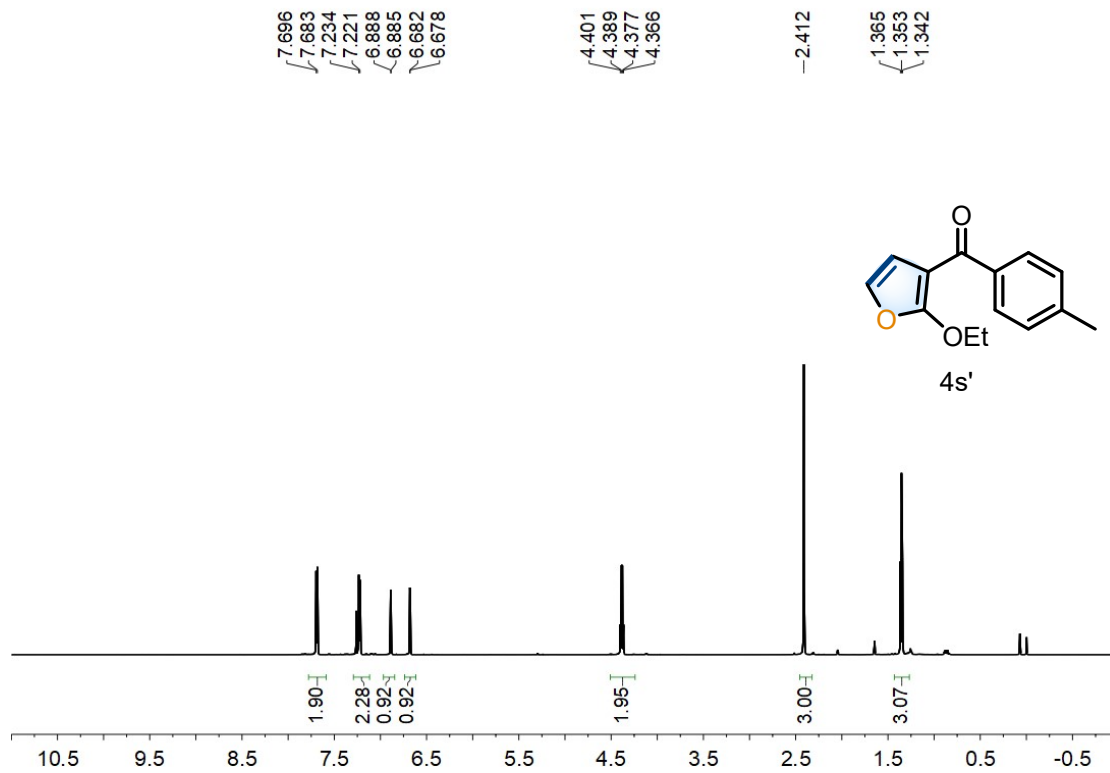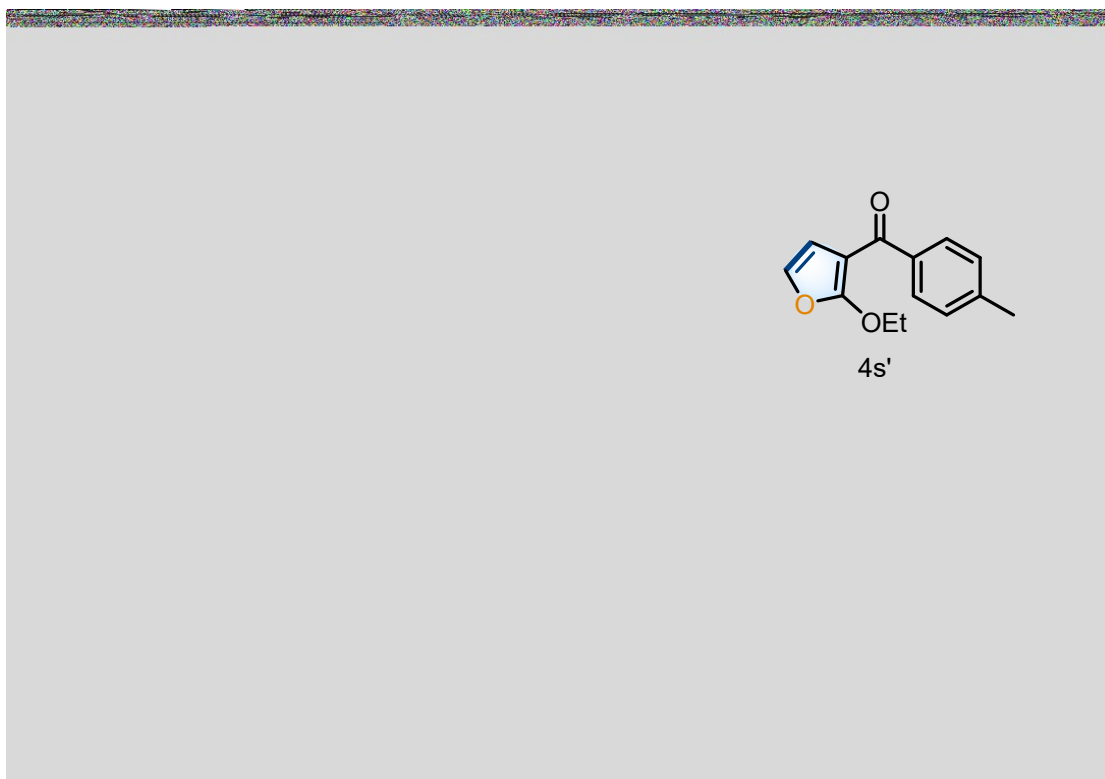

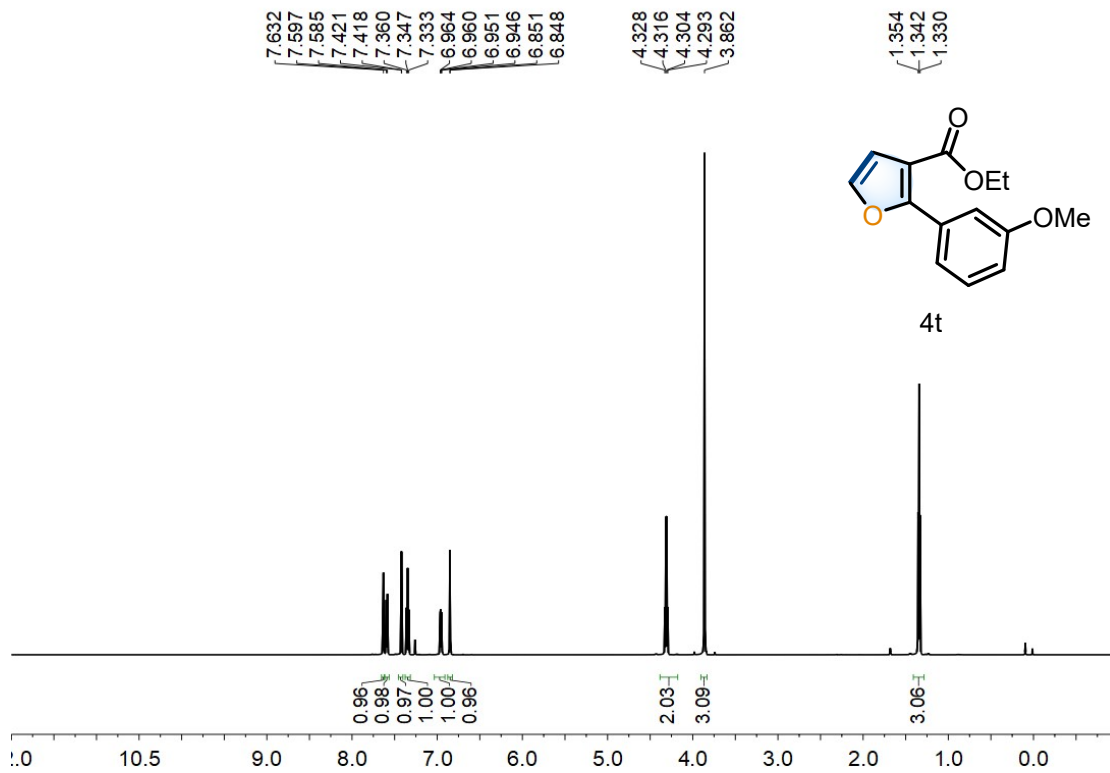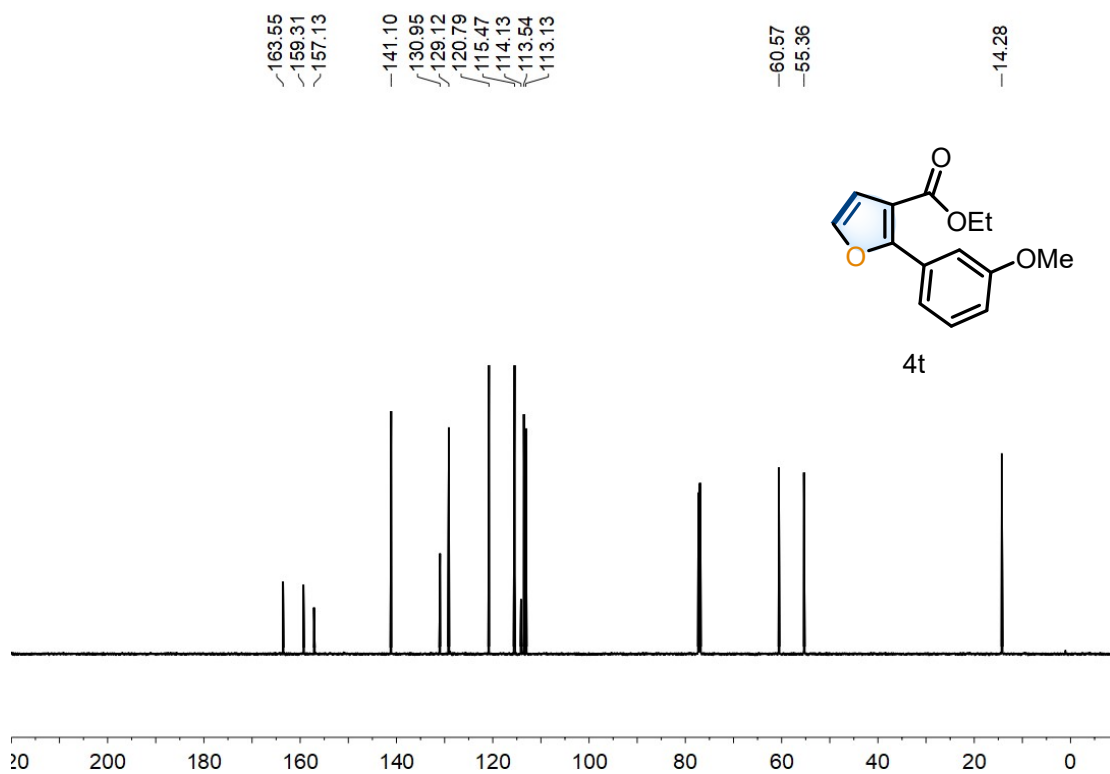

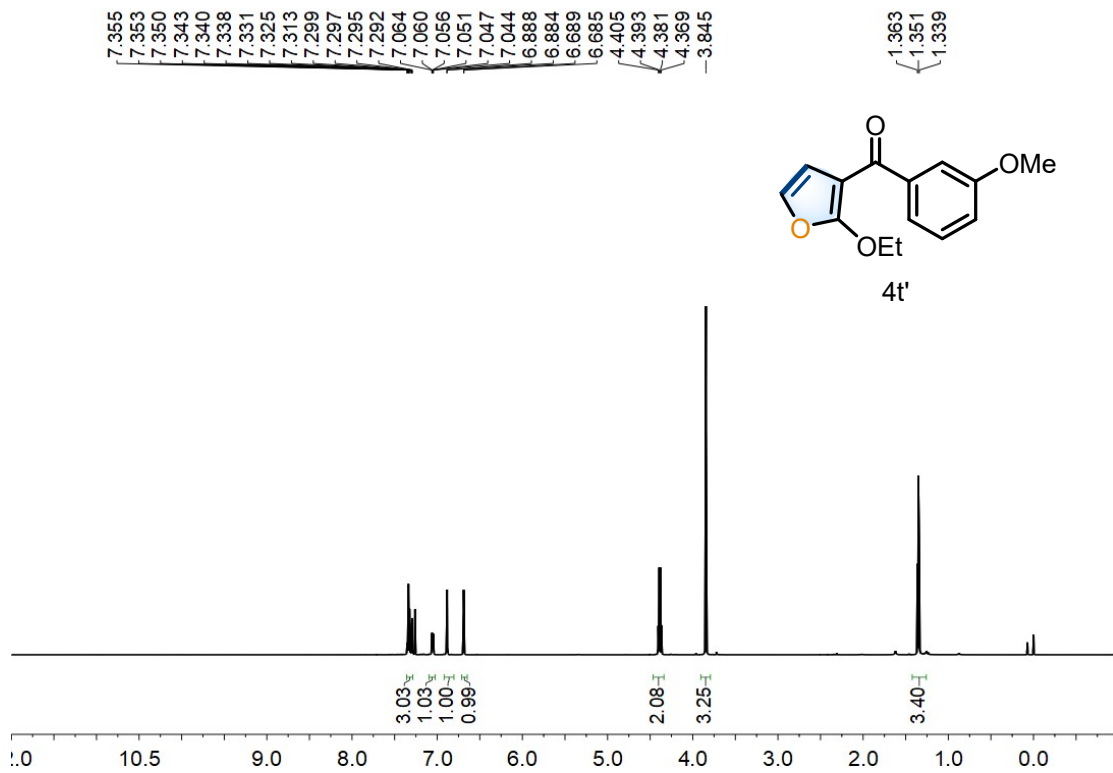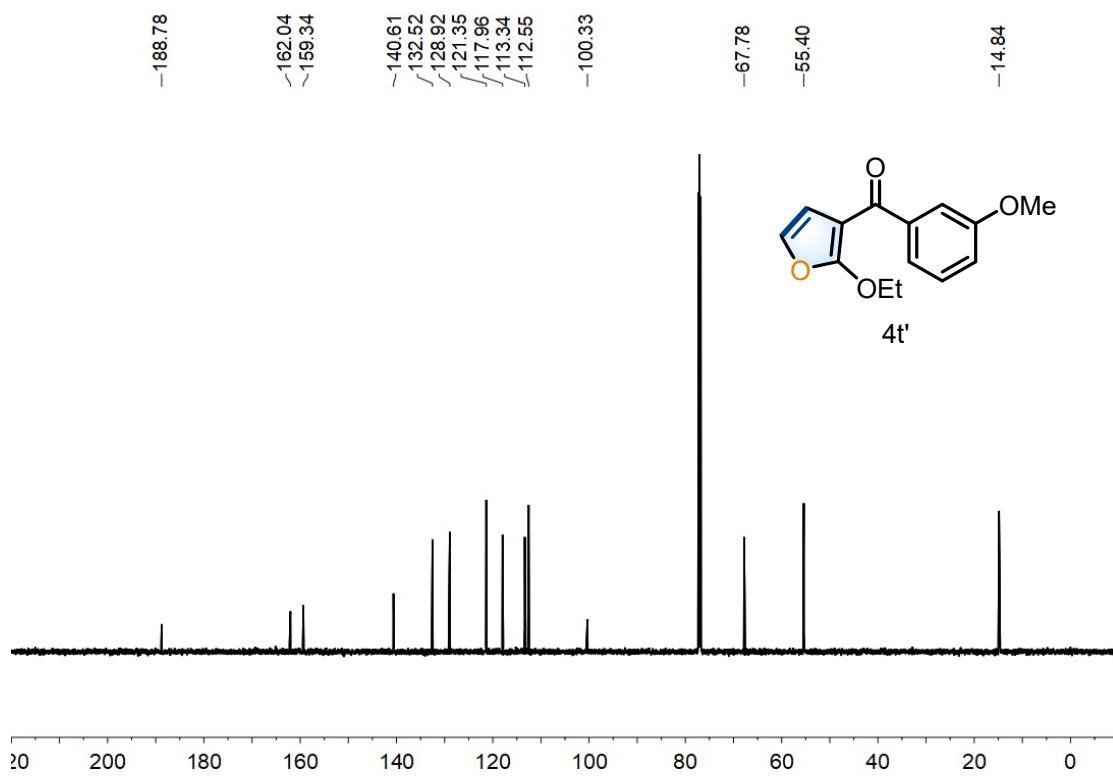

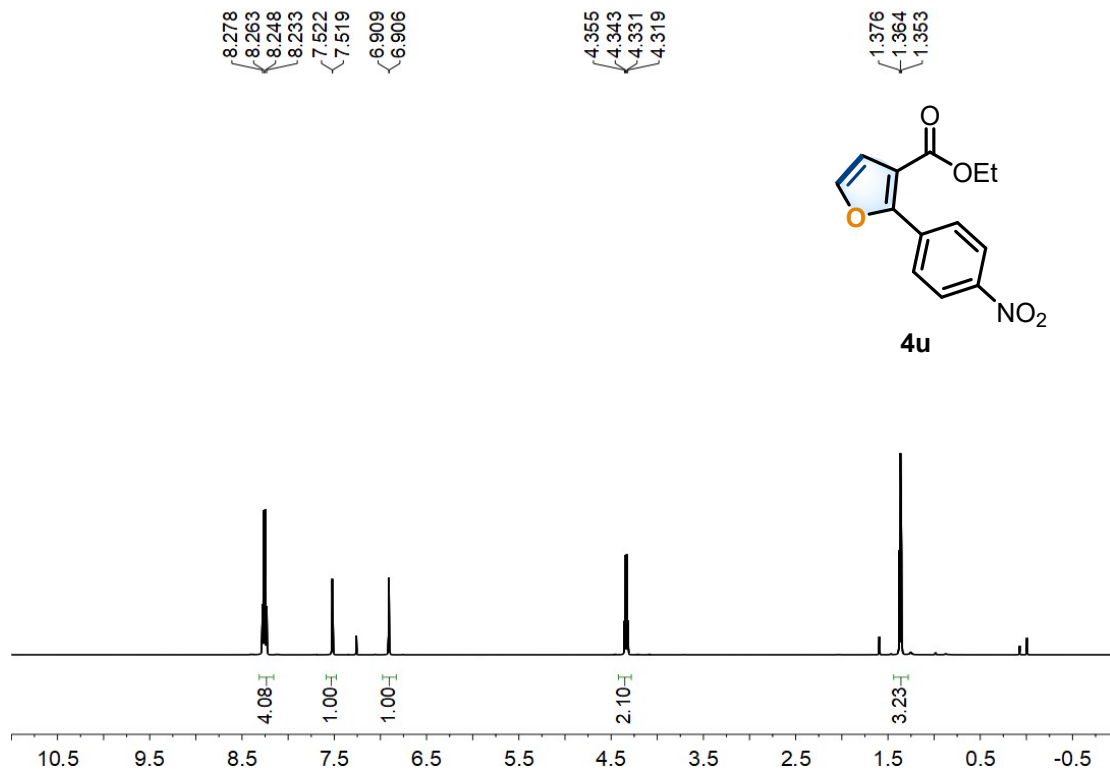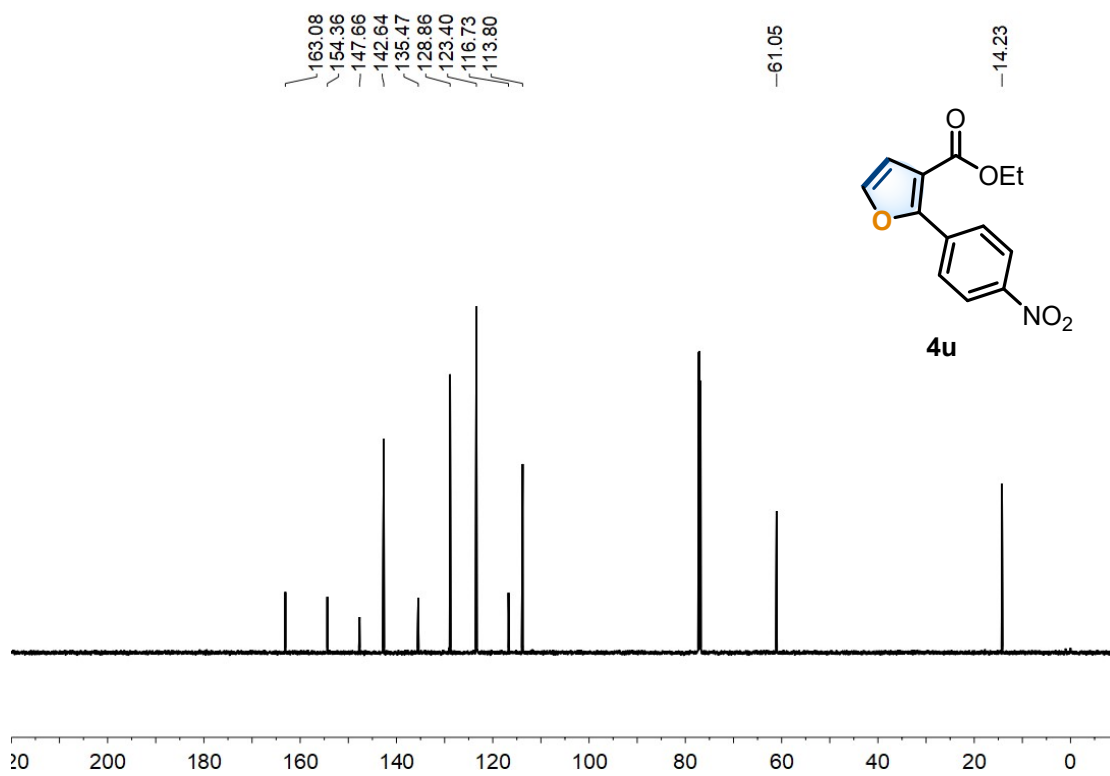

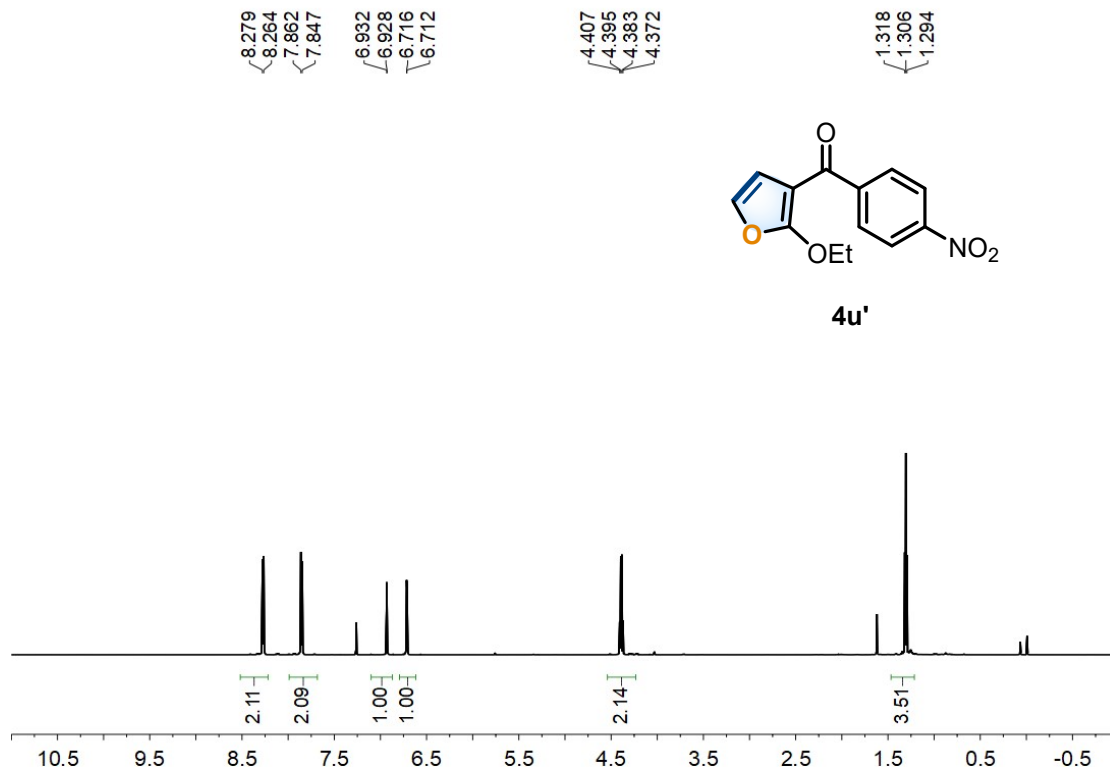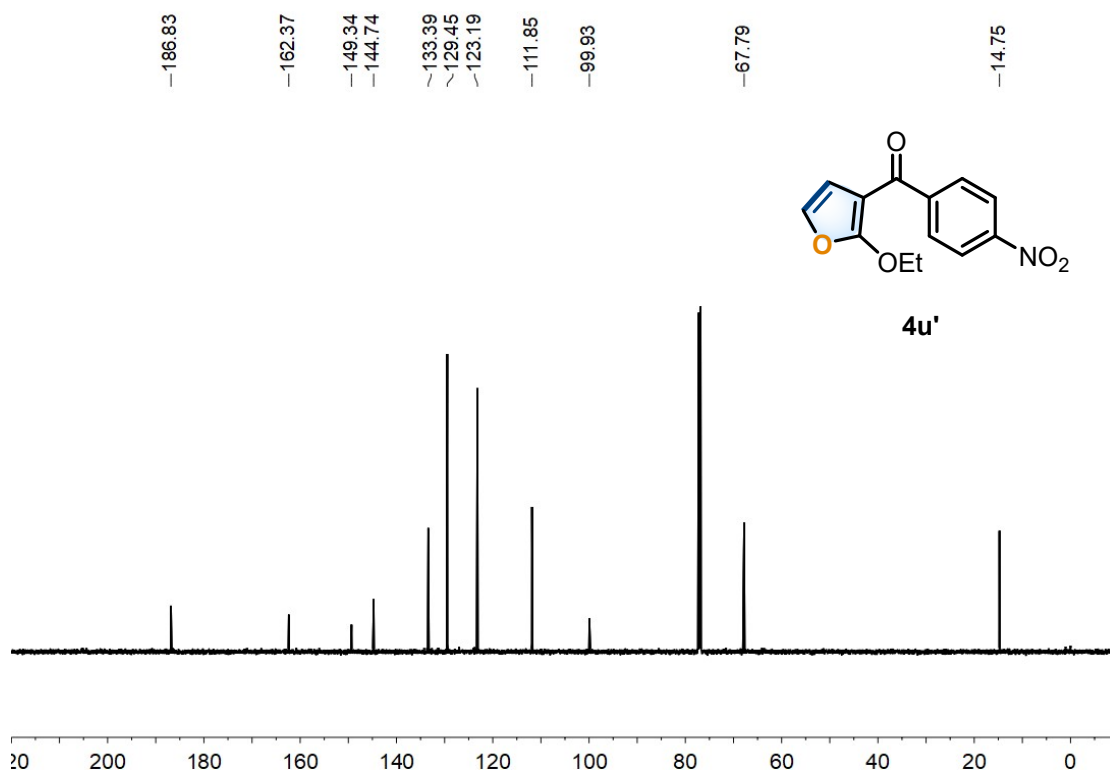

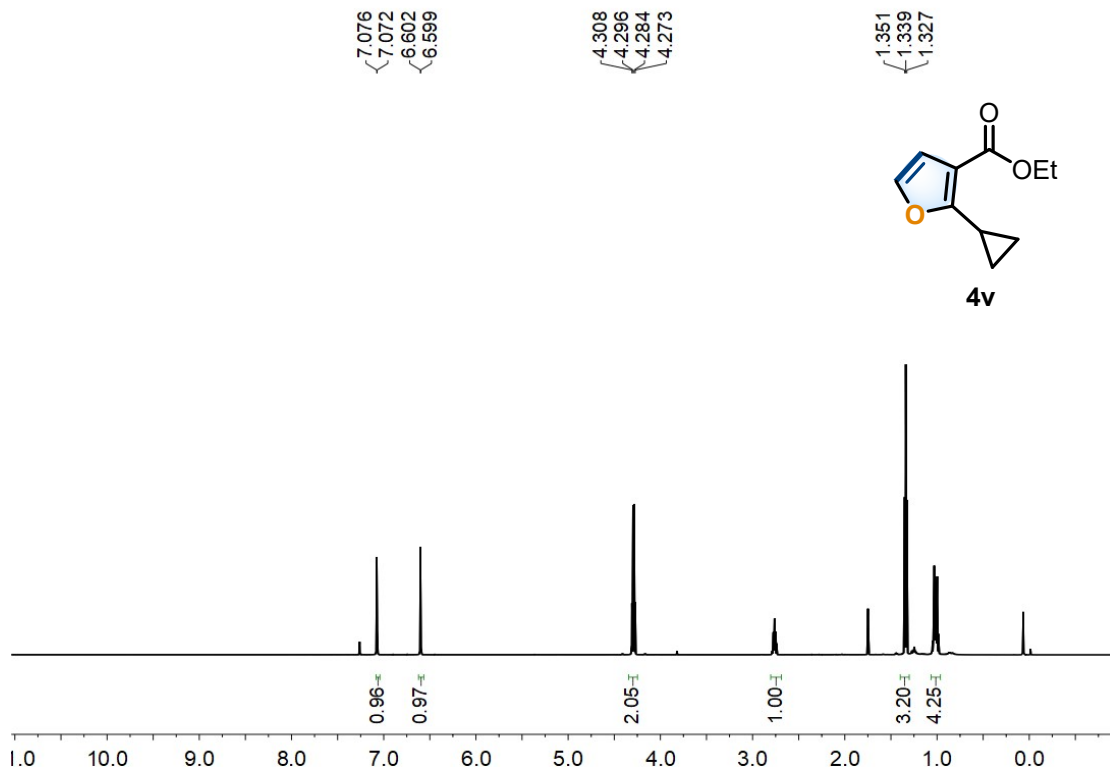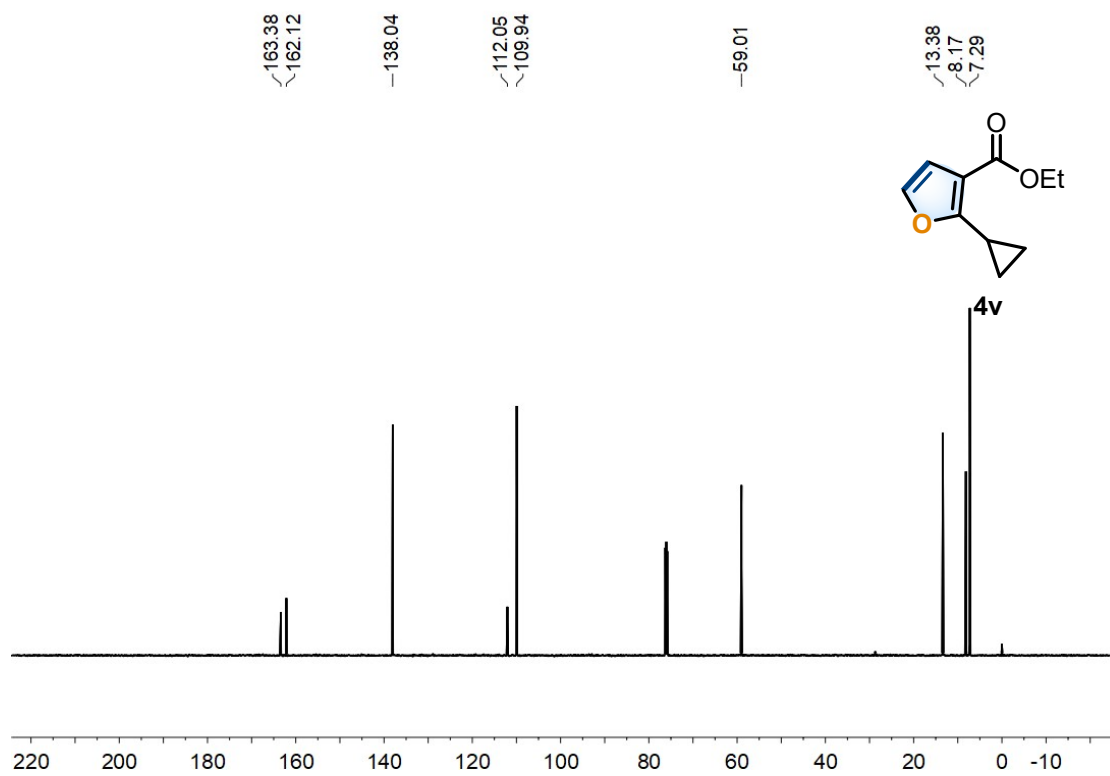

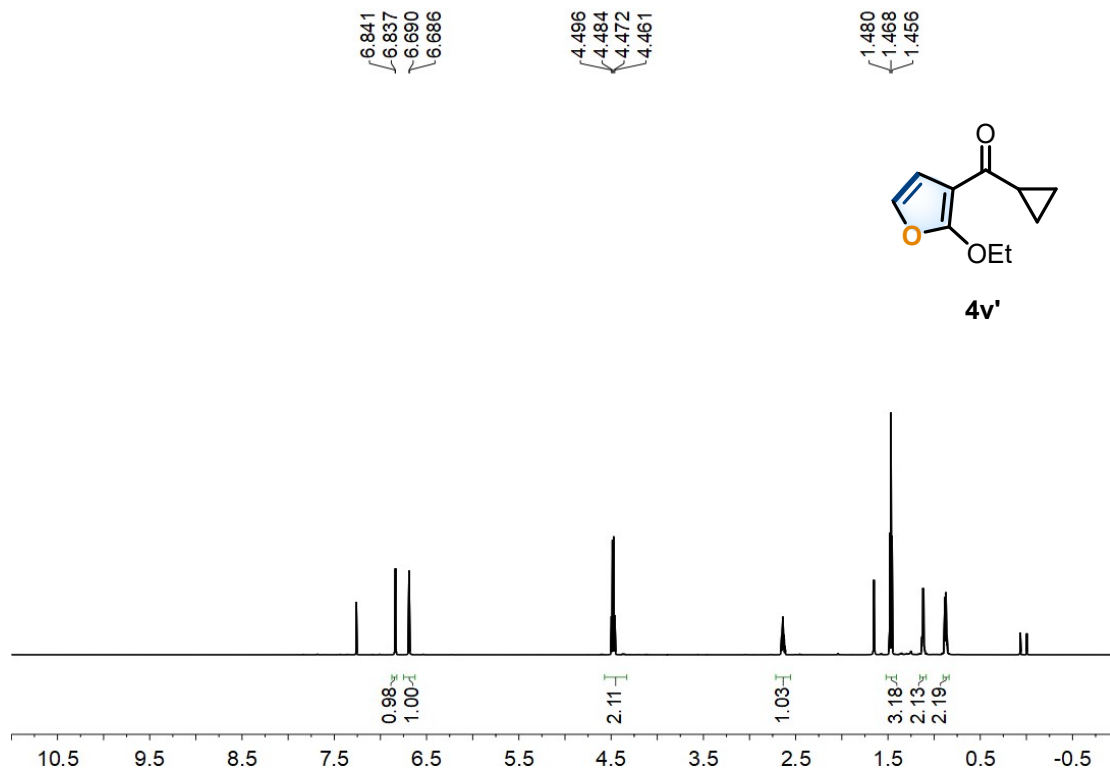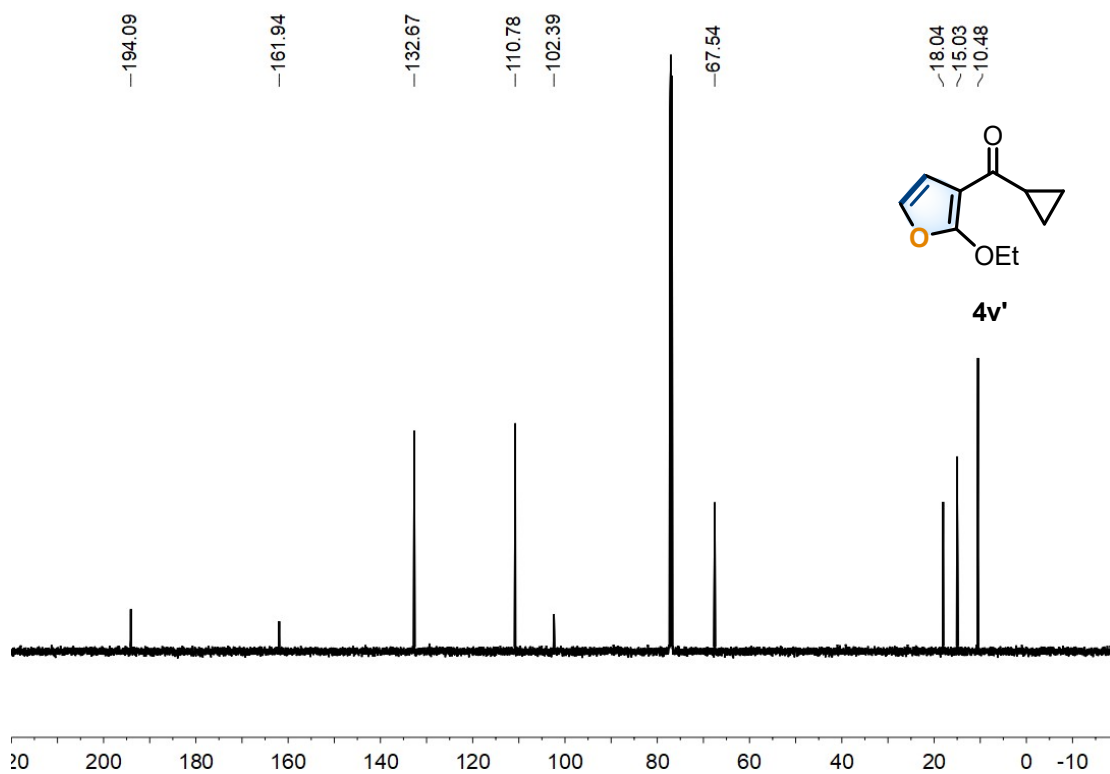



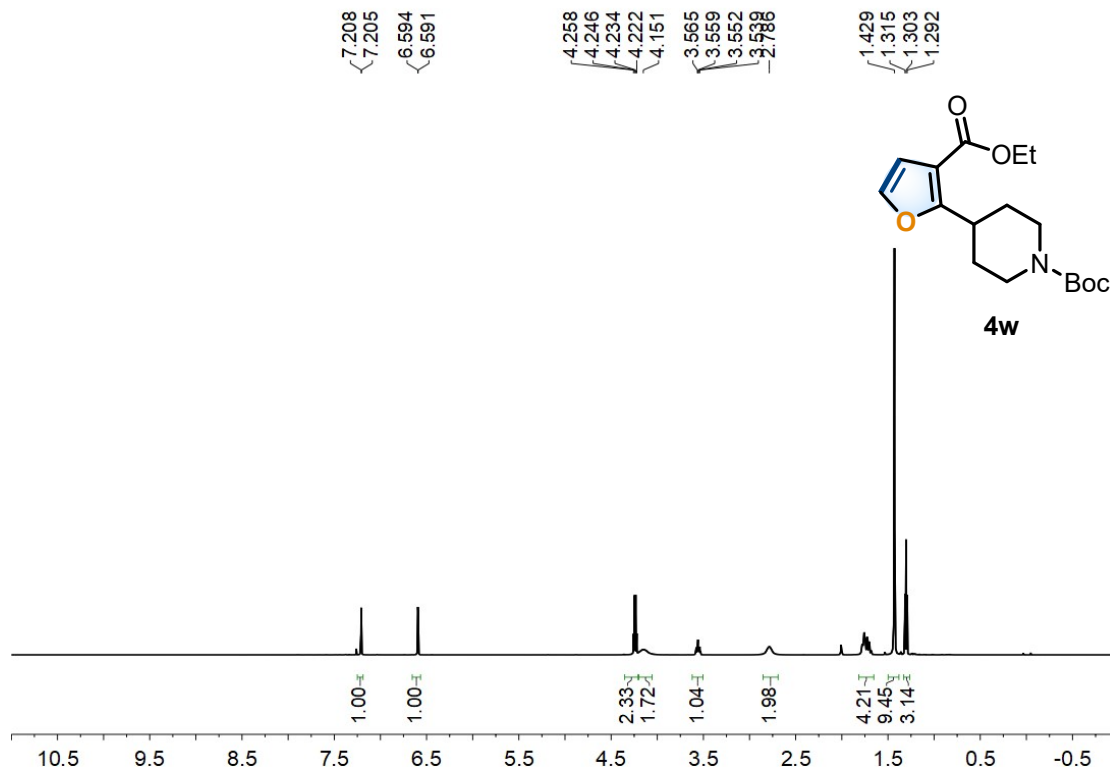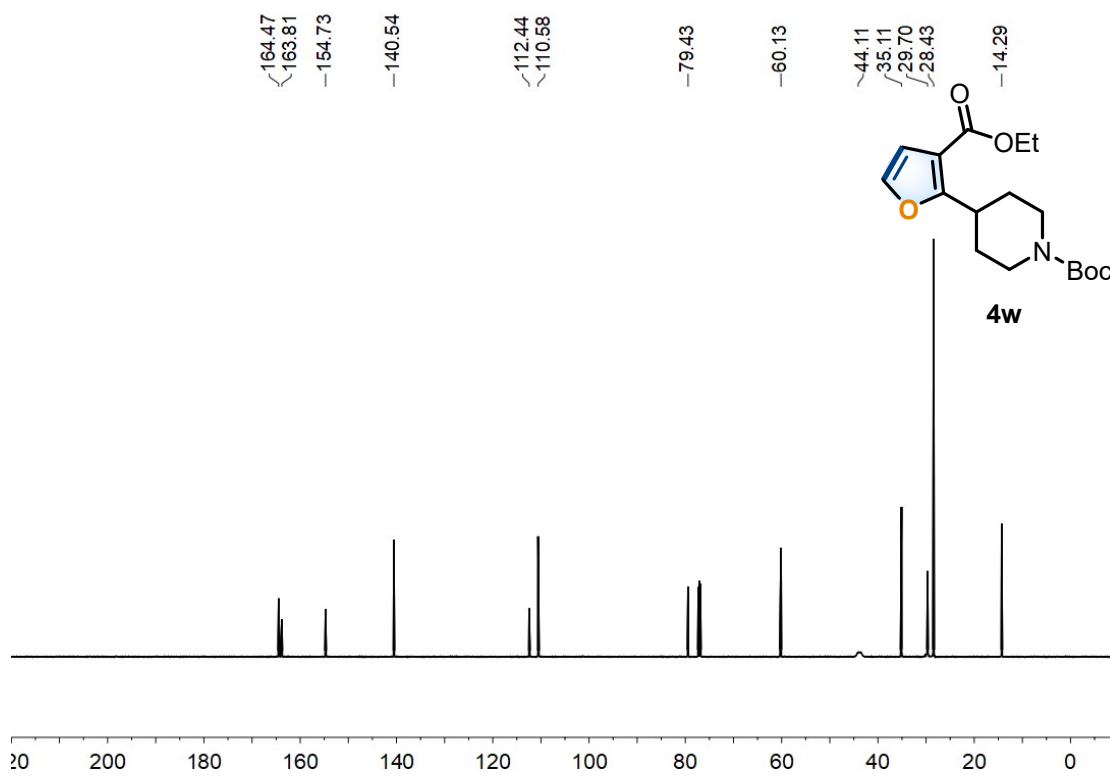

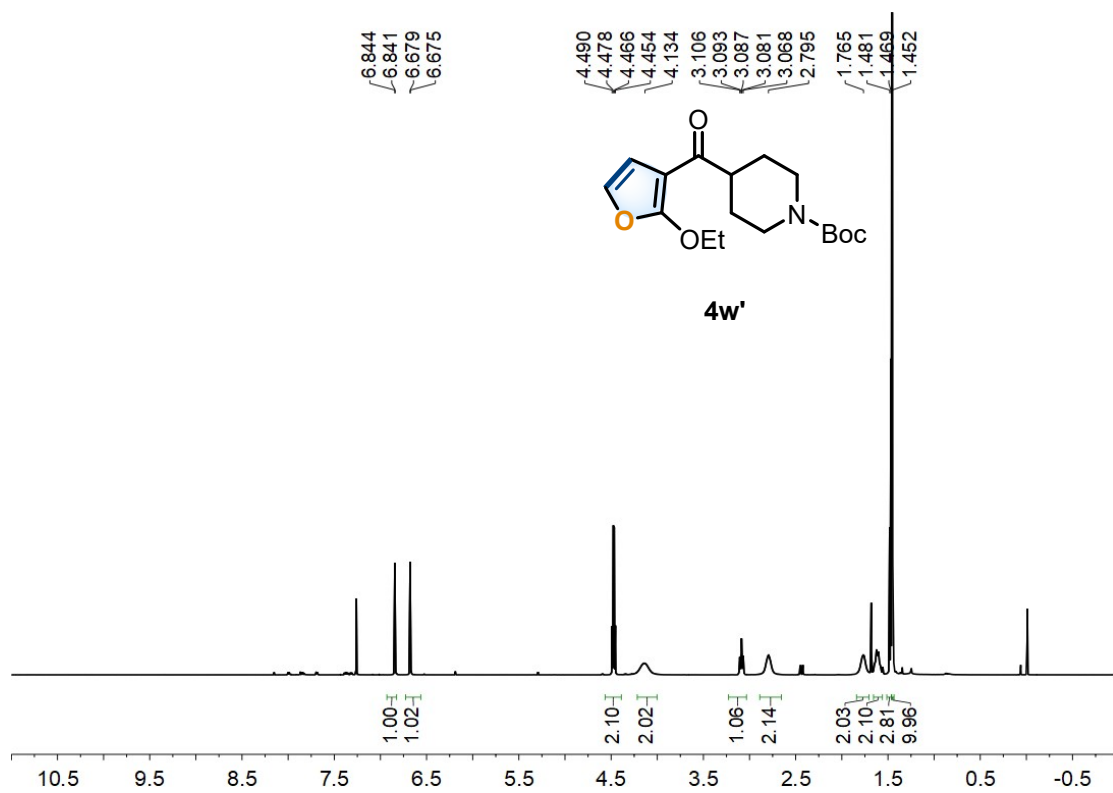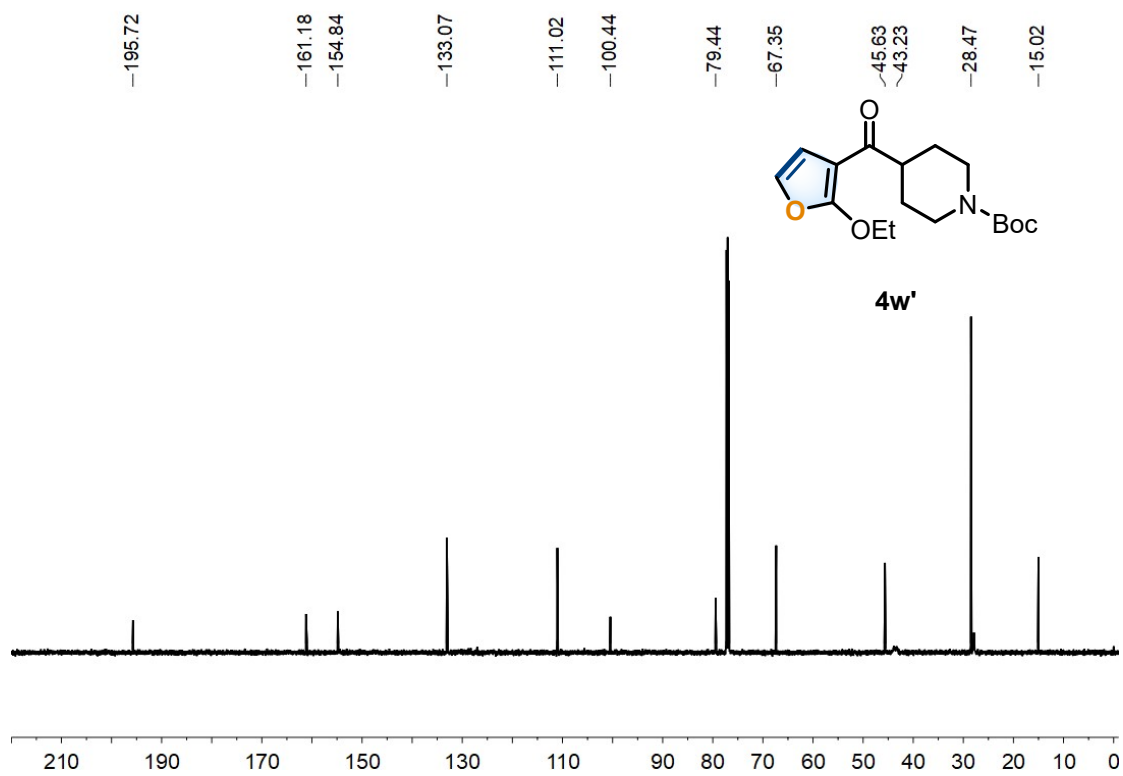

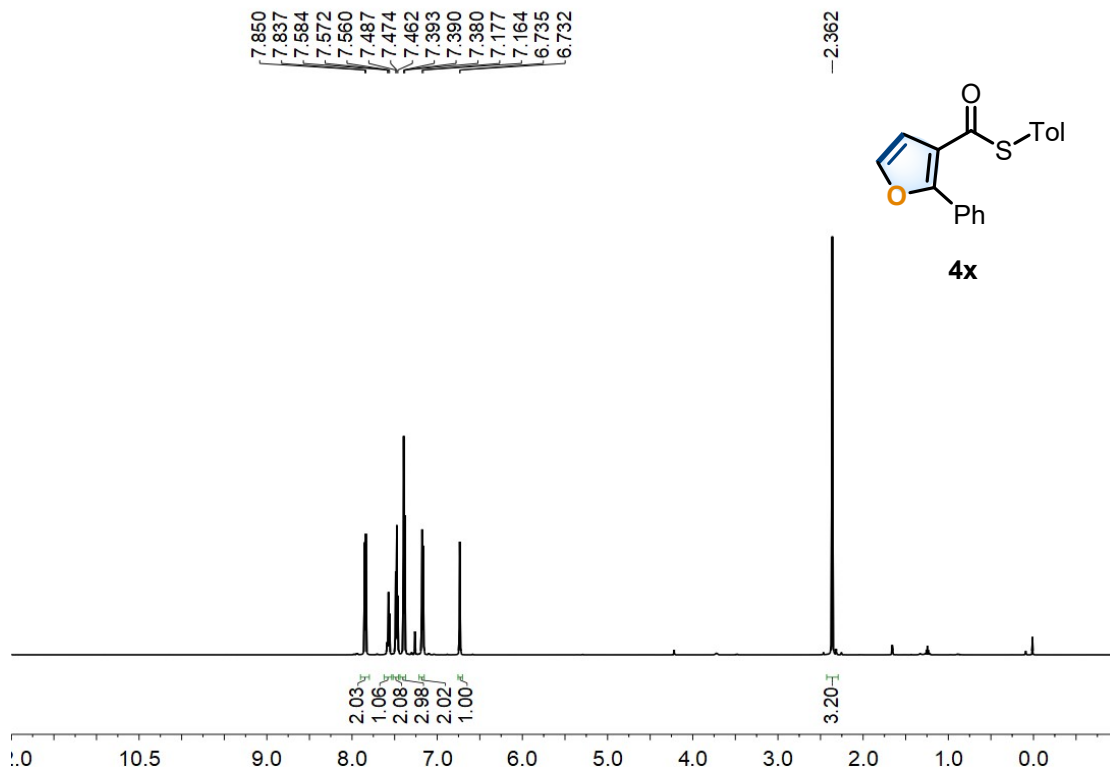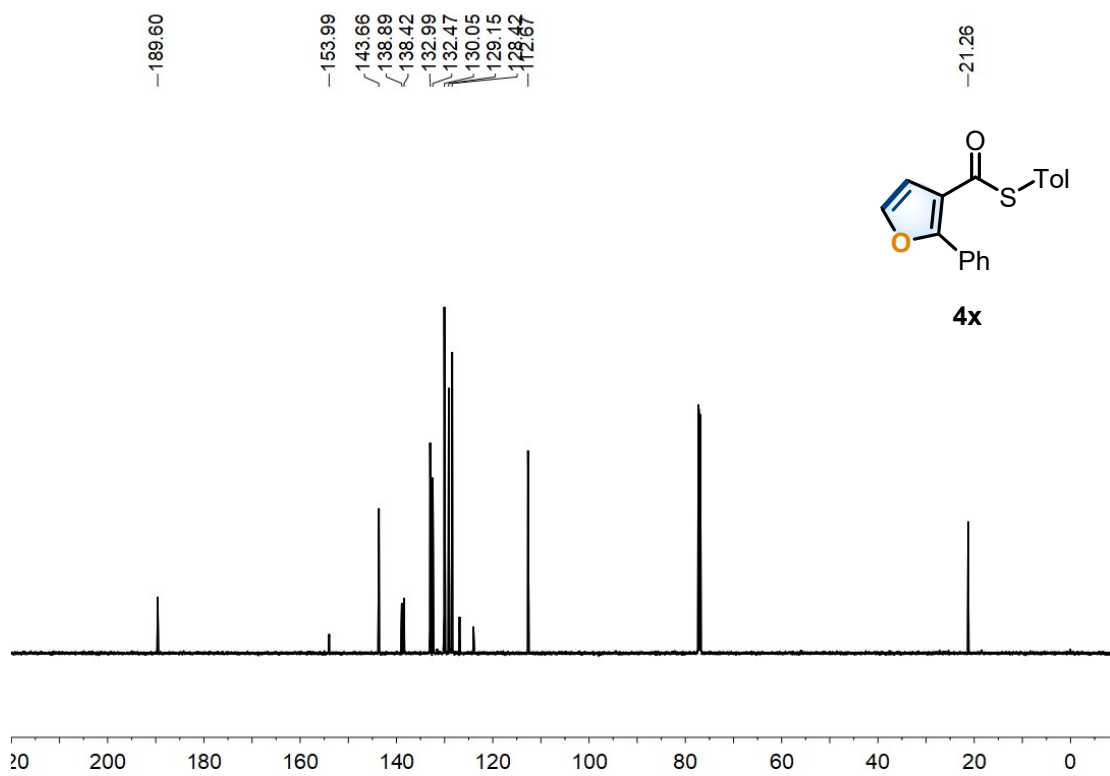

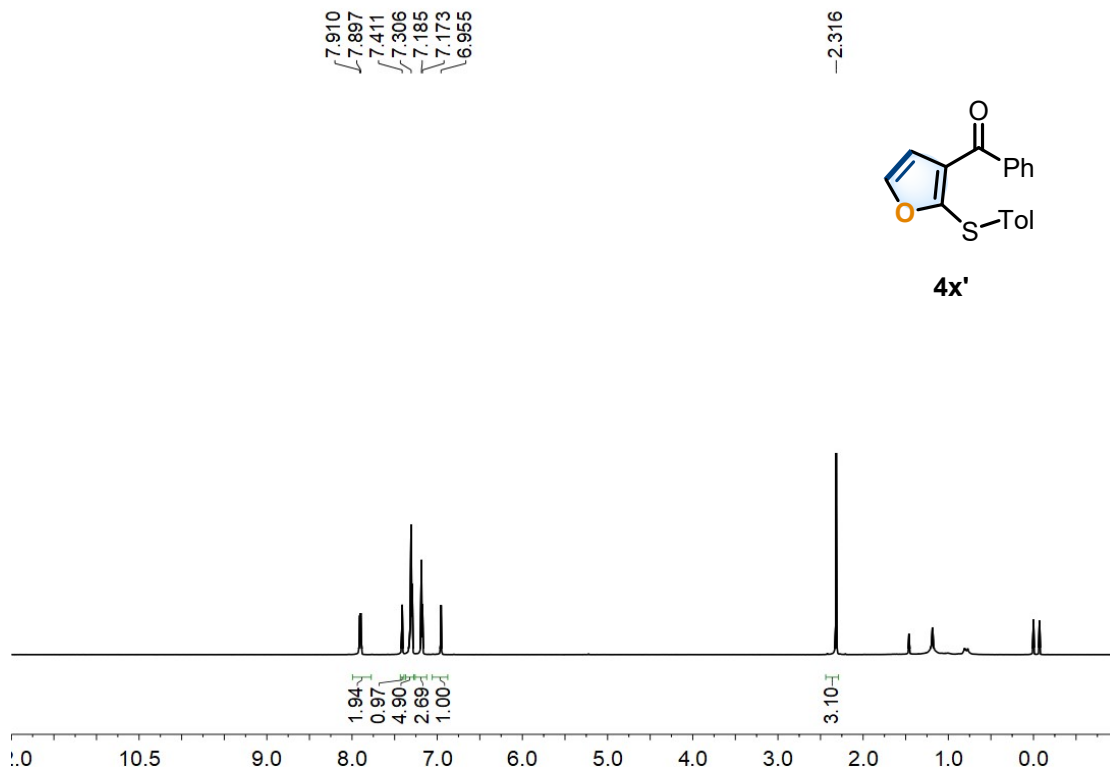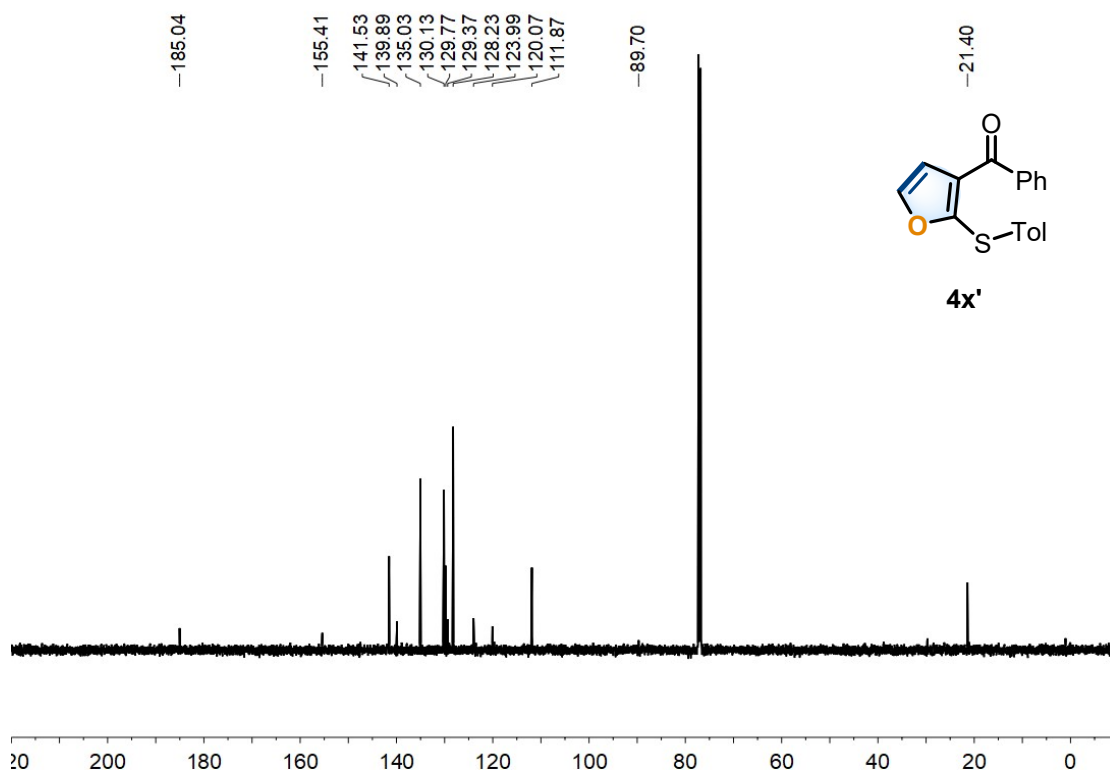

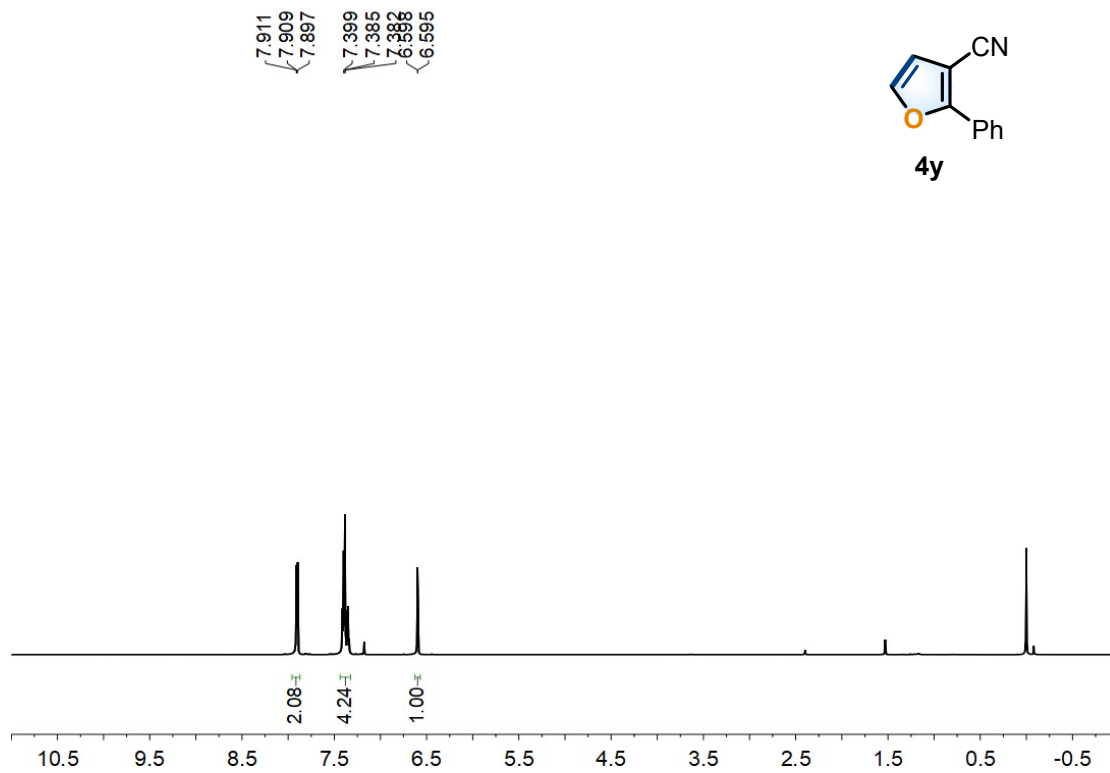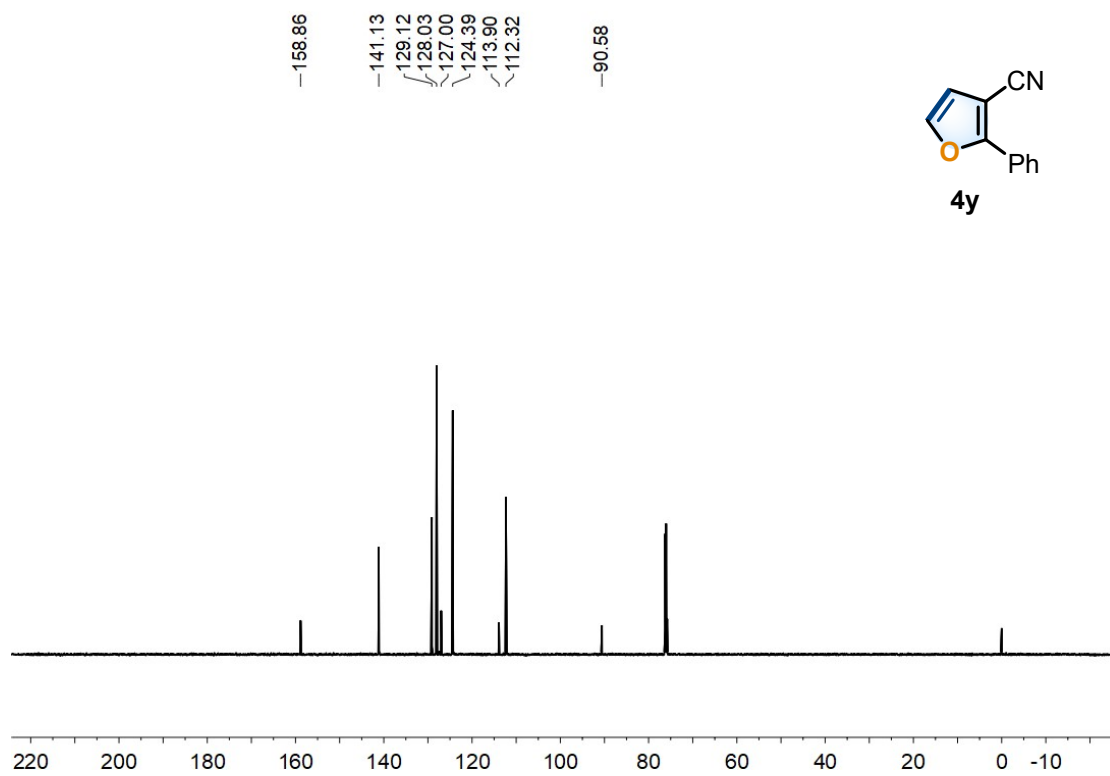

7.829  
7.823  
7.817  
7.429  
7.420  
7.357  
7.185  
6.990

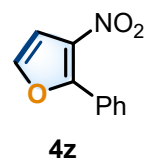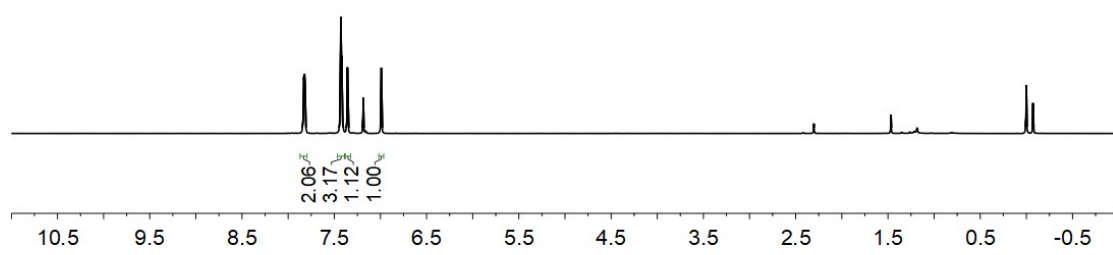

-153.13  
-141.31  
130.86  
128.98  
128.44  
127.47  
-109.11

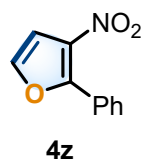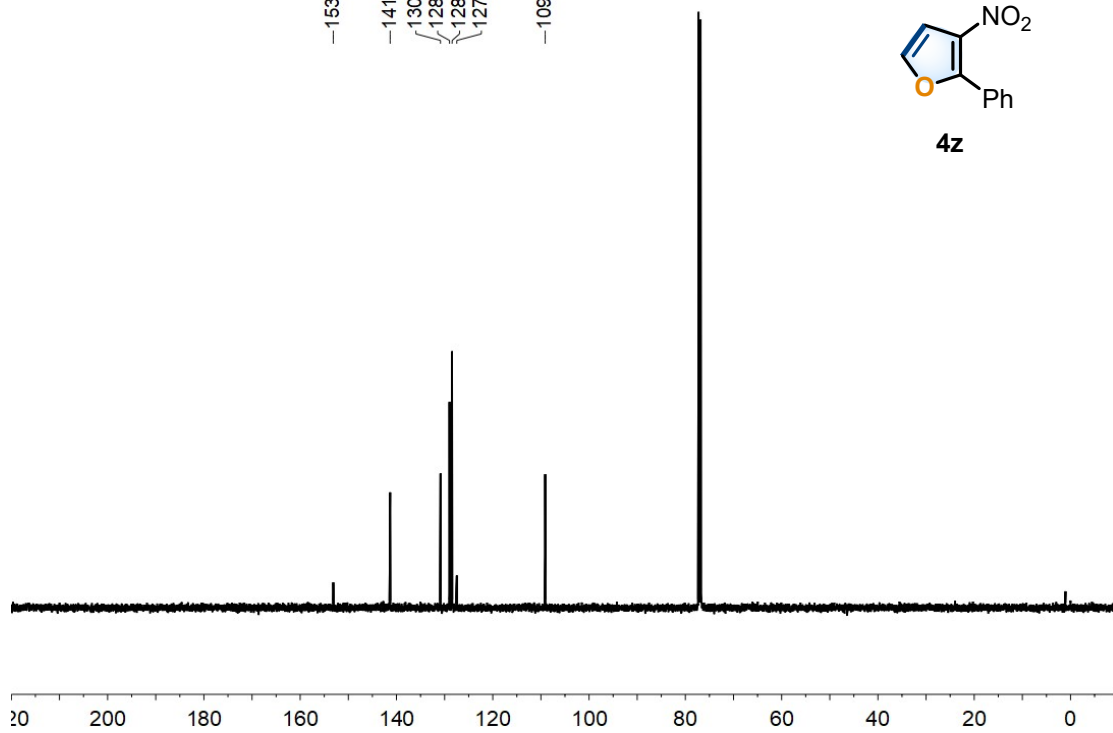

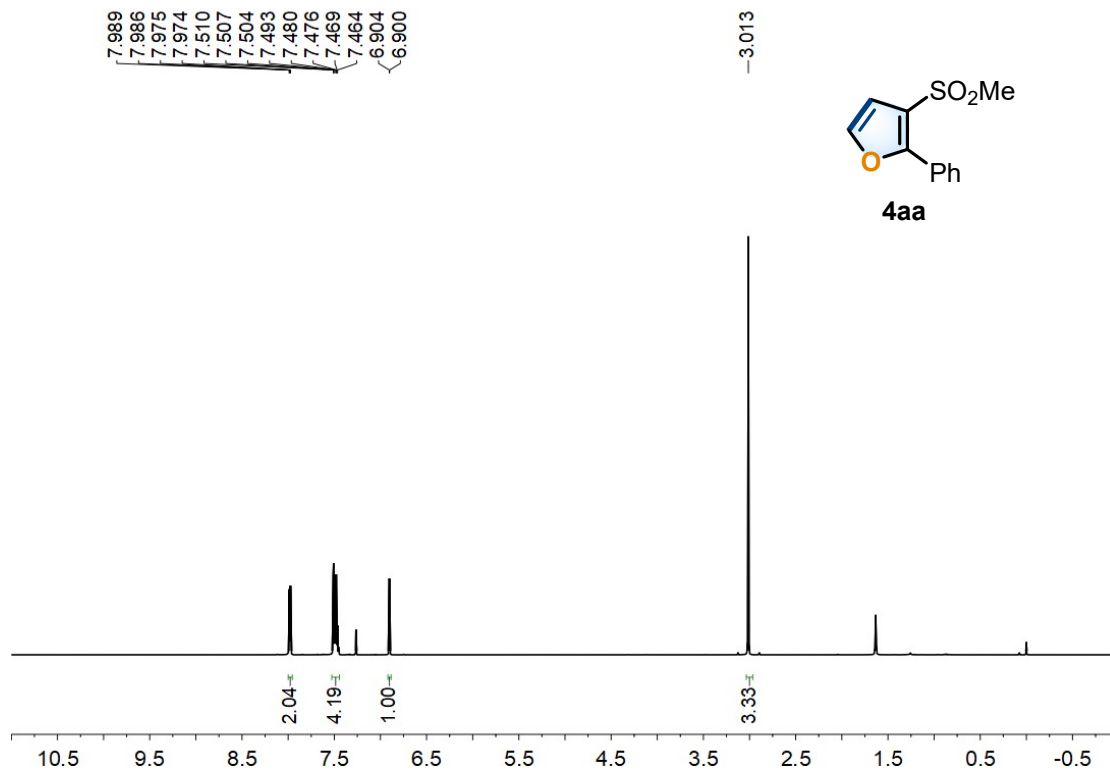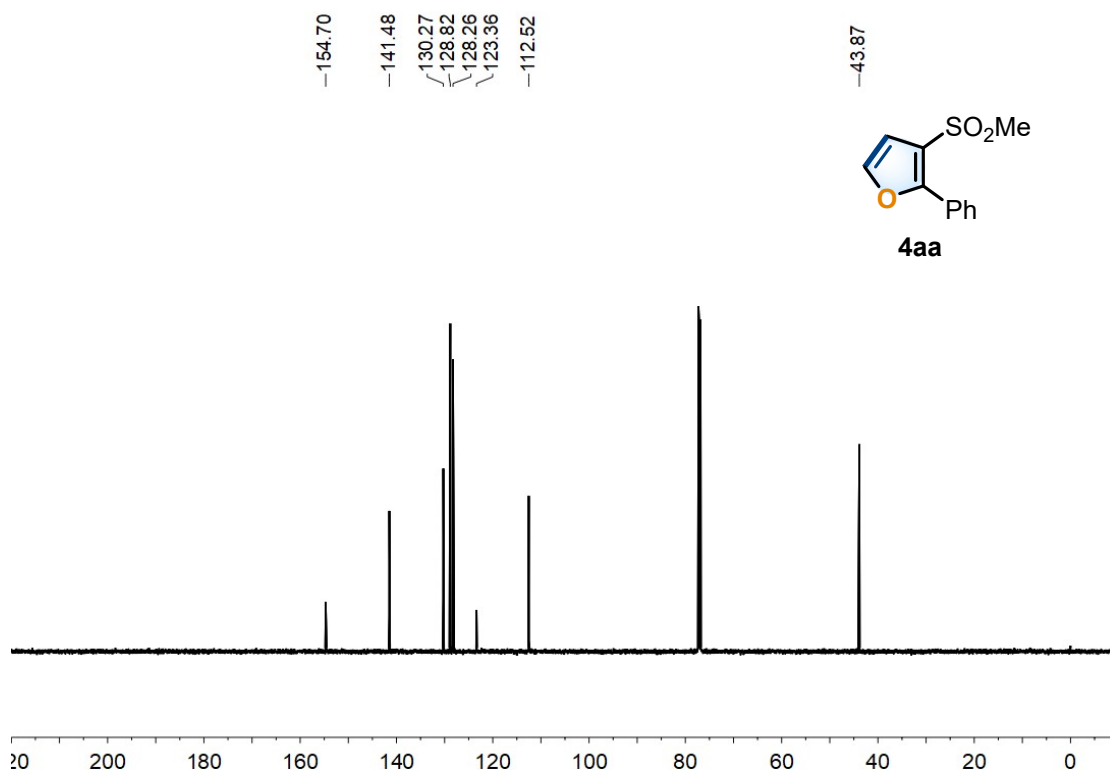

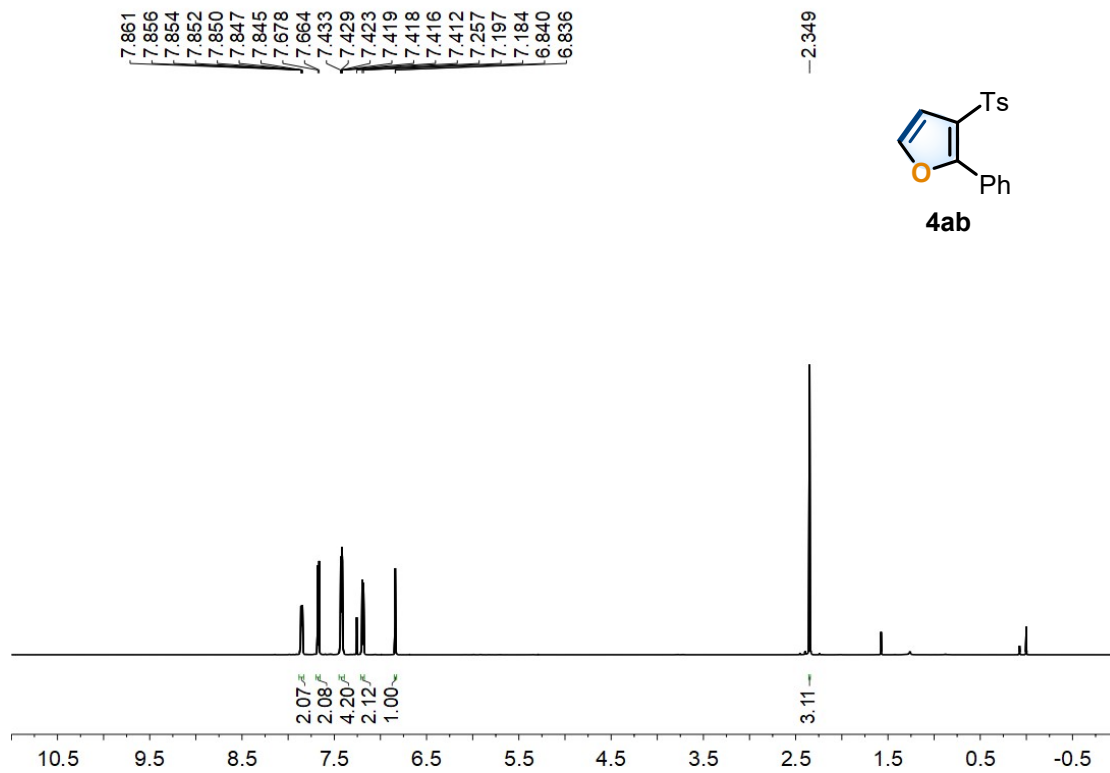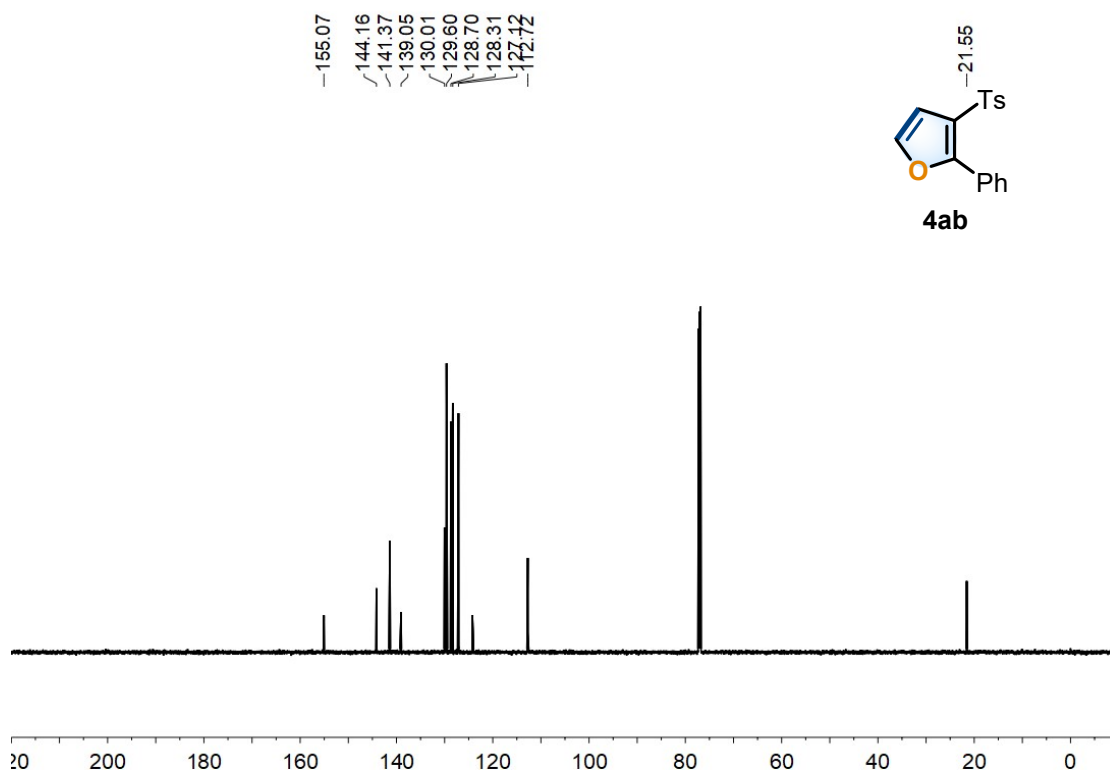



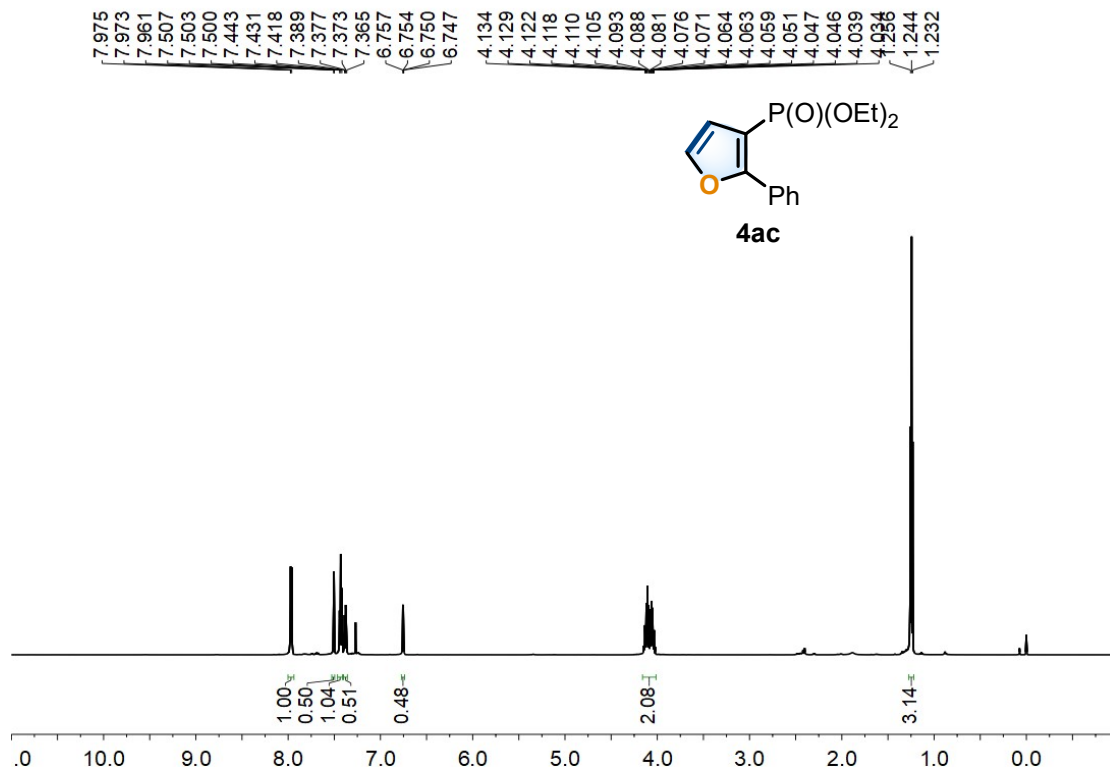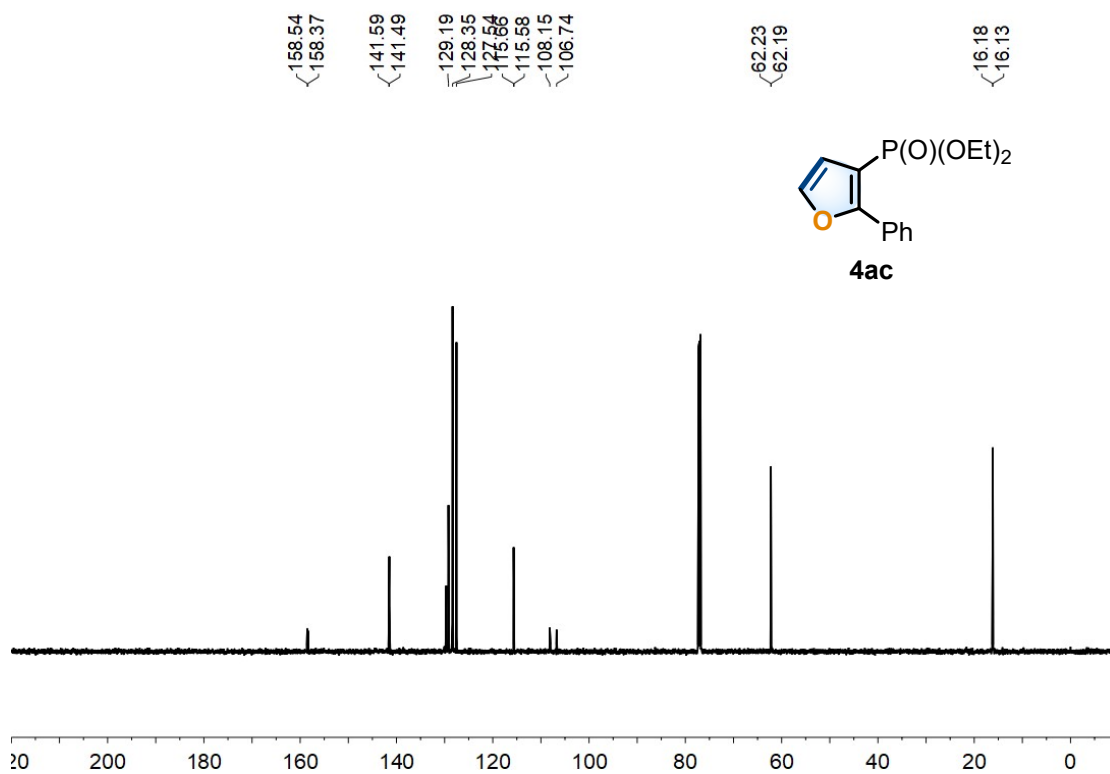

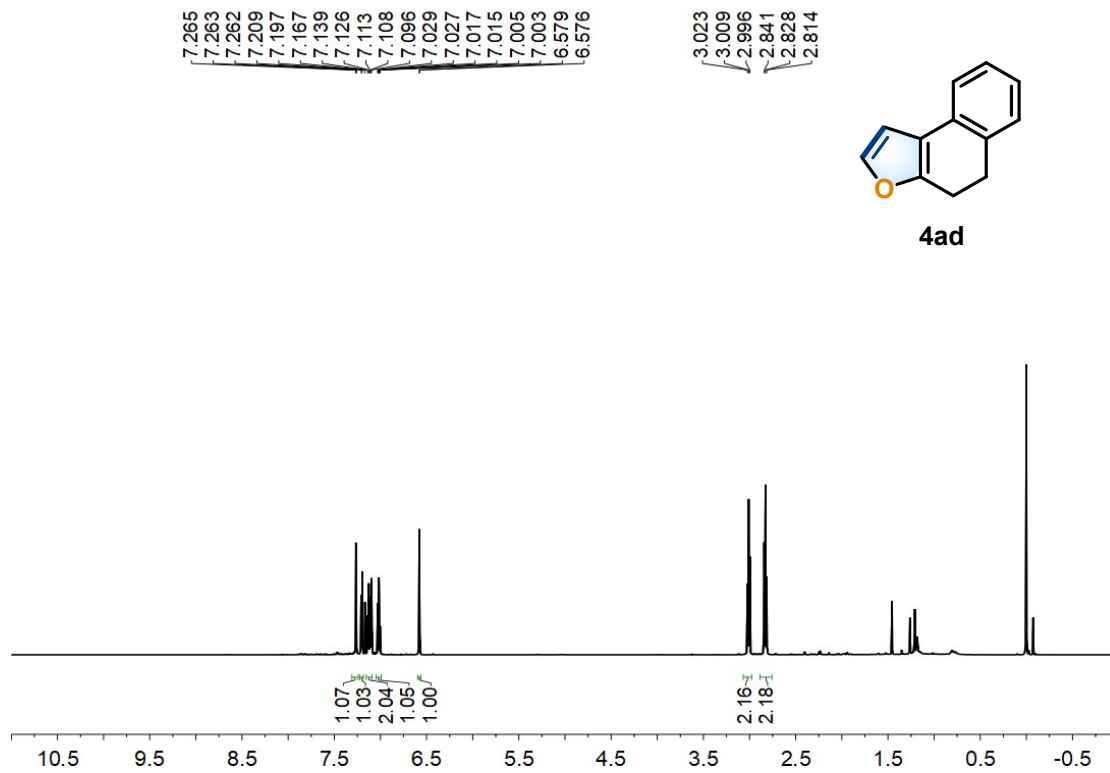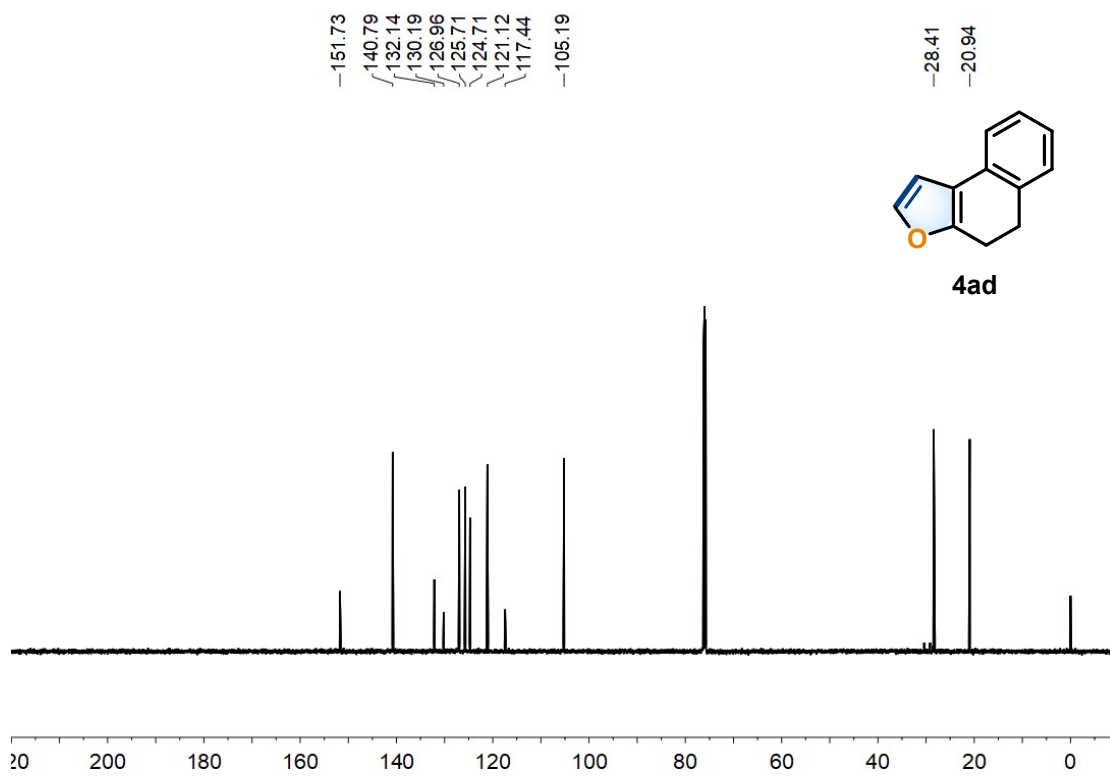

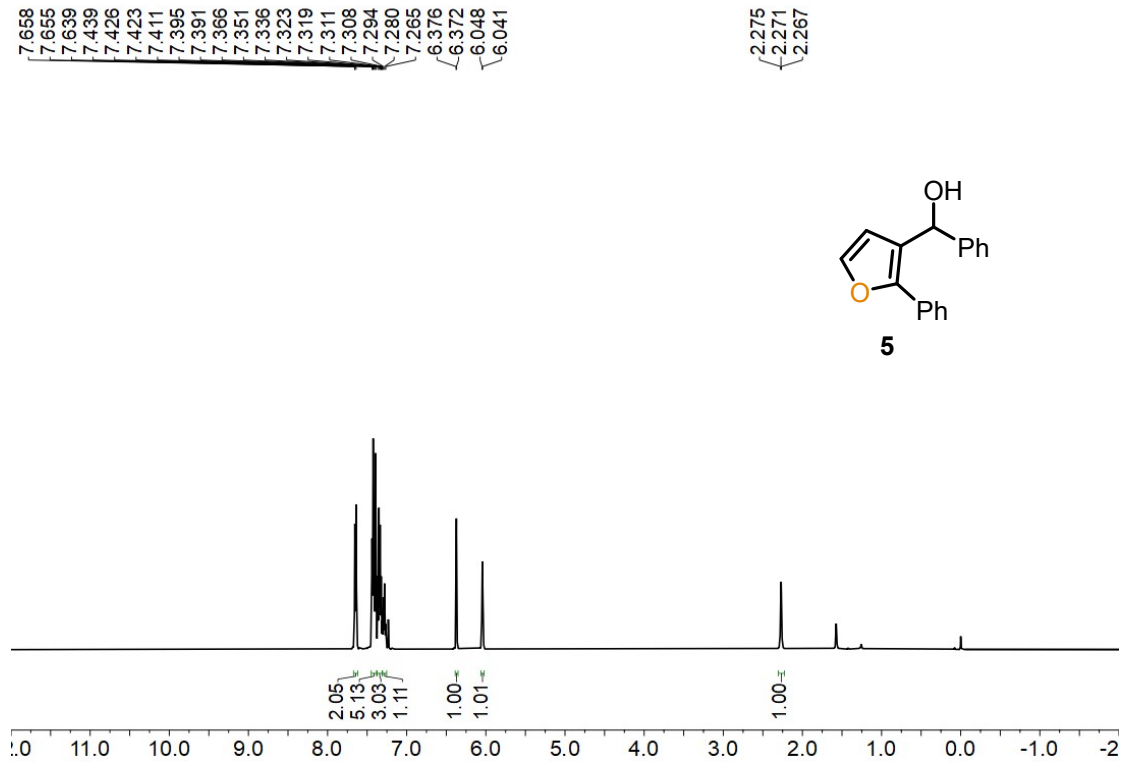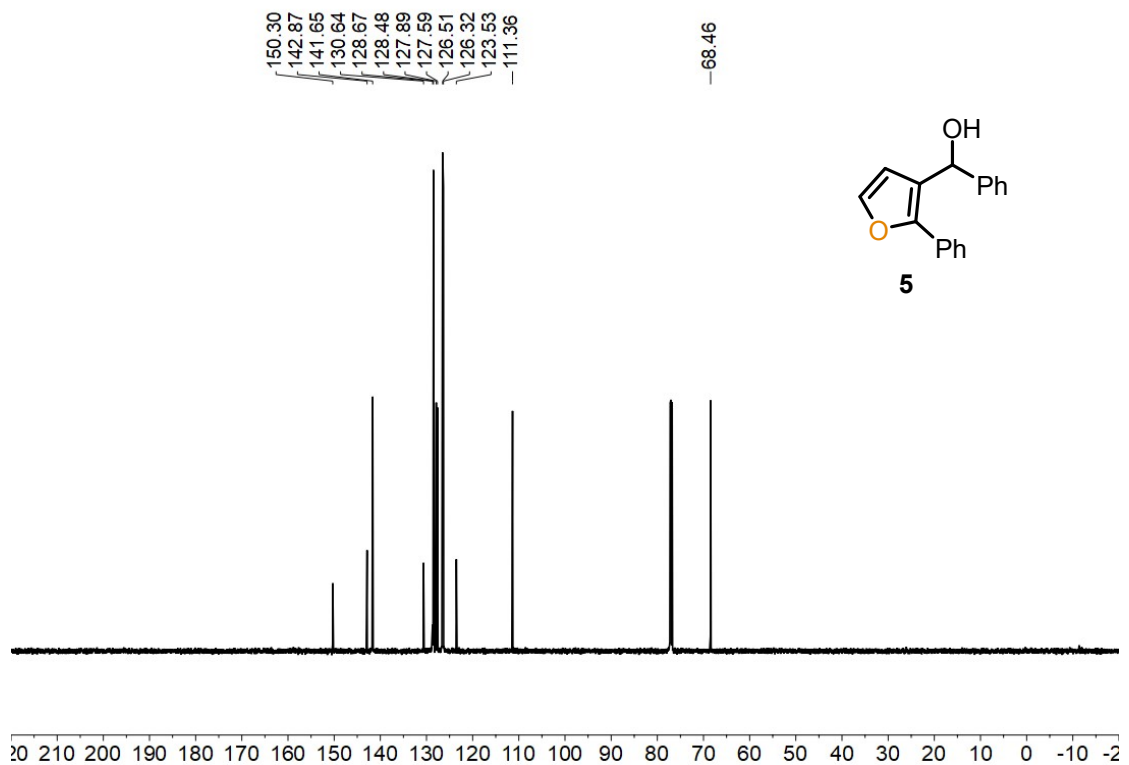

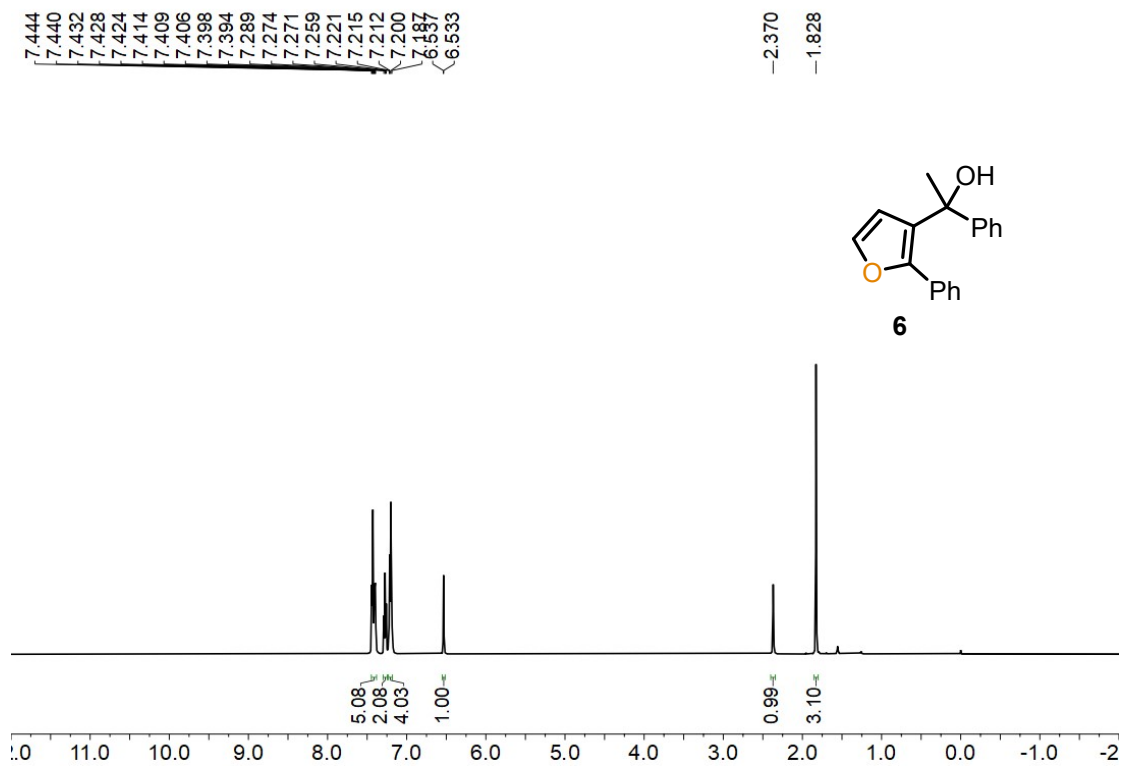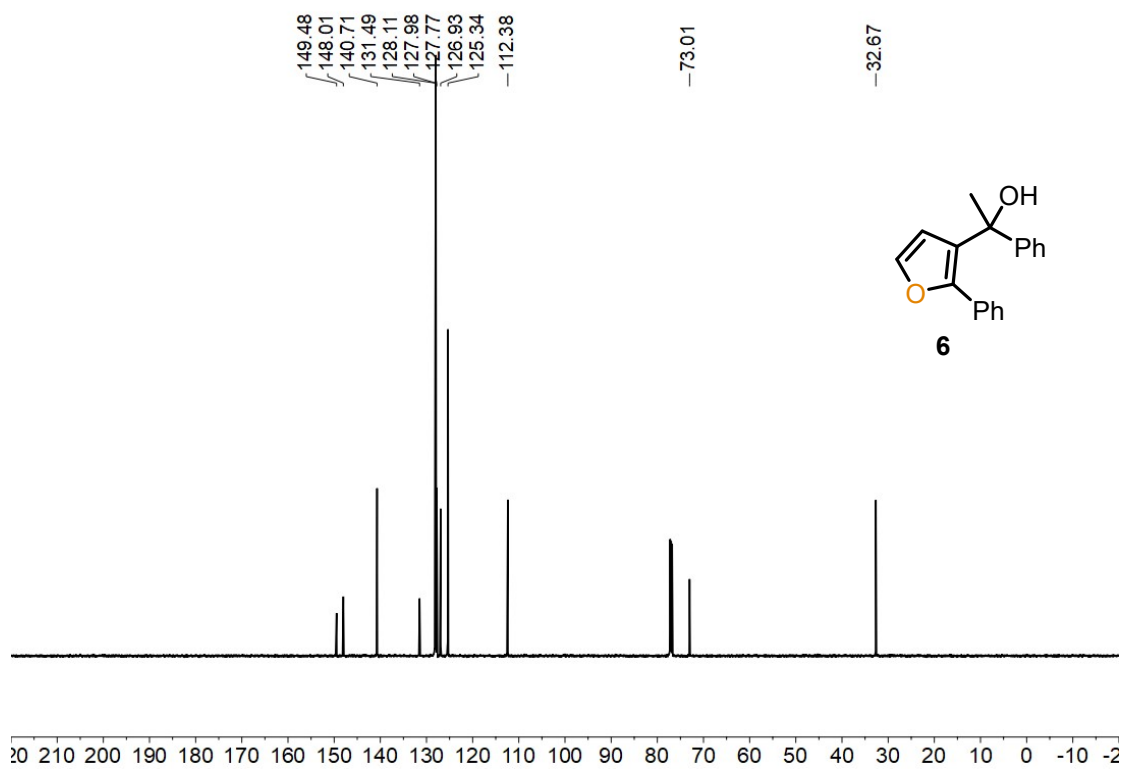

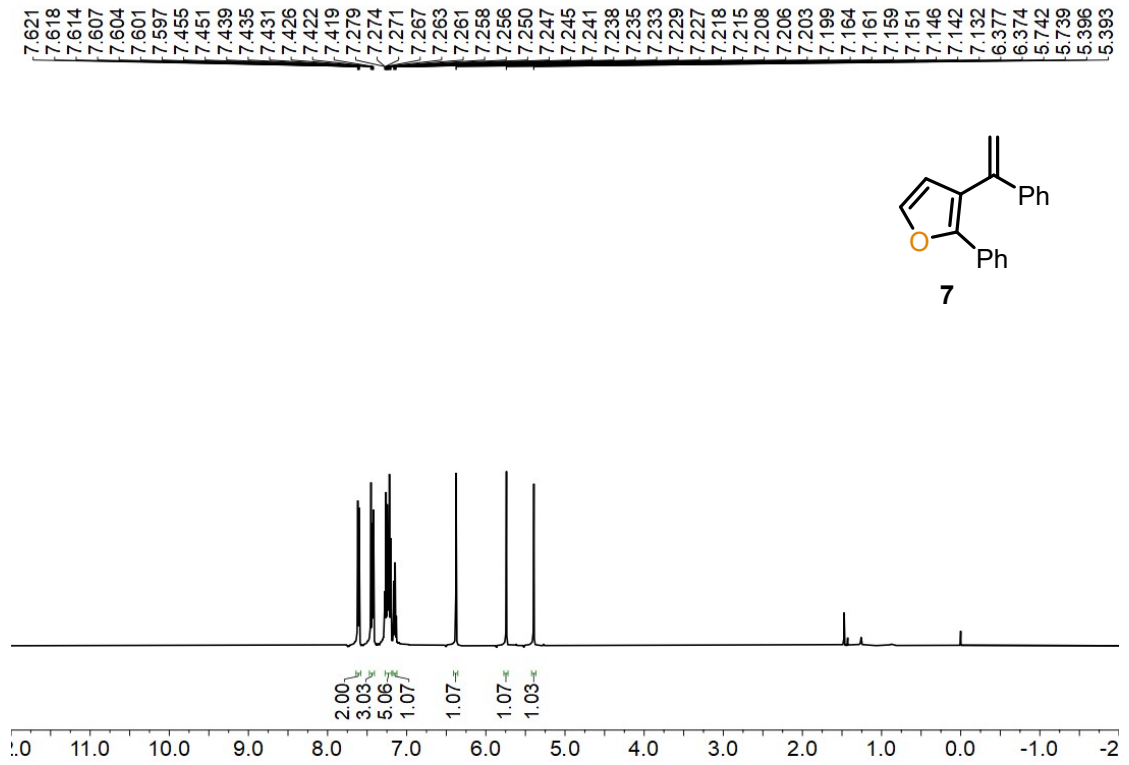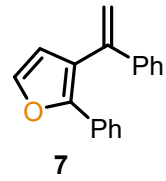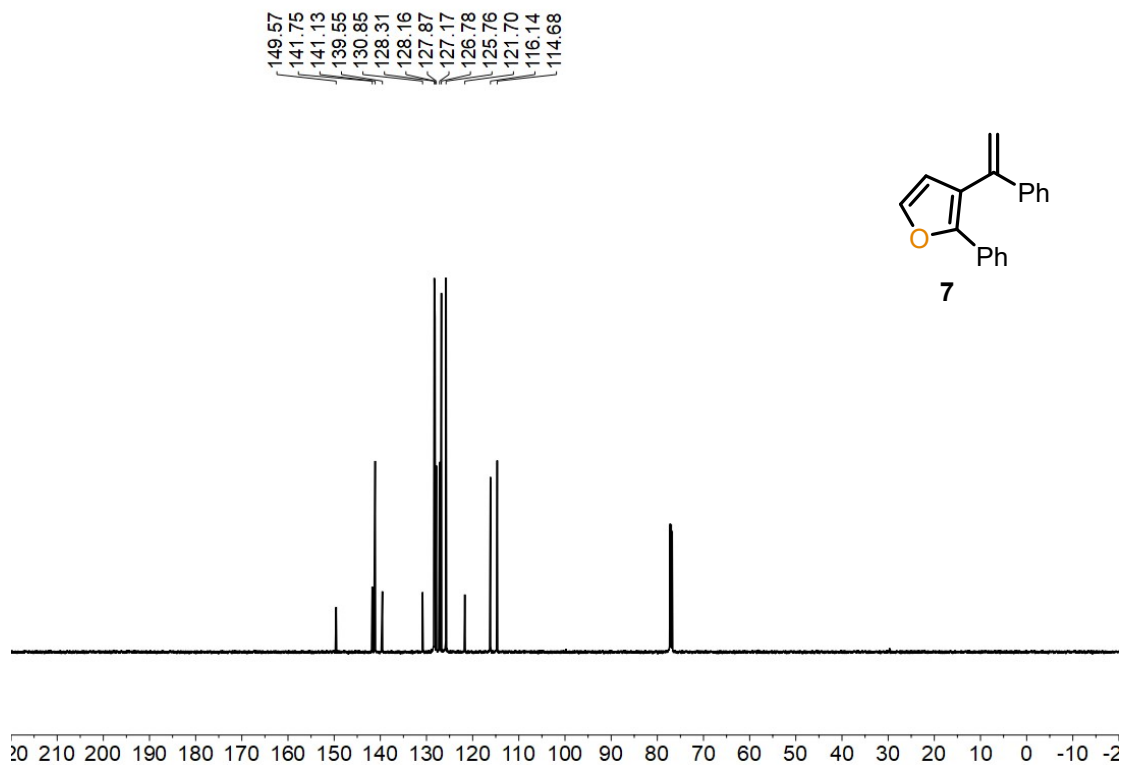

7.91  
7.90  
7.82  
7.80  
7.80  
7.79  
7.78  
7.77  
7.55  
7.54  
7.53  
7.52  
7.45  
7.44  
7.43  
7.42  
7.41  
7.40  
7.36  
7.35  
7.35  
7.34  
7.34  
7.34  
7.33  
7.33  
6.94

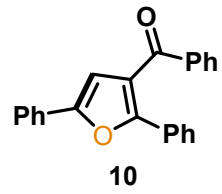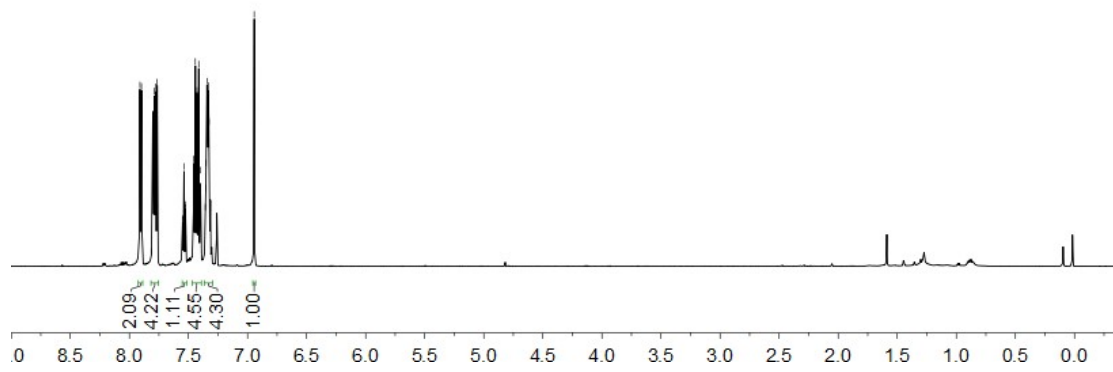

191.735  
154.946  
152.437  
137.981  
132.893  
129.737  
129.689  
128.992  
128.828  
128.356  
128.330  
128.137  
127.415  
124.048  
122.790  
108.658

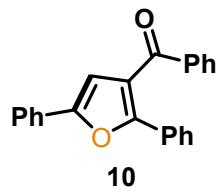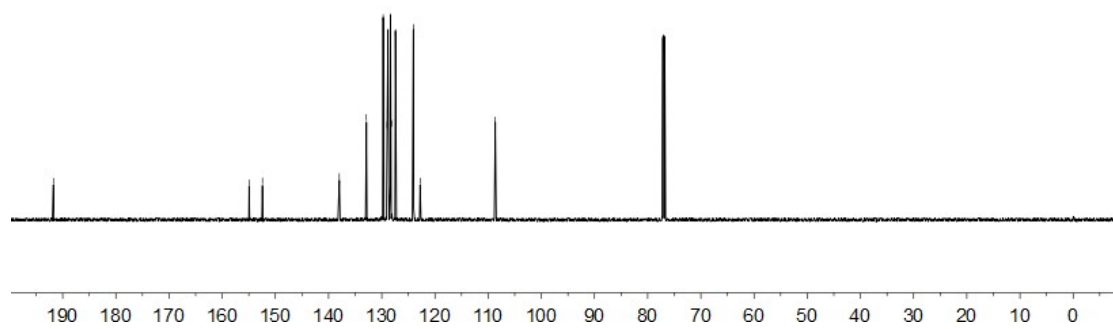

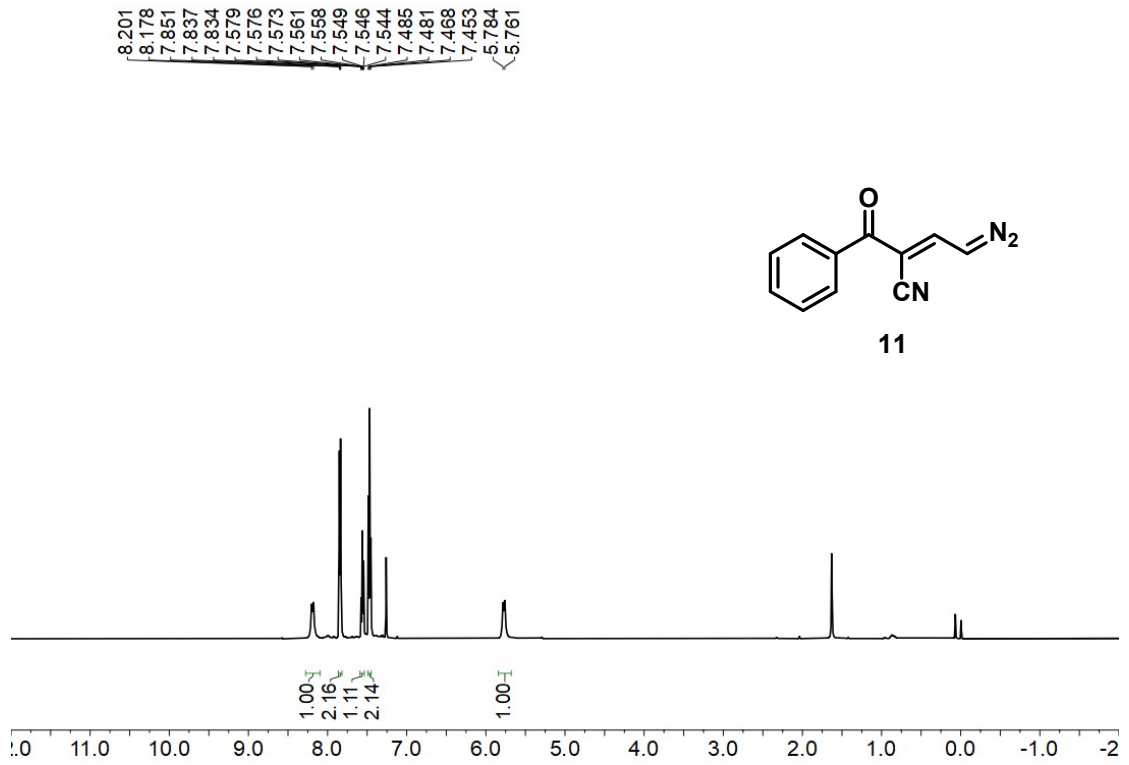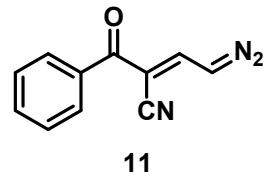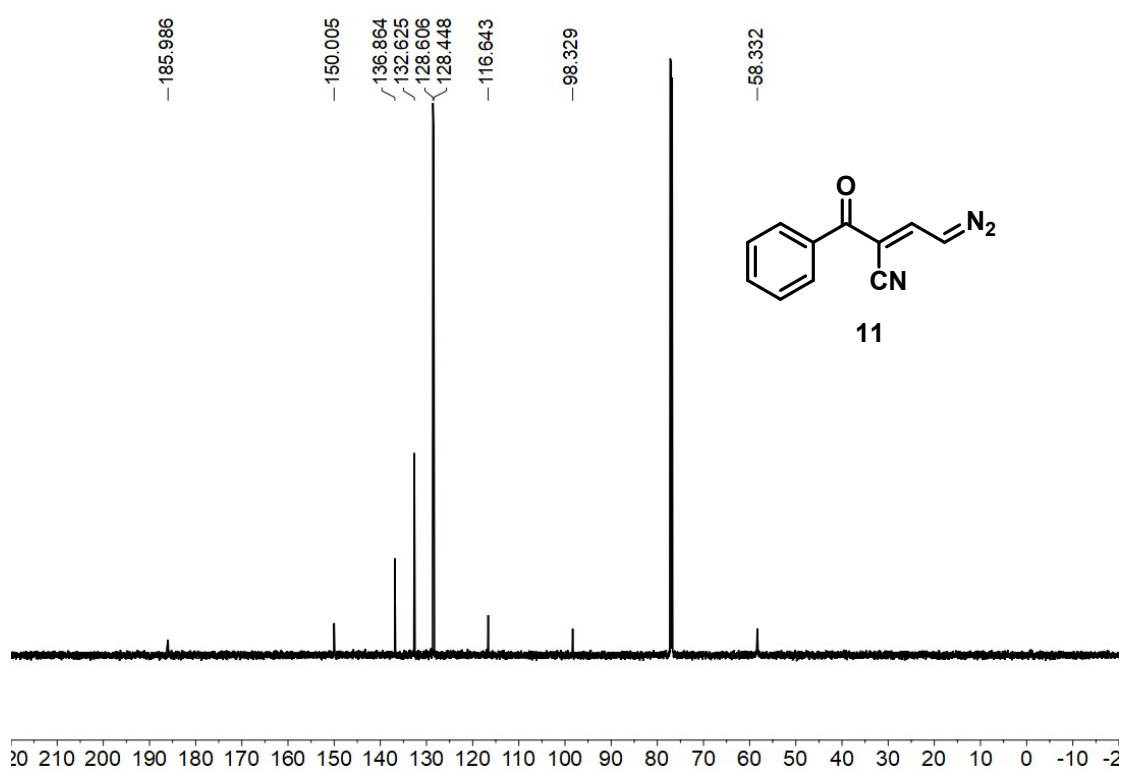

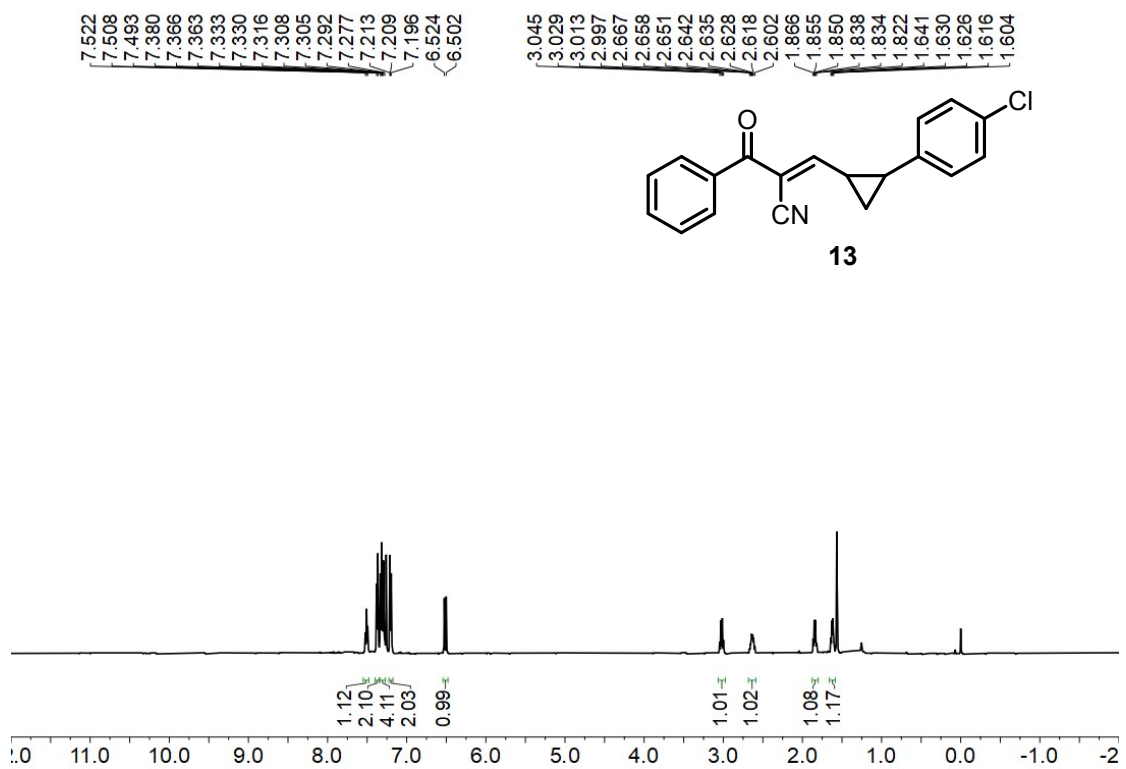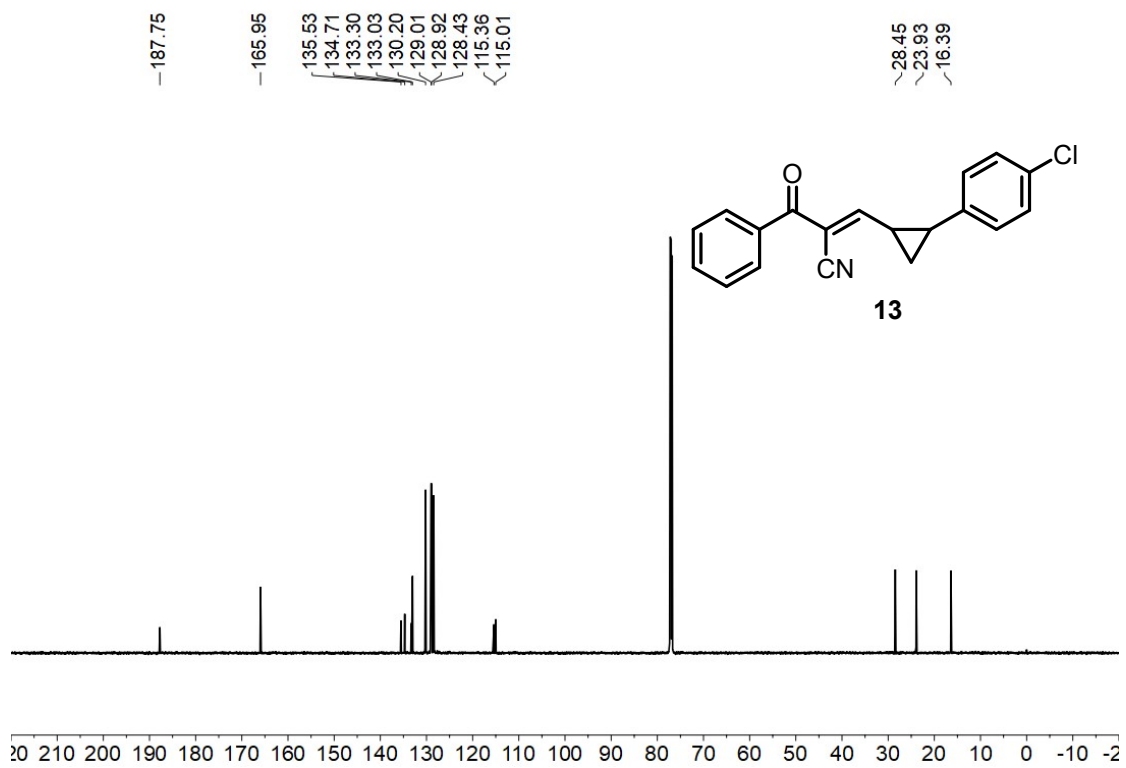



## VII. Computational details

**Computational details:** All theoretical calculations of this work were performed based on density functional theory (DFT) methods with Gaussian 09 program.<sup>[1]</sup> All geometry optimizations were performed using the Becke's three-parameter hybrid exchange functional with Lee–Yang–Parr gradient-corrected correlation function (B3LYP)<sup>[2-5]</sup> and added the D3 version of Grimme's dispersion with Becke-Johnson damping.<sup>[6]</sup> All the atoms were described with the basis set 6-31G(d,p), double- $\zeta$  quality basis set.<sup>[7-10]</sup> We performed single-point energy calculations for all the optimized structures at the M06-2X/6-311++G(d,p) [11] level with solvent effects simulated by the SMD solvent model<sup>[12]</sup> (solvent = dichloromethane). The vibrational frequency analysis of reactants, products, intermediates and the transition states were given at the same level. All reactant, intermediate and product configurations having no imaginary frequency and each transition state has only one imaginary frequency, which has been confirmed by the intrinsic reaction coordinate (IRC).<sup>[13,14]</sup> The key 3D structures were prepared using the CYLview visualization program.<sup>[15]</sup>

### Ball-and-stick models of Int3, Int4, and Int5

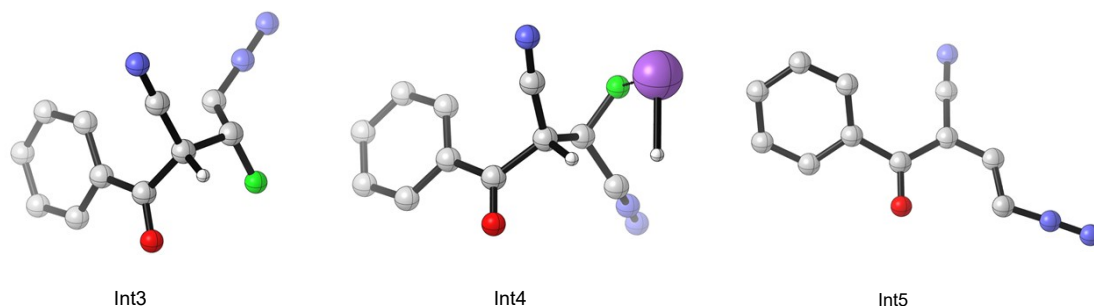

1. Frisch, M.J., Trucks, G.W., Schlegel, H.B., Scuseria, G.E., Robb, M.A., Cheeseman, J.R., Scalmani, G., Barone, V., Mennucci, B., Petersson, G.A., Nakatsuji, H., Caricato, M., Li, X., Hratchian, H.P., Izmaylov, A. F., Bloino, J., Zheng, G., Sonnenberg, J.L., Hada, M., Ehara, M., Toyota, K., Fukuda, R., Hasegawa, J., Ishida, M., Nakajima, T., Honda, Y., Kitao, O., Nakai, H., Vreven, T., Montgomery, J.A., Jr., Peralta, J.E., Ogliaro, F., Bearpark, M., Heyd, J.J., Brothers, E., Kudin, K.N., Staroverov, V.N., Keith, T., Kobayashi, R., Normand, J., Raghavachari, K., Rendell, A., Burant, J.C., Iyengar, S.S., Tomasi, J., Cossi, M., Rega, N., Millam, J. M., Klene, M., Knox, J.E., Cross, J.B., Bakken, V., Adamo, C., Jaramillo, J., Gomperts, R., Stratmann, R.E., Yazyev, O., Austin, A.J., Cammi, R., Pomelli, C., Ochterski, J.W., Martin, R.L., Morokuma, K., Zakrzewski, V.G., Voth, G.A., Salvador, P., Dannenberg,

- J.J., Dapprich, S., Daniels, A.D., Farkas, O., Foresman, J.B., Ortiz, J.V., Cioslowski, J., and Fox, D.J. **2010**. Gaussian 09, Rev. D.01; Gaussian, Inc.: Wallingford, CT.
- 2 · Becke, A.D. Density-functional exchange-energy approximation with correct asymptotic behavior. *Phys. Rev. A*. **1998**, *38*, 3098–3100.
3. Becke, A.D. Density-functional thermochemistry. III. The role of exact exchange. *J. Chem. Phys.* **1993**, *98*, 5648–5652.S45
4. Lee, C., Yang, W., and Parr, R.G. Development of the Colle-Salvetti correlation-energy formula into a functional of the electron density. *Phys. Rev. B: Condens. Matter*. **1988**, *37*, 785–789.
5. Qi, X.T., Zhang, H., Shao, A., Zhu, L., Xu, T., Gao, M., Liu, C., and Lan, Yu. Silver migration facilitates isocyanide-alkyne [3+2] cycloaddition reactions: combined experimental and theoretical study. *ACS Catal.* **2015**, *5*, 6640–6647.
6. S. Grimme, S. Ehrlich and L. Goerigk, “Effect of the damping function in dispersion corrected density functional theory,” *J. Comp. Chem.* **2011**, *32*, 1456–65.
7. Hehre, W.J., Ditchfield, R., and Pople, J.A. Self-consistent molecular orbital methods. XII. Further extensions of Gaussian-type basis sets for use in molecular orbital studies of organic molecules. *J. Chem. Phys.* **1972**, *56*, 2257.
8. Dill, J. D. & Pople, J. A. Self-consistent molecular orbital methods. XV. Extended Gaussian-type basis sets for lithium, beryllium, and boron. *J. Chem. Phys.* **1975**, *62*, 2921.
9. Francel, M. M., Petro, W. J., Hehre, W. J., Binkley, J. S., Gordon, M. S., DeFrees, D. J. & Pople, J. A. Self-consistent molecular orbital methods. XXIII. A polarization-type basis set for second-row elements. *J. Chem. Phys.* **1982**, *77*, 3654.
10. Zhao, Y., and Truhlar, D.G. Density functionals with broad applicability in chemistry. *Acc. Chem. Res.* **2008**, *41*, 157–167.
11. Xiao, P., Yuan, H., Liu, J.-Q., Zheng, Y.-Y., Bi, X.-H. & Zhang, J.-P. Radical Mechanism of Isocyanide-Alkyne Cycloaddition by Multicatalysis of Ag<sub>2</sub>CO<sub>3</sub>, Solvent, and Substrate. *ACS Catal.* **2015**, *5*, 6177–6184.
12. Roy, L.E., Hay, P.J., and Martin, R.L. Revised basis sets for the LANL effective core potentials. *J. Chem. Theory Comput.* **2008**, *4*, 1029–1031.
13. Fukui, K.A. Formulation of the Reaction Coordinate. Formulation of the reaction coordinate. *J. Phys. Chem.* **1970**, *74*, 4161–4163.

14. Fukui, K. The path of chemical reactions-the IRC approach. *Acc. Chem. Res.* **1981**, *14*, 363–368.
15. Legault, C.Y. CYLview, 1.0b; Université de Sherbrooke: Sherbrooke, Quebec, Canada, **2009**;  
<http://www.cylview.org>.

### **Cartesian coordinates of all optimized structures**

#### **3w**

|                                              |                             |
|----------------------------------------------|-----------------------------|
| Zero-point correction=                       | 0.137634 (Hartree/Particle) |
| Thermal correction to Energy=                | 0.147478                    |
| Thermal correction to Enthalpy=              | 0.148469                    |
| Thermal correction to Gibbs Free Energy=     | 0.100533                    |
| Sum of electronic and zero-point Energies=   | -476.942642                 |
| Sum of electronic and thermal Energies=      | -476.932798                 |
| Sum of electronic and thermal Enthalpies=    | -476.931807                 |
| Sum of electronic and thermal Free Energies= | -476.979743                 |

|   |             |             |             |
|---|-------------|-------------|-------------|
| C | -1.79546500 | -1.53231800 | 0.38281800  |
| C | -0.52703100 | -0.96261800 | 0.46515500  |
| C | -0.33575200 | 0.38142300  | 0.11211700  |
| C | -1.43127200 | 1.14435100  | -0.32329900 |
| C | -2.69477900 | 0.57265700  | -0.40535000 |
| C | -2.87836700 | -0.76723300 | -0.05154800 |
| H | -1.93710400 | -2.57334200 | 0.65390800  |
| H | 0.30535300  | -1.57519200 | 0.79136600  |
| H | -1.26143400 | 2.18131300  | -0.58996700 |
| H | -3.53772300 | 1.16619700  | -0.74446000 |
| H | -3.86534700 | -1.21477200 | -0.11657600 |
| C | 0.98566800  | 1.05664300  | 0.19095100  |
| O | 1.13302700  | 2.23785200  | -0.06175600 |
| C | 2.22137200  | 0.24476300  | 0.65141600  |
| H | 2.05129900  | -0.14078900 | 1.66367100  |
| H | 3.05852100  | 0.94531900  | 0.68747000  |
| C | 2.54963900  | -0.87115800 | -0.23165400 |
| N | 2.79401900  | -1.75580200 | -0.94214100 |

#### **Int1**

|                                            |                             |
|--------------------------------------------|-----------------------------|
| Zero-point correction=                     | 0.140360 (Hartree/Particle) |
| Thermal correction to Energy=              | 0.152848                    |
| Thermal correction to Enthalpy=            | 0.153839                    |
| Thermal correction to Gibbs Free Energy=   | 0.098788                    |
| Sum of electronic and zero-point Energies= | -639.783810                 |
| Sum of electronic and thermal Energies=    | -639.771322                 |

Sum of electronic and thermal Enthalpies= -639.770330  
 Sum of electronic and thermal Free Energies= -639.825381

|    |             |             |             |
|----|-------------|-------------|-------------|
| C  | 2.62099600  | 0.67621600  | 0.80157700  |
| C  | 1.25074500  | 0.77228800  | 0.57075800  |
| C  | 0.58877300  | -0.23515100 | -0.15052300 |
| C  | 1.32277800  | -1.33717200 | -0.62776800 |
| C  | 2.69190500  | -1.41660400 | -0.41175900 |
| C  | 3.34359400  | -0.40862600 | 0.30526900  |
| H  | 3.12350200  | 1.45362600  | 1.36731700  |
| H  | 0.70687500  | 1.61999600  | 0.96448900  |
| H  | 0.79709600  | -2.11252400 | -1.17297500 |
| H  | 3.25359300  | -2.26156200 | -0.79696200 |
| H  | 4.41366600  | -0.47128200 | 0.47755800  |
| C  | -0.86920400 | -0.23412600 | -0.39357400 |
| O  | -1.45606200 | -1.29931200 | -0.64315600 |
| C  | -1.75653000 | 0.98534900  | -0.26025600 |
| H  | -2.34461400 | 0.79531200  | 0.69712500  |
| H  | -2.52094500 | 0.90485800  | -1.03919200 |
| C  | -1.18216700 | 2.31913500  | -0.30072200 |
| N  | -0.75701800 | 3.39960400  | -0.33095600 |
| Na | -3.19754400 | -1.80930700 | 0.72753100  |
| H  | -3.37391400 | -0.15663400 | 1.76372300  |

### TS1

Zero-point correction= 0.138815 (Hartree/Particle)  
 Thermal correction to Energy= 0.151110  
 Thermal correction to Enthalpy= 0.152101  
 Thermal correction to Gibbs Free Energy= 0.097247  
 Sum of electronic and zero-point Energies= -639.780978  
 Sum of electronic and thermal Energies= -639.768682  
 Sum of electronic and thermal Enthalpies= -639.767691  
 Sum of electronic and thermal Free Energies= -639.822545

|   |            |             |             |
|---|------------|-------------|-------------|
| C | 2.60432100 | 0.79059800  | 0.74232200  |
| C | 1.23196200 | 0.83845800  | 0.50640900  |
| C | 0.59679300 | -0.21956300 | -0.16463100 |
| C | 1.36312900 | -1.32189800 | -0.58638400 |
| C | 2.73388100 | -1.35497000 | -0.36509900 |
| C | 3.35801300 | -0.29715200 | 0.30205700  |
| H | 3.08406700 | 1.60917500  | 1.26879700  |
| H | 0.66605400 | 1.69150900  | 0.85454700  |
| H | 0.85951600 | -2.13616200 | -1.09426000 |

|    |             |             |             |
|----|-------------|-------------|-------------|
| H  | 3.31789100  | -2.20310400 | -0.70845300 |
| H  | 4.42901300  | -0.32269400 | 0.47857300  |
| C  | -0.86179300 | -0.26987900 | -0.42328100 |
| O  | -1.40283600 | -1.37893800 | -0.63559400 |
| C  | -1.78379900 | 0.88838800  | -0.31138800 |
| H  | -2.41516500 | 0.59757700  | 0.70761300  |
| H  | -2.57858600 | 0.77265600  | -1.05308100 |
| C  | -1.30940600 | 2.25101800  | -0.30209300 |
| N  | -0.97514500 | 3.36482500  | -0.26981700 |
| Na | -3.06798800 | -1.84819800 | 0.77512800  |
| H  | -3.16481300 | -0.03104900 | 1.60585800  |

## Int2

|                                              |                             |
|----------------------------------------------|-----------------------------|
| Zero-point correction=                       | 0.174338 (Hartree/Particle) |
| Thermal correction to Energy=                | 0.193644                    |
| Thermal correction to Enthalpy=              | 0.194635                    |
| Thermal correction to Gibbs Free Energy=     | 0.122883                    |
| Sum of electronic and zero-point Energies=   | -1025.144961                |
| Sum of electronic and thermal Energies=      | -1025.125656                |
| Sum of electronic and thermal Enthalpies=    | -1025.124664                |
| Sum of electronic and thermal Free Energies= | -1025.196416                |

|    |             |             |             |
|----|-------------|-------------|-------------|
| C  | 3.46098400  | -1.44450900 | 0.65819300  |
| C  | 2.41044900  | -0.63484700 | 1.08652900  |
| C  | 1.97503300  | 0.43604400  | 0.29376400  |
| C  | 2.62891400  | 0.69399600  | -0.91995800 |
| C  | 3.67551600  | -0.11600900 | -1.34785800 |
| C  | 4.09209600  | -1.19162100 | -0.56023900 |
| H  | 3.79137500  | -2.26929500 | 1.28204900  |
| H  | 1.94075100  | -0.83174500 | 2.04205100  |
| H  | 2.29774200  | 1.54152500  | -1.50856900 |
| H  | 4.16843800  | 0.08969900  | -2.29336500 |
| H  | 4.90970400  | -1.82512200 | -0.89143700 |
| C  | 0.85977400  | 1.34903800  | 0.69414000  |
| O  | 0.79953100  | 2.49629900  | 0.12713800  |
| C  | -0.14659800 | 0.95620200  | 1.60686200  |
| H  | -0.72561800 | 1.75474400  | 2.07009200  |
| C  | -0.45127200 | -0.34713500 | 2.03432700  |
| N  | -0.80719100 | -1.41901800 | 2.35019600  |
| Na | -1.29119000 | 2.18316900  | -0.35738300 |
| N  | -0.31060600 | -0.63751900 | -2.03621100 |
| N  | -1.22443400 | -1.07513800 | -1.50673600 |
| C  | -2.29459300 | -1.53171200 | -0.93680400 |

|   |             |             |             |
|---|-------------|-------------|-------------|
| H | -2.48727100 | -2.59318300 | -0.98510200 |
| C | -3.06307900 | -0.64767700 | -0.01881300 |
| H | -2.73332300 | -0.63626100 | 1.02216400  |
| F | -4.37615500 | -0.96472200 | -0.07384300 |
| F | -2.93969800 | 0.69533100  | -0.48342100 |

## TS2

|                                              |                             |
|----------------------------------------------|-----------------------------|
| Zero-point correction=                       | 0.172676 (Hartree/Particle) |
| Thermal correction to Energy=                | 0.190696                    |
| Thermal correction to Enthalpy=              | 0.191688                    |
| Thermal correction to Gibbs Free Energy=     | 0.125388                    |
| Sum of electronic and zero-point Energies=   | -1025.116406                |
| Sum of electronic and thermal Energies=      | -1025.098386                |
| Sum of electronic and thermal Enthalpies=    | -1025.097394                |
| Sum of electronic and thermal Free Energies= | -1025.163694                |

|    |             |             |             |
|----|-------------|-------------|-------------|
| C  | -3.34479800 | -0.31633400 | 0.13224500  |
| C  | -2.24275400 | -0.70817600 | 0.89257500  |
| C  | -1.02353100 | -1.00548900 | 0.27326700  |
| C  | -0.91479000 | -0.89539200 | -1.12345100 |
| C  | -2.01920200 | -0.49817100 | -1.87828900 |
| C  | -3.23666200 | -0.21344400 | -1.25650400 |
| H  | -4.28671300 | -0.09152200 | 0.62314300  |
| H  | -2.32380400 | -0.78633800 | 1.97153100  |
| H  | 0.06149300  | -1.01651700 | -1.58725500 |
| H  | -1.92637300 | -0.40385300 | -2.95702600 |
| H  | -4.09474200 | 0.09263600  | -1.84763900 |
| C  | 0.16436600  | -1.45416800 | 1.08421300  |
| O  | 0.74222200  | -2.53427100 | 0.74751900  |
| C  | 0.60319400  | -0.65352800 | 2.15314700  |
| H  | 1.39840800  | -1.02724000 | 2.79002700  |
| C  | 0.14964600  | 0.65239100  | 2.36007700  |
| N  | -0.14131500 | 1.79009700  | 2.43081000  |
| Na | 2.37207000  | -2.15735100 | -0.59569600 |
| N  | -1.45456300 | 2.32578300  | -0.21558100 |
| N  | -0.41370700 | 2.06216500  | -0.53858300 |
| C  | 0.82765600  | 1.83300000  | -1.00047300 |
| H  | 0.92951100  | 1.69643200  | -2.06781500 |
| C  | 1.82659900  | 1.59183700  | -0.10269000 |
| H  | 1.66299600  | 1.55727300  | 0.96905700  |
| F  | 3.07090100  | 1.61968500  | -0.48991000 |
| F  | 2.02659200  | -0.42605300 | -1.53928200 |

### Int3

Zero-point correction= 0.172978 (Hartree/Particle)  
Thermal correction to Energy= 0.188037  
Thermal correction to Enthalpy= 0.189029  
Thermal correction to Gibbs Free Energy= 0.128264  
Sum of electronic and zero-point Energies= -762.973067  
Sum of electronic and thermal Energies= -762.958008  
Sum of electronic and thermal Enthalpies= -762.957016  
Sum of electronic and thermal Free Energies= -763.017781

|   |             |             |             |
|---|-------------|-------------|-------------|
| C | -2.28364300 | 1.77938700  | 0.63679700  |
| C | -1.27524000 | 0.82024500  | 0.71557600  |
| C | -1.40538200 | -0.39632500 | 0.02563400  |
| C | -2.56433800 | -0.63183300 | -0.73513000 |
| C | -3.56326700 | 0.32964000  | -0.81541100 |
| C | -3.42461800 | 1.53898600  | -0.12828600 |
| H | -2.17755400 | 2.71268800  | 1.18003900  |
| H | -0.40510700 | 1.02424800  | 1.32424100  |
| H | -2.65134100 | -1.57847400 | -1.25553600 |
| H | -4.45018600 | 0.14027300  | -1.41146500 |
| H | -4.20611000 | 2.29024200  | -0.18748000 |
| C | -0.39413400 | -1.49072300 | 0.04725700  |
| O | -0.63558200 | -2.58615000 | -0.42446700 |
| C | 1.04271500  | -1.29014100 | 0.61226100  |
| H | 1.42199300  | -2.31355500 | 0.69255300  |
| C | 1.13275800  | -0.67924000 | 1.93487800  |
| N | 1.23438100  | -0.20121600 | 2.98794200  |
| N | 3.45255400  | 2.50423500  | -0.73526700 |
| N | 2.61412900  | 1.72949000  | -0.71987500 |
| C | 1.65267200  | 0.85488800  | -0.66762000 |
| H | 0.67536000  | 1.19498200  | -0.97725000 |
| C | 1.98445100  | -0.56569700 | -0.39446300 |
| H | 3.00489700  | -0.62969600 | -0.00238600 |
| F | 1.92815700  | -1.33268800 | -1.56505900 |

### Int4

Zero-point correction= 0.177053 (Hartree/Particle)  
Thermal correction to Energy= 0.194535  
Thermal correction to Enthalpy= 0.195527  
Thermal correction to Gibbs Free Energy= 0.129588  
Sum of electronic and zero-point Energies= -925.817229  
Sum of electronic and thermal Energies= -925.799746

Sum of electronic and thermal Enthalpies= -925.798755  
Sum of electronic and thermal Free Energies= -925.864693

|    |             |             |             |
|----|-------------|-------------|-------------|
| C  | 3.04513800  | -0.71630900 | -1.53148400 |
| C  | 1.84488300  | -0.72385600 | -0.82407300 |
| C  | 1.76901600  | -0.12369800 | 0.44273700  |
| C  | 2.91440500  | 0.48170600  | 0.98634400  |
| C  | 4.10870900  | 0.48929900  | 0.27708900  |
| C  | 4.17575300  | -0.10936900 | -0.98435300 |
| H  | 3.09706700  | -1.18791700 | -2.50723900 |
| H  | 0.98465200  | -1.21782600 | -1.26016300 |
| H  | 2.83609900  | 0.93881100  | 1.96610300  |
| H  | 4.98872900  | 0.96018900  | 0.70316800  |
| H  | 5.10917900  | -0.10408500 | -1.53855300 |
| C  | 0.52440400  | -0.07640800 | 1.25847000  |
| O  | 0.50253000  | 0.39769700  | 2.37741200  |
| C  | -0.81797400 | -0.57338800 | 0.65753900  |
| H  | -1.56653500 | -0.54807100 | 1.47047600  |
| C  | -0.82042700 | -1.95261500 | 0.18053700  |
| N  | -0.96721800 | -3.04900600 | -0.17693600 |
| N  | -1.71798200 | 3.77986300  | -0.86931700 |
| N  | -1.82122200 | 2.74945400  | -0.39045300 |
| C  | -1.92209100 | 1.58936500  | 0.19222600  |
| H  | -2.60022900 | 1.49163400  | 1.03579500  |
| C  | -1.31919100 | 0.40747600  | -0.43023100 |
| H  | -0.53629000 | 0.66121700  | -1.14551100 |
| F  | -2.30201100 | -0.31982900 | -1.23337900 |
| Na | -3.76470900 | -1.56851600 | 0.03296300  |
| H  | -3.67381000 | -0.55876600 | 1.70258200  |

### TS3

Zero-point correction= 0.174097 (Hartree/Particle)  
Thermal correction to Energy= 0.191544  
Thermal correction to Enthalpy= 0.192536  
Thermal correction to Gibbs Free Energy= 0.127062  
Sum of electronic and zero-point Energies= -925.821614  
Sum of electronic and thermal Energies= -925.804168  
Sum of electronic and thermal Enthalpies= -925.803176  
Sum of electronic and thermal Free Energies= -925.868650

|   |             |             |             |
|---|-------------|-------------|-------------|
| C | -3.59953000 | 0.82340900  | 0.90444300  |
| C | -2.24642000 | 0.61771900  | 0.64283200  |
| C | -1.83804500 | -0.52469200 | -0.06151100 |



|    |             |             |             |
|----|-------------|-------------|-------------|
| C  | -2.79383900 | -1.45906000 | -0.48872700 |
| C  | -4.14280000 | -1.24341800 | -0.23432900 |
| C  | -4.54708200 | -0.09978500 | 0.46121600  |
| H  | -3.91277200 | 1.70326400  | 1.45713500  |
| H  | -1.51659500 | 1.32931100  | 1.01471300  |
| H  | -2.45172900 | -2.34185500 | -1.01737800 |
| H  | -4.88121000 | -1.96282300 | -0.57407500 |
| H  | -5.60113300 | 0.06816800  | 0.66066200  |
| C  | -0.40866900 | -0.80405600 | -0.35190000 |
| O  | -0.00892600 | -1.91392000 | -0.67850500 |
| C  | 0.58108700  | 0.33778400  | -0.19807200 |
| H  | 0.58242500  | 0.81357400  | 0.92599200  |
| C  | 0.27490700  | 1.52308800  | -0.96181500 |
| N  | 0.15004900  | 2.60856600  | -1.37190600 |
| N  | 3.98365600  | -2.81742100 | 0.36919200  |
| N  | 3.29443700  | -1.92570300 | 0.54553800  |
| C  | 2.49494000  | -0.92004000 | 0.74653700  |
| H  | 2.20485200  | -0.70936200 | 1.76722700  |
| C  | 2.03315100  | -0.11533400 | -0.39155600 |
| H  | 2.20279900  | -0.61385600 | -1.34564000 |
| F  | 2.82218700  | 1.12358500  | -0.47021100 |
| Na | 1.84933700  | 2.85592200  | 0.68969200  |
| H  | 0.85918900  | 1.62575200  | 1.98221700  |

### TS3'

|                                              |                             |
|----------------------------------------------|-----------------------------|
| Zero-point correction=                       | 0.166356 (Hartree/Particle) |
| Thermal correction to Energy=                | 0.181650                    |
| Thermal correction to Enthalpy=              | 0.182642                    |
| Thermal correction to Gibbs Free Energy=     | 0.121377                    |
| Sum of electronic and zero-point Energies=   | -762.918472                 |
| Sum of electronic and thermal Energies=      | -762.903178                 |
| Sum of electronic and thermal Enthalpies=    | -762.902186                 |
| Sum of electronic and thermal Free Energies= | -762.963451                 |

|   |             |             |             |
|---|-------------|-------------|-------------|
| C | -3.63996100 | 0.88022800  | 0.55693900  |
| C | -2.25317900 | 0.77781600  | 0.48077000  |
| C | -1.66064100 | -0.40830300 | 0.02392000  |
| C | -2.47553500 | -1.49024800 | -0.34318700 |
| C | -3.85953600 | -1.37960600 | -0.27879200 |
| C | -4.44394600 | -0.19290800 | 0.17131100  |
| H | -4.09163900 | 1.79858600  | 0.91730700  |
| H | -1.64194200 | 1.61662000  | 0.79056700  |
| H | -2.00012900 | -2.40564400 | -0.67658600 |

|   |             |             |             |
|---|-------------|-------------|-------------|
| H | -4.48438800 | -2.21592600 | -0.57562600 |
| H | -5.52487300 | -0.10640400 | 0.22431000  |
| C | -0.18592200 | -0.60637100 | -0.04542500 |
| O | 0.28809500  | -1.73922400 | -0.03016900 |
| C | 0.70297500  | 0.61192000  | -0.06720200 |
| H | 0.95437700  | 0.98573100  | 1.12774600  |
| C | 0.26078900  | 1.73106700  | -0.86501000 |
| N | -0.07285900 | 2.64887100  | -1.49664900 |
| N | 5.29445200  | -0.81413600 | -0.25556100 |
| N | 4.16663300  | -0.77914400 | -0.18274100 |
| C | 2.84487500  | -0.77770300 | -0.11615100 |
| H | 2.34842200  | -1.73362100 | -0.01678700 |
| C | 2.18095300  | 0.45621900  | -0.08297400 |
| H | 2.74062600  | 1.33768500  | -0.37100600 |
| F | 2.09466300  | 1.07055100  | 1.75121000  |

### Int5

|                                              |                             |
|----------------------------------------------|-----------------------------|
| Zero-point correction=                       | 0.157629 (Hartree/Particle) |
| Thermal correction to Energy=                | 0.171069                    |
| Thermal correction to Enthalpy=              | 0.172060                    |
| Thermal correction to Gibbs Free Energy=     | 0.115716                    |
| Sum of electronic and zero-point Energies=   | -662.546193                 |
| Sum of electronic and thermal Energies=      | -662.532753                 |
| Sum of electronic and thermal Enthalpies=    | -662.531761                 |
| Sum of electronic and thermal Free Energies= | -662.588106                 |

|   |             |             |             |
|---|-------------|-------------|-------------|
| C | -3.46487300 | 0.77697100  | 0.72916800  |
| C | -2.07506400 | 0.73150100  | 0.63726800  |
| C | -1.44687000 | -0.36148800 | 0.02328000  |
| C | -2.23168800 | -1.41141600 | -0.48005100 |
| C | -3.61807900 | -1.35380100 | -0.40298200 |
| C | -4.23786400 | -0.25733800 | 0.20221200  |
| H | -3.94229800 | 1.62311700  | 1.21257900  |
| H | -1.49065900 | 1.53923900  | 1.05854200  |
| H | -1.73058000 | -2.26187700 | -0.92806000 |
| H | -4.21724000 | -2.16250200 | -0.80948000 |
| H | -5.32079200 | -0.21226800 | 0.26598600  |
| C | 0.03442400  | -0.52214700 | -0.06517200 |
| O | 0.51976600  | -1.65627300 | -0.07711800 |
| C | 0.92827800  | 0.66319800  | -0.15694000 |
| C | 0.41505200  | 1.97119200  | -0.40794600 |
| N | 0.03525800  | 3.05137100  | -0.62386500 |
| N | 5.49043500  | -0.51948900 | 0.28734600  |

|   |            |             |             |
|---|------------|-------------|-------------|
| N | 4.35721100 | -0.55297600 | 0.20654600  |
| C | 3.04481500 | -0.62817300 | 0.11240000  |
| H | 2.60219600 | -1.61323400 | 0.16938900  |
| C | 2.30018700 | 0.55902200  | -0.07238400 |
| H | 2.87101200 | 1.48023700  | -0.15532700 |

#### TS4

|                                              |                             |
|----------------------------------------------|-----------------------------|
| Zero-point correction=                       | 0.154823 (Hartree/Particle) |
| Thermal correction to Energy=                | 0.168184                    |
| Thermal correction to Enthalpy=              | 0.169175                    |
| Thermal correction to Gibbs Free Energy=     | 0.113108                    |
| Sum of electronic and zero-point Energies=   | -662.503950                 |
| Sum of electronic and thermal Energies=      | -662.490589                 |
| Sum of electronic and thermal Enthalpies=    | -662.489598                 |
| Sum of electronic and thermal Free Energies= | -662.545665                 |

|   |             |             |             |
|---|-------------|-------------|-------------|
| C | -3.62174600 | 0.69407500  | 0.22856400  |
| C | -2.23513400 | 0.79915900  | 0.31277200  |
| C | -1.43022500 | -0.32324700 | 0.06388600  |
| C | -2.03797000 | -1.54862000 | -0.25759200 |
| C | -3.42118700 | -1.64495400 | -0.34917800 |
| C | -4.21687900 | -0.52227800 | -0.10651400 |
| H | -4.23695800 | 1.56595200  | 0.42606300  |
| H | -1.79111800 | 1.74883300  | 0.58038900  |
| H | -1.40351300 | -2.40950100 | -0.43347100 |
| H | -3.88143600 | -2.59336800 | -0.60780800 |
| H | -5.29780000 | -0.59681000 | -0.17643500 |
| C | 0.04731000  | -0.29822100 | 0.15732600  |
| O | 0.68322300  | -1.37690200 | 0.27479700  |
| C | 0.87929900  | 0.88039000  | 0.08270000  |
| C | 0.45194900  | 2.21163200  | -0.16260700 |
| N | 0.12359300  | 3.31424700  | -0.35076900 |
| N | 5.37617800  | -0.88111200 | -0.41694400 |
| N | 4.41141200  | -0.59594400 | 0.06955900  |
| C | 2.69744600  | -0.73283400 | 0.22267600  |
| H | 2.70044200  | -1.50173800 | 0.97582000  |
| C | 2.23920100  | 0.57905300  | 0.13413500  |
| H | 2.95392700  | 1.37657500  | -0.03287000 |

#### 4w

|                               |                             |
|-------------------------------|-----------------------------|
| Zero-point correction=        | 0.150461 (Hartree/Particle) |
| Thermal correction to Energy= | 0.160968                    |

Thermal correction to Enthalpy= 0.161960  
 Thermal correction to Gibbs Free Energy= 0.112495  
 Sum of electronic and zero-point Energies= -553.116364  
 Sum of electronic and thermal Energies= -553.105857  
 Sum of electronic and thermal Enthalpies= -553.104865  
 Sum of electronic and thermal Free Energies= -553.154330

|   |             |             |             |
|---|-------------|-------------|-------------|
| C | 2.60875100  | 1.30875000  | 0.00008000  |
| C | 1.23388300  | 1.09636100  | 0.00005000  |
| C | 0.72164000  | -0.21340900 | -0.00003600 |
| C | 1.61812300  | -1.29755000 | -0.00009100 |
| C | 2.99059300  | -1.07412900 | -0.00004800 |
| C | 3.49251400  | 0.22844400  | 0.00004000  |
| H | 2.98998700  | 2.32486100  | 0.00015000  |
| H | 0.56262000  | 1.94617000  | 0.00009300  |
| H | 1.22950700  | -2.30896900 | -0.00015200 |
| H | 3.67071400  | -1.92013100 | -0.00008000 |
| H | 4.56424000  | 0.40016400  | 0.00007000  |
| C | -0.71214800 | -0.46124500 | -0.00003100 |
| O | -1.11807600 | -1.76222100 | 0.00001100  |
| C | -1.84042200 | 0.34424500  | -0.00005400 |
| C | -1.89117300 | 1.75977300  | -0.00010800 |
| N | -1.94826000 | 2.92294100  | -0.00000300 |
| C | -2.48515500 | -1.79235900 | 0.00016500  |
| H | -2.93339900 | -2.77244800 | 0.00000300  |
| C | -2.98350800 | -0.53229200 | -0.00002000 |
| H | -4.01982500 | -0.23200500 | 0.00016700  |
